# Supplementary material
Source: HighWire-hosted journal article supplement (doi:10.1101/rna.049890.115)
Supplement: TableS2.xlsx [file TableS2.xlsx]

## Sheet: Sheet1
Gene data / experimental values								Experiment 1				Experiment 2				Experiment 3				Inclusion values			Data Analysis
SiRNA	Well	Pool Catalog Number	Duplex Catalog Number	Gene Symbol	GENE ID	Gene Accession	GI Number	inclusion	skipping	total	% inc	inclusion	skipping	total	% inc	inclusion	skipping	total	% inc	exp1	exp2	exp3	median	stdev	pvalue	z-score						Mock					Untransfected					Untransfected
1	A01	-	-	No cells	-	-	-	0	0	0		0	0	0		0	0	0														100	100	91.7412			100	91.3665	93.0206			7.35532	1.27816	0.375886
2	A02	-	-	No cells	-	-	-	0	0	0		0	0	0		0	0	0														78.8875	91.7289	88.8581			93.9378	93.4084	93.422			1.29313	0.763704	0.777335
3	A03	L-005151-01	J-005151-09	SRSF4	6429	NM_005626	34147660	4.59214	0.528862	5.121	89.6727	17.1571	1.70128	18.8584	90.9787	10.2949	0.384417	10.6793	96.4003	89.6727	90.9787	96.4003	90.9787	3.56749	0.601543	-0.662821						100	89.9238	89.7577			95.4878	92.2688	88.3168			2.84313	0.375886	4.32789
4	A04	L-011929-00	J-011929-05	SRSF11	9295	NM_004768	23111060	2.74059	0.275776	3.01637	90.8574	12.1637	0.837805	13.0015	93.5561	8.69613	0.880646	9.57677	90.8044	90.8574	93.5561	90.8044	90.8574	1.57362	0.406112	-0.711073						100	91.1344	88.1223			100	90.2197	91.2524			7.35532	2.42495	1.39225
5	A05	L-016067-01	J-016067-09	SRSF6	6431	NM_006275	38158029	1.18726	0	1.18726	100	19.3783	2.62616	22.0045	88.0653	10.5094	1.92123	12.4306	84.5444	100	88.0653	84.5444	88.0653	8.10052	0.328473	-1.82187						86.1939	93.3046	85.5083			90.6462	95.5464	100			1.99849	2.90175	7.35532
6	A06	L-007279-01	J-007279-09	SRSF5	6430	NM_006925	86991439	3.59119	0.38978	3.98097	90.2089	10.257	0.80835	11.0653	92.6948	12.8596	1.89851	14.7581	87.1358	90.2089	92.6948	87.1358	90.2089	2.78464	0.117864	-0.969058						92.5186	90.3945	86.9725			91.634	92.2562	90.3763			1.01065	0.388486	2.26837
7	A07	L-018672-01	J-018672-09	SRSF1	6426	NM_006924	31543618	7.60948	1.92359	9.53307	79.8219	11.5125	2.96916	14.4817	79.4972	11.8887	2.53222	14.4209	82.4406	79.8219	79.4972	82.4406	79.8219	1.61383	5.88209e-06	-5.10147					Median	90.7645				Median	92.6447				Median	1.69537
8	A08	L-015909-00	J-015909-05	SRSF7	6432	NM_001031684	72534659	9.81531	0.380581	10.1959	96.2673	12.4304	1.02549	13.4559	92.3788	14.7232	0.662448	15.3856	95.6944	96.2673	92.3788	95.6944	95.6944	2.09926	0.552418	1.2133					Stdev	5.75011				Stdev	3.48947				Stdev	2.43008
9	A09	L-019711-00	J-019711-05	SRSF2	6427	NM_003016	47271442	3.06435	0.30917	3.37352	90.8354	5.95031	0.500457	6.45077	92.2419	5.33937	0.135402	5.47478	97.5268	90.8354	92.2419	97.5268	92.2419	3.52807	0.990673	-0.160244															MAD	2.51355
10	A10	L-019529-01	J-019529-09	SRSF9	8683	NM_003769	38016912	3.84272	0.464431	4.30715	89.2172	8.85498	1.2466	10.1016	87.6593	14.716	1.34291	16.0589	91.6376	89.2172	87.6593	91.6376	89.2172	2.00465	0.0715337	-1.36361
11	A11	L-007278-00	J-007278-05	SRSF10	6434	NM_004593	4759097	1.88337	0.305078	2.18845	86.0596	7.24252	0.56758	7.8101	92.7327	14.3534	1.8706	16.224	88.4702	86.0596	92.7327	88.4702	88.4702	3.37912	0.0556615	-1.66081
12	A12	L-030081-00	J-030081-05	SRSF3	6428	NM_003017	31377552	6.7013	0.490291	7.19159	93.1825	5.39616	0.846936	6.24309	86.434	13.0541	1.8093	14.8634	87.8272	93.1825	86.434	87.8272	87.8272	3.56279	0.0600472	-1.91662
13	B01	-	-	Untransfected	-	-	-	0.412932	0	0.412932	100	19.817	1.87256	21.6895	91.3665	11.9864	0.899351	12.8857	93.0206	100	91.3665	93.0206	93.0206	4.58231	0.57535	0.149544
14	B02	-	-	Untransfected	-	-	-	9.668	0.623915	10.2919	93.9378	16.1729	1.14128	17.3141	93.4084	15.8302	1.11463	16.9449	93.422	93.9378	93.4084	93.422	93.422	0.301804	0.96922	0.309258
15	B03	L-015368-00	J-015368-07	SRRM2	23524	NM_016333	19923465	6.02853	0.443154	6.47168	93.1524	8.70116	1.55564	10.2568	84.833	11.0109	1.72112	12.732	86.482	93.1524	84.833	86.482	86.482	4.40502	0.0275654	-2.45178
16	B04	L-021234-01	J-021234-09	DDX46	9879	NM_014829	41327772	5.8963	0.401107	6.29741	93.6306	23.8494	1.58031	25.4297	93.7856	3.57042	0.359414	3.92983	90.8542	93.6306	93.7856	90.8542	93.6306	1.6495	0.72232	0.392242
17	B05	L-019013-02	J-019013-17	CRNKL1	51340	NM_016652	124256488	0.167772	0	0.167772	100	2.9354	0.375644	3.31105	88.6548	1.71077	0.550813	2.26159	75.6448	100	88.6548	75.6448	88.6548	12.1871	0.108537	-1.58734
18	B06	L-011237-00	J-011237-05	CDC5L	988	NM_001253	16357499	0.597747	0.227069	0.824817	72.4703	6.25601	1.40115	7.65716	81.7014	7.49698	0.934956	8.43194	88.9117	72.4703	81.7014	88.9117	81.7014	8.24138	0.000151888	-4.3537
19	B07	L-019672-00	J-019672-05	NCBP1	4686	NM_002486	52851457	4.42669	0	4.42669	100	9.44958	1.20625	10.6558	88.6799	15.8401	1.23394	17.074	92.773	100	88.6799	92.773	92.773	5.73191	0.897409	0.0510382
20	B08	L-012662-01	J-012662-09	SF1	7536	NM_201997	42544126	5.66467	0.459695	6.12437	92.494	15.916	1.43144	17.3475	91.7484	19.4908	2.60961	22.1004	88.192	92.494	91.7484	88.192	91.7484	2.29895	0.216559	-0.356576
21	B09	L-012446-00	J-012446-05	SKIIP	22938	NM_012245	18860912	0.271015	0	0.271015	100	2.12829	0.398889	2.52718	84.216	1.10414	0.15405	1.25819	87.7562	100	84.216	87.7562	87.7562	8.28227	0.296135	-1.94484
22	B10	L-012505-01	J-012505-09	SIAHBP1	22827	NM_014281	17978510	6.98563	0.140049	7.12568	98.0346	3.82332	0	3.82332	100	11.7582	0.183332	11.9415	98.4647	98.0346	100	98.4647	98.4647	1.03319	0.0186105	2.31548
23	B11	L-019593-00	J-019593-05	PLRG1	5356	NM_002669	77404429	5.87835	0.618511	6.49686	90.4798	7.34767	1.28954	8.63721	85.07	10.0309	2.33889	12.3698	81.092	90.4798	85.07	81.092	85.07	4.71209	0.0023429	-3.01354
24	B12	L-004668-00	J-004668-05	PRPF19	27339	NM_014502	34222313	6.41277	0.927575	7.34034	87.3633	0.438769	0	0.438769	100	9.67388	1.46717	11.1411	86.831	87.3633	100	86.831	87.3633	7.45422	0.418395	-2.10116
25	C01	-	-	Mock SiRNA	-	-	-	0.845129	0	0.845129	100	0.682	0	0.682	100	14.2173	1.27988	15.4972	91.7412	100	100	91.7412	100	4.76823	0.11653	2.92627
26	C02	-	-	Mock SiRNA	-	-	-	1.15691	0.309621	1.46653	78.8875	11.3685	1.02508	12.3936	91.7289	11.778	1.47684	13.2548	88.8581	78.8875	91.7289	88.8581	88.8581	6.73987	0.0104208	-1.50647
27	C03	L-012380-02	J-012380-18	U2AF2	11338	NM_001012478	60279267	2.01793	0.256423	2.27436	88.7255	4.04285	0.884243	4.92709	82.0535	4.44853	0.444174	4.8927	90.9217	88.7255	82.0535	90.9217	88.7255	4.61852	0.0120348	-1.55924
28	C04	L-012325-01	J-012325-09	U2AF1	7307	NM_006758	68800039	0.789541	0.318764	1.1083	71.2386	6.56786	1.99455	8.56241	76.7057	1.79109	0.371718	2.16281	82.8132	71.2386	76.7057	82.8132	76.7057	5.79023	1.13663e-06	-6.34121
29	C05	L-016257-00	J-016257-05	SMNDC1	10285	NM_005871	21361283	1.33497	0.145512	1.48048	90.1713	2.08353	0.393104	2.47663	84.1275	2.37127	0.416936	2.7882	85.0464	90.1713	84.1275	85.0464	85.0464	3.2567	0.00405695	-3.02292
30	C06	L-015327-00	J-015327-05	NCBP2	22916	NM_007362	19923386	2.0293	0.358908	2.38821	84.9717	2.27094	0.168581	2.43952	93.0896	9.01023	1.17673	10.187	88.4486	84.9717	93.0896	88.4486	88.4486	4.07283	0.0486056	-1.66937
31	C07	L-027984-01	J-027984-09	FNBP3	55660	XM_938514	88957852	4.06719	0.500752	4.56794	89.0377	5.30014	0.853524	6.15367	86.1298	5.32286	0.972344	6.2952	84.5542	89.0377	86.1298	84.5542	86.1298	2.2745	0.00386838	-2.59189
32	C08	L-018811-00	J-018811-05	SNRP70	6625	NM_003089	57634537	6.77984	1.05714	7.83698	86.5109	15.0972	2.26557	17.3628	86.9516	12.9374	2.54327	15.4807	83.5713	86.5109	86.9516	83.5713	86.5109	1.83762	0.00137502	-2.4403
33	C09	L-019435-02	J-019435-17	SNRPA	6626	NM_004596	39725715	0	0	0		18.5042	0.786923	19.2911	95.9208	15.7428	0.932939	16.6757	94.4054		95.9208	94.4054	95.1631	1.07154	0.522233	1.00194
34	C10	L-019574-02	J-019574-17	SNRPC	6631	NM_003093	4507126	8.00492	0.815374	8.82029	90.7557	10.6768	0.979673	11.6565	91.5955	8.35306	0.942771	9.29583	89.8581	90.7557	91.5955	89.8581	90.7557	0.86884	0.195401	-0.751517
35	C11	L-020061-01	J-020061-13	SF3B1	23451	NM_001005526	54112118	0.663103	1.5902	2.2533	29.4281	0.382401	0.556279	0.93868	40.7382	1.18986	2.63839	3.82825	31.081	29.4281	40.7382	31.081	31.081	6.1089	5.7778e-16	-24.4927
36	C12	L-026599-01	J-026599-09	SF3B2	10992	NM_006842	55749530	1.48149	0.87038	2.35187	62.992	0.528723	0.230824	0.759547	69.6103	3.50405	2.20838	5.71243	61.3408	62.992	69.6103	61.3408	62.992	4.37633	7.76714e-11	-11.7972
37	D01	L-011803-00	J-011803-05	PABPN1	8106	NM_004643	4758875	0	0	0		4.42282	0.162873	4.58569	96.4482	4.0649	0.344366	4.40926	92.1899		96.4482	92.1899	94.3191	3.01107	0.757326	0.666151
38	D02	L-006455-00	J-006455-06	SFPQ	6421	NM_005066	4826997	11.1291	1.7819	12.911	86.1985	25.6795	2.72248	28.402	90.4145	13.4983	2.3307	15.829	85.2757	86.1985	90.4145	85.2757	86.1985	2.7396	0.00889211	-2.56456
39	D03	L-020085-00	J-020085-05	SF3B3	23450	NM_012426	54112120	0.67159	0.39117	1.06276	63.193	2.98913	1.00632	3.99545	74.8133	0.297519	0.39475	0.69227	42.9774	63.193	74.8133	42.9774	63.193	16.1102	5.56034e-08	-11.7172
40	D04	L-016051-00	J-016051-05	SF3A1	10291	NM_001005409	53831994	1.54668	0.592073	2.13875	72.3169	3.64883	1.53601	5.18483	70.375	2.74797	1.28025	4.02821	68.218	72.3169	70.375	68.218	70.375	2.0504	1.02711e-09	-8.85985
41	D05	L-018282-02	J-018282-17	SF3A2	8175	NM_007165	54112114	0.474231	0	0.474231	100	0.197506	0	0.197506	100	1.69362	0.718952	2.41257	70.1997	100	100	70.1997	100	17.2052	0.405259	2.92627
42	D06	L-019808-00	J-019808-05	SF3A3	10946	NM_006802	54112115	1.65127	0.498403	2.14967	76.815	4.37288	1.154	5.52688	79.1203	2.09449	1.32384	3.41833	61.2723	76.815	79.1203	61.2723	76.815	9.7077	5.04551e-07	-6.29776
43	D07	L-017190-00	J-017190-05	SF3B4	10262	NM_005850	23111059	0.49878	0.197694	0.696474	71.615	1.57295	0.624047	2.197	71.5955	5.17703	2.92923	8.10626	63.8646	71.615	71.5955	63.8646	71.5955	4.46907	1.30951e-09	-8.37429
44	D08	L-019577-01	J-019577-09	SNRPA1	6627	NM_003090	50593001	1.46445	0.678006	2.14246	68.3538	6.03808	2.32236	8.36045	72.222	3.19352	1.06038	4.2539	75.0728	68.3538	72.222	75.0728	72.222	3.3723	5.49864e-09	-8.12503
45	D09	L-016910-01	J-016910-09	SNRPB2	6629	NM_198220	38149980	1.65641	0.888994	2.54541	65.0746	2.22751	1.40469	3.6322	61.3268	3.23527	1.27221	4.50749	71.7756	65.0746	61.3268	71.7756	65.0746	5.29348	3.29457e-10	-10.9686
46	D10	L-020260-02	J-020260-18	P14	51639	NM_016047	54607092	0.461403	0	0.461403	100	0.37337	0	0.37337	100	0.766728	0.425017	1.19175	64.3366	100	100	64.3366	100	20.5903	0.259862	2.92627
47	D11	L-012252-00	J-012252-06	PRPF8	10594	NM_006445	17999536	4.09679	1.42774	5.52453	74.1564	3.13969	0.433913	3.5736	87.8578	4.49219	1.52664	6.01883	74.6356	74.1564	87.8578	74.6356	74.6356	7.77589	1.92116e-05	-7.16482
48	D12	L-014161-00	J-014161-05	U5-200KD	23020	NM_014014	40217846	0.520491	0.135526	0.656017	79.341	0.643918	0	0.643918	100	1.86688	0.696415	2.56329	72.8312	79.341	100	72.8312	79.341	14.1852	0.0149397	-5.29277
49	E01	L-007756-01	J-007756-09	NONO	4841	NM_007363	34932413	6.60144	0.630866	7.23231	91.2771	24.9604	1.74239	26.7027	93.4749	17.0852	0.944794	18.03	94.7599	91.2771	93.4749	94.7599	93.4749	1.76121	0.873068	0.330281
50	E02	L-020672-01	J-020672-09	RBM35A	54845	NM_017697	56790296	5.65024	0.179046	5.82928	96.9285	18.6881	1.13142	19.8196	94.2914	13.6632	0.973787	14.637	93.3471	96.9285	94.2914	93.3471	94.2914	1.8562	0.527486	0.655124
51	E03	L-019851-01	J-019851-09	U5-116KD	9343	NM_004247	41152055	1.73726	0.245092	1.98235	87.6363	5.61732	0.823379	6.4407	87.216	2.23801	0.594694	2.8327	79.0061	87.6363	87.216	79.0061	87.216	4.86585	0.000971629	-2.15977
52	E04	L-012821-01	J-012821-09	C20ORF14	24148	NM_012469	91208424	3.55229	0.635642	4.18793	84.8221	7.02977	1.35379	8.38356	83.8519	3.88632	0.846007	4.73233	82.1228	84.8221	83.8519	82.1228	83.8519	1.36728	0.00013268	-3.49815
53	E05	L-019861-01	J-019861-09	DDX23	9416	NM_004818	41327770	0.625452	0	0.625452	100	0.564404	0	0.564404	100	0.944878	0.218163	1.16304	81.242	100	100	81.242	100	10.8299	0.937614	2.92627
54	E06	L-020057-00	J-020057-05	CD2BP2	10421	NM_006110	5174408	2.7395	0.17121	2.91071	94.1179	17.7421	1.00657	18.7487	94.6312	8.94559	0.845618	9.79121	91.3635	94.1179	94.6312	91.3635	94.1179	1.75729	0.948013	0.586116
55	E07	L-019860-00	J-019860-05	HPRP8BP	9410	NM_004814	4758559	7.46304	0.745429	8.20847	90.9188	18.2473	1.17769	19.425	93.9372	12.5017	1.18547	13.6872	91.3388	90.9188	93.9372	91.3388	91.3388	1.63499	0.496929	-0.519526
56	E08	L-008361-01	J-008361-09	TXNL4	10907	NM_006701	20070233	5.3883	0.341403	5.7297	94.0415	14.1225	1.33161	15.4541	91.3835	9.27311	0.990432	10.2635	90.35	94.0415	91.3835	90.35	91.3835	1.90441	0.458713	-0.50176
57	E09	L-019836-01	J-019836-09	PRPF3	9129	NM_004698	4758555	5.29141	0.389049	5.68046	93.1511	8.19825	0.385409	8.58366	95.51	10.2536	1.06169	11.3153	90.6172	93.1511	95.51	90.6172	93.1511	2.4469	0.846258	0.201479
58	E10	L-015638-00	J-015638-05	PRPF4	9128	NM_004697	34222192	11.9303	1.38787	13.3182	89.5791	13.3444	1.85277	15.1972	87.8085	12.6589	1.66265	14.3215	88.3906	89.5791	87.8085	88.3906	88.3906	0.902461	0.0279964	-1.69248
59	E11	L-020525-00	J-020525-05	PRPF31	26121	NM_015629	40254868	6.40313	1.41388	7.81701	81.9128	8.97121	2.08632	11.0575	81.1322	10.5379	2.52806	13.0659	80.6515	81.9128	81.1322	80.6515	81.1322	0.636558	9.92878e-06	-4.58019
60	E12	L-008907-01	J-008907-09	PPIH	10465	NM_006347	45439322	2.80362	0.679612	3.48323	80.489	1.128	0.362882	1.49088	75.6599	1.87198	1.36837	3.24036	57.7709	80.489	75.6599	57.7709	75.6599	11.9683	1.1797e-06	-6.7573
61	F01	L-014523-00	J-014523-05	RBM35B	80004	NM_024939	45935392	0.182059	0	0.182059	100	12.8999	0.7605	13.6604	94.4328	9.8905	1.07986	10.9704	90.1565	100	94.4328	90.1565	94.4328	4.93582	0.560878	0.711391
62	F02	L-014790-01	J-014790-09	CCDC55	84081	NM_032141	75677366	14.4683	1.45031	15.9186	90.8892	9.50643	1.43627	10.9427	86.8747	10.101	1.11563	11.2167	90.0538	90.8892	86.8747	90.0538	90.0538	2.11824	0.0582876	-1.03076
63	F03	L-019900-00	J-019900-05	NHP2L1	4809	NM_001003796	51317375	0	0	0		0.388953	0	0.388953	100	0.4139	0	0.4139	100		100	100	100	0	0.0193538	2.92627
64	F04	L-017283-00	J-017283-05	SART1	9092	NM_005146	38788009	0	0	0		0	0	0		0.321619	0.246763	0.568382	56.5849			56.5849	56.5849	#DIV/0!		-14.3461
65	F05	L-006087-00	J-006087-05	USP39	10713	NM_006590	56550050	0.167684	0.0715226	0.239207	70.1001	1.53821	0.205706	1.74392	88.2044	0.634619	0	0.634619	100	70.1001	88.2044	100	88.2044	15.0605	0.0583427	-1.76656
66	F06	L-012758-01	J-012758-09	RY1	11017	NM_006857	24307918	6.62956	0.716118	7.34568	90.2512	13.9863	1.68251	15.6688	89.2621	9.94968	1.16725	11.1169	89.5002	90.2512	89.2621	89.5002	89.5002	0.516223	0.0781337	-1.251
67	F07	L-017766-01	J-017766-09	SNRPB	6628	NM_198216	38150006	0.817933	0.222049	1.03998	78.6487	3.75641	1.70673	5.46314	68.7592	1.05776	0.194245	1.252	84.4853	78.6487	68.7592	84.4853	78.6487	7.94963	5.81633e-06	-5.5682
68	F08	L-012353-01	J-012353-09	SNRPD1	6632	NM_006938	28416941	1.27139	0.730481	2.00187	63.5101	3.81258	2.45076	6.26334	60.8713	0.657863	0.691423	1.34929	48.7563	63.5101	60.8713	48.7563	60.8713	7.86776	2.49562e-11	-12.6408
69	F09	L-013617-01	J-013617-09	SNRPD2	6633	NM_004597	29294622	0.986503	0.713158	1.69966	58.0412	1.95256	0.747627	2.70019	72.312	2.3851	1.68501	4.07012	58.6004	58.0412	72.312	58.6004	58.6004	8.08268	4.51059e-10	-13.5443
70	F10	L-019085-02	J-019085-17	SNRPD3	6634	NM_004175	34328935	1.31616	1.1058	2.42197	54.3428	2.91648	1.88422	4.8007	60.7511	1.57159	1.22277	2.79437	56.2415	54.3428	60.7511	56.2415	56.2415	3.29164	7.19567e-13	-14.4828
71	F11	L-019719-02	J-019719-17	SNRPE	6635	NM_003094	61098048	4.52364	0.246777	4.77042	94.8269	14.9878	0.892865	15.8806	94.3776	13.692	1.51104	15.203	90.0609	94.8269	94.3776	90.0609	94.3776	2.63157	0.845355	0.689447
72	F12	L-019575-02	J-019575-17	SNRPF	6636	NM_003095	83776586	1.15577	1.15708	2.31285	49.9716	3.07423	1.98027	5.05451	60.8216	3.95905	2.61505	6.57409	60.2219	49.9716	60.8216	60.2219	60.2219	6.0985	4.30455e-12	-12.8992
73	G01	L-004597-00	J-004597-05	HMGA1	3159	NM_145903	22208974	2.58933	0.30076	2.89009	89.5934	13.3588	1.00216	14.361	93.0217	5.49225	0.518816	6.01106	91.369	89.5934	93.0217	91.369	91.369	1.71451	0.30923	-0.507529
74	G02	L-008290-00	J-008290-06	DBR1	51163	NM_016216	56549112	4.706	0.377252	5.08325	92.5785	14.5551	1.37495	15.9301	91.3688	5.56444	0.482012	6.04646	92.0282	92.5785	91.3688	92.0282	92.0282	0.605661	0.47089	-0.245269
75	G03	L-016821-02	J-016821-17	SNRPG	6637	NM_003096	21359839	1.86919	0.57157	2.44076	76.5823	13.6889	3.06128	16.7502	81.7239	4.02824	1.1737	5.20195	77.4372	76.5823	81.7239	77.4372	77.4372	2.75506	1.14685e-06	-6.05019
76	G04	L-017813-00	J-017813-05	LSM2	57819	NM_021177	34013512	0.634025	0	0.634025	100	0.57943	0.0857412	0.665171	87.1099	2.09694	0.463678	2.56062	81.892	100	87.1099	81.892	87.1099	9.32096	0.184795	-2.20198
77	G05	L-020240-01	J-020240-09	LSM3	27258	NM_014463	7657314	8.1403	1.2021	9.34241	87.1328	10.3871	1.97578	12.3628	84.0184	5.96314	0.818709	6.78185	87.9279	87.1328	84.0184	87.9279	87.1328	2.06626	0.00297909	-2.19285
78	G06	L-017025-01	J-017025-09	LSM4	25804	NM_012321	33620778	2.48081	0.326479	2.80728	88.3703	10.2411	1.77347	12.0146	85.239	4.99165	0.879071	5.87072	85.0262	88.3703	85.239	85.0262	85.239	1.8723	0.00246964	-2.94629
79	G07	L-019754-01	J-019754-09	LSM6	11157	NM_007080	5901997	0.437513	0	0.437513	100	4.63191	0.56746	5.19937	89.086	1.31581	0.544637	1.86045	70.7255	100	89.086	70.7255	89.086	14.7943	0.0726059	-1.4158
80	G08	L-021189-01	J-021189-09	LSM7	51690	NM_016199	7706422	12.983	2.19476	15.1777	85.5396	16.0383	2.22839	18.2667	87.8008	7.92396	1.31397	9.23793	85.7764	85.5396	87.8008	85.7764	85.7764	1.24281	0.00273473	-2.7325
81	G09	L-013428-00	J-013428-05	DHX38	9785	NM_014003	41406095	9.12109	1.02026	10.1414	89.9396	24.9358	2.38733	27.3231	91.2626	8.39531	0.775631	9.17094	91.5425	89.9396	91.2626	91.5425	91.2626	0.856127	0.224419	-0.549863
82	G10	L-010506-00	J-010506-06	DHX8	1659	NM_004941	4826689	12.6402	1.79214	14.4324	87.5825	10.9188	1.58706	12.5059	87.3095	7.01213	0.946319	7.95845	88.1093	87.5825	87.3095	88.1093	87.5825	0.406511	0.0105648	-2.01395
83	G11	L-011250-01	J-011250-09	DHX15	1665	NM_001358	68509925	7.38245	0.88664	8.26909	89.2777	9.80123	1.11295	10.9142	89.8027	9.84106	1.48206	11.3231	86.9112	89.2777	89.8027	86.9112	89.2777	1.54038	0.0311553	-1.33955
84	G12	L-017191-01	J-017191-09	SLU7	10569	NM_006425	27477110	4.5517	1.01707	5.56877	81.7362	2.37948	0.336952	2.71643	87.5958	3.88784	0.638514	4.52635	85.8934	81.7362	87.5958	85.8934	85.8934	3.01429	0.00090208	-2.68596
85	H01	L-015405-01	J-015405-09	DIS3	22894	NM_014953	19923415	8.97048	0.85313	9.82361	91.3155	21.0368	1.2058	22.2426	94.5789	4.53371	0.373381	4.90709	92.391	91.3155	94.5789	92.391	92.391	1.66297	0.724137	-0.100931
86	H02	L-013760-00	J-013760-05	EXOSC4	54512	NM_019037	56699483	9.08971	0.545546	9.63526	94.338	20.5428	1.26776	21.8105	94.1874	8.00532	0.912415	8.91773	89.7685	94.338	94.1874	89.7685	94.1874	2.59581	0.729935	0.613765
87	H03	L-013213-01	J-013213-09	CDC40	51362	NM_015891	38570087	1.77264	0.340413	2.11305	83.89	7.61598	1.9886	9.60458	79.2952	1.86511	0.583277	2.44839	76.1771	83.89	79.2952	76.1771	79.2952	3.87991	5.54516e-06	-5.31099
88	H04	L-011497-00	J-011497-05	PRPF18	8559	NM_003675	17999533	5.76484	0.595517	6.36036	90.6371	11.9731	1.37567	13.3488	89.6944	1.83935	0.250178	2.08953	88.027	90.6371	89.6944	88.027	89.6944	1.32167	0.0655687	-1.17374
89	H05	L-020041-02	J-020041-17	SRRM1	10250	NM_005839	115648109	7.35773	0.874583	8.23231	89.3762	11.521	1.61715	13.1382	87.6912	3.68126	0.0939777	3.77524	97.5107	89.3762	87.6912	97.5107	89.3762	5.25089	0.402651	-1.30034
90	H06	L-003805-00	J-003805-05	BAT1	7919	NM_080598	45580711	4.74408	0.648557	5.39263	87.9733	18.0459	3.38804	21.4339	84.1931	8.62149	1.20576	9.82725	87.7305	87.9733	84.1931	87.7305	87.7305	2.11588	0.00402088	-1.95508
91	H07	L-012298-00	J-012298-06	RNPS1	10921	NM_080594	18379333	0.114178	0	0.114178	100	3.83642	0.605564	4.44198	86.3673	1.06902	0.161255	1.23028	86.8928	100	86.3673	86.8928	86.8928	7.72361	0.360388	-2.28834
92	H08	L-012078-00	J-012078-05	THOC4	10189	NM_005782	55770863	1.96304	0.173313	2.13636	91.8874	2.84334	0.371372	3.21471	88.4477	1.19407	0.188438	1.38251	86.3699	91.8874	88.4477	86.3699	88.4477	2.78666	0.0438678	-1.66973
93	H09	L-003531-00	J-003531-09	RBM8A	9939	NM_005105	15812217	0.819178	0	0.819178	100	2.33474	0.746855	3.08159	75.764	0.477944	0.0831867	0.56113	85.1752	100	75.764	85.1752	85.1752	12.2184	0.0566302	-2.9717
94	H10	L-011327-00	J-011327-05	MAGOH	4116	NM_002370	6006021	4.87937	0.655316	5.53468	88.1598	8.21714	1.24862	9.46576	86.8091	4.6392	0.268407	4.90761	94.5308	88.1598	86.8091	94.5308	88.1598	4.12389	0.114364	-1.78427
95	H11	L-012278-00	J-012278-05	TCERG1	10915	NM_006706	21327714	2.3968	0.698407	3.0952	77.4358	9.85878	1.75419	11.613	84.8945	7.77591	1.22523	9.00115	86.388	77.4358	84.8945	86.388	84.8945	4.79592	0.000170926	-3.08334
96	H12	L-004074-00	J-004074-11	PRPF4B	8899	NM_176800	28872758	9.19904	1.2472	10.4462	88.0607	9.26797	0.930561	10.1985	90.8755	10.0191	0.928034	10.9471	91.5226	88.0607	90.8755	91.5226	90.8755	1.84057	0.12513	-0.703845
97	A01	-	-	No cells	-	-	-	0	0	0		0	0	0		0	0	0
98	A02	-	-	No cells	-	-	-	0	0	0		0	0	0		0	0	0
99	A03	L-003774-00	J-003774-05	DDX5	1655	NM_004396	13514826	4.9316	1.23189	6.16349	80.0131	3.06831	0.581716	3.65002	84.0627	11.5233	2.36221	13.8855	82.988	80.0131	84.0627	82.988	82.988	2.09776	4.01998e-05	-3.84186
100	A04	L-012190-00	J-012190-05	IK	3550	NM_006083	11038650	1.95149	1.06513	3.01662	64.6913	2.776	0.693795	3.4698	80.0047	1.24352	0.504121	1.74764	71.1542	64.6913	80.0047	71.1542	71.1542	7.6877	8.72148e-08	-8.54987
101	A05	L-005264-00	J-005264-06	PPM1G	5496	NM_002707	29826283	3.79004	0.720261	4.5103	84.0307	7.02724	0.745412	7.77265	90.4098	8.71862	0.969147	9.68777	89.9962	84.0307	90.4098	89.9962	89.9962	3.56955	0.0237135	-1.05369
102	A06	L-019598-00	J-019598-05	PABPC1	26986	NM_002568	56676313	4.79657	0.242152	5.03872	95.1942	10.9773	0.639721	11.617	94.4932	4.25843	0.359996	4.61842	92.2052	95.1942	94.4932	92.2052	94.4932	1.56313	0.829264	0.73543
103	A07	L-005158-01	J-005158-09	RBM17	84991	NM_032905	40255242	2.74199	0.271265	3.01325	90.9976	3.19734	0.288055	3.48539	91.7354	6.9539	0.511413	7.46531	93.1495	90.9976	91.7354	93.1495	91.7354	1.09351	0.463743	-0.361768
104	A08	L-019860-00	J-019860-05	HPRP8BP	9410	NM_004814	4758559	5.41992	0.271937	5.69186	95.2224	9.77638	1.08377	10.8601	90.0207	8.92305	0.987145	9.91019	90.0391	95.2224	90.0207	90.0391	90.0391	2.99788	0.425353	-1.03662
105	A09	L-020627-01	J-020627-09	DNAJC8	22826	NM_014280	7657610	2.40928	0.471995	2.88128	83.6185	8.62242	0.781848	9.40427	91.6862	6.21817	0.675525	6.8937	90.2008	83.6185	91.6862	90.2008	90.2008	4.29381	0.037159	-0.97227
106	A10	L-012708-00	J-012708-05	BCAS2	10286	NM_005872	49472833	3.33423	0.470494	3.80473	87.634	2.94362	0.482833	3.42646	85.9087	6.3267	1.31133	7.63803	82.8316	87.634	85.9087	82.8316	85.9087	2.43269	0.00119866	-2.67988
107	A11	L-014157-00	J-014157-05	ACIN1	22985	NM_014977	7662237	5.00481	0.304892	5.3097	94.2578	4.564	0.496945	5.06094	90.1808	10.5902	1.15603	11.7462	90.1582	94.2578	90.1808	90.1582	90.1808	2.36042	0.361302	-0.980247
108	A12	L-013625-00	J-013625-09	SHARP	23013	NM_015001	14790189	7.58734	0.688346	8.27569	91.6823	7.59511	0.63591	8.23102	92.2742	8.78065	0.663778	9.44443	92.9717	91.6823	92.2742	92.9717	92.2742	0.645439	0.567699	-0.147387
109	B01	-	-	Untransfected	-	-	-	2.66817	0.126082	2.79425	95.4878	7.42926	0.622498	8.05176	92.2688	4.92459	0.651462	5.57606	88.3168	95.4878	92.2688	88.3168	92.2688	3.59174	0.504686	-0.149544
110	B02	-	-	Untransfected	-	-	-	0.874862	0	0.874862	100	2.69589	0.292248	2.98814	90.2197	11.699	1.12148	12.8205	91.2524	100	90.2197	91.2524	91.2524	5.37339	0.893727	-0.553897
111	B03	L-016645-00	J-016645-05	HTATSF1	27336	NM_014500	34147671	5.44047	0.594734	6.03521	90.1456	4.39654	0.587666	4.98421	88.2094	11.3114	1.12209	12.4335	90.9752	90.1456	88.2094	90.9752	90.1456	1.41931	0.0884522	-0.994251
112	B04	L-011965-00	J-011965-05	RNPC2	9584	NM_004902	35493837	7.20241	2.13511	9.33752	77.1341	2.94415	1.05348	3.99764	73.6473	5.54254	1.77339	7.31593	75.7599	77.1341	73.6473	75.7599	75.7599	1.75639	5.48361e-08	-6.71751
113	B05	L-012334-01	J-012334-09	CPSF6	11052	NM_007007	5901927	3.86126	0.40285	4.26411	90.5525	4.55167	0.255062	4.80673	94.6936	4.58509	0.479955	5.06504	90.5242	90.5525	94.6936	90.5242	90.5525	2.39911	0.462626	-0.83235
114	B06	L-010854-00	J-010854-05	RBM15	64783	NM_022768	47933338	6.30971	0.424293	6.73401	93.6993	8.77752	0.4677	9.24522	94.9412	12.4937	1.05275	13.5465	92.2286	93.6993	94.9412	92.2286	93.6993	1.35787	0.956747	0.419554
115	B07	L-021186-01	J-021186-09	RBM22	55696	NM_018047	8922327	5.21406	0.397688	5.61175	92.9133	3.46211	0.311467	3.77358	91.7461	5.11382	0.551914	5.66573	90.2587	92.9133	91.7461	90.2587	91.7461	1.33049	0.379081	-0.357496
116	B08	L-003976-00	J-003976-05	IMP-3	10643	NM_006547	30795211	4.66283	0.316712	4.97954	93.6397	8.71728	0.804907	9.52219	91.547	13.8413	1.31613	15.1574	91.3169	93.6397	91.547	91.3169	91.547	1.27983	0.52576	-0.43669
117	B09	L-020189-00	J-020189-05	CIRBP	1153	NM_001280	4502846	6.09055	0.753219	6.84377	88.9941	20.7699	1.82472	22.5947	91.9241	13.7851	1.16696	14.9521	92.1953	88.9941	91.9241	92.1953	91.9241	1.77512	0.251546	-0.286675
118	B10	L-020762-00	J-020762-05	DDX48	9775	NM_014740	41327777	0.155812	0	0.155812	100	0.265943	0	0.265943	100	0.102881	0	0.102881	100	100	100	100	100	0	0.00523095	2.92627
119	B11	L-013450-01	J-013450-09	DDX17	10521	NM_030881	38201711	6.84769	0.466984	7.31467	93.6158	3.17314	0.301881	3.47502	91.3128	7.26145	0.640602	7.90205	91.8932	93.6158	91.3128	91.8932	91.8932	1.19775	0.558305	-0.298965
120	B12	L-011477-00	J-011477-05	DHX16	8449	NM_003587	21237727	4.71938	0.296618	5.016	94.0866	4.75426	0.19818	4.95244	95.9983	7.16523	0.663329	7.82855	91.5268	94.0866	95.9983	91.5268	94.0866	2.24358	0.865576	0.573639
121	C01	-	-	Mock SiRNA	-	-	-	0.905456	0	0.905456	100	3.57808	0.400934	3.97901	89.9238	5.88861	0.67195	6.56056	89.7577	100	89.9238	89.7577	89.9238	5.86603	0.906863	-1.08249
122	C02	-	-	Mock SiRNA	-	-	-	0.358134	0	0.358134	100	3.74976	0.364779	4.11453	91.1344	5.71384	0.770148	6.48399	88.1223	100	91.1344	88.1223	91.1344	6.17456	0.862298	-0.600869
123	C03	L-009950-00	J-009950-05	DHX9	1660	NM_030588	13514821	1.8437	0	1.8437	100	2.4582	0.300932	2.75913	89.0932	8.90618	1.14996	10.0561	88.5646	100	89.0932	88.5646	89.0932	6.45505	0.699211	-1.41292
124	C04	L-006874-00	J-006874-05	DDX3X	1654	NM_024005	13514816	0.783514	0	0.783514	100	3.82791	0.280984	4.1089	93.1616	8.03248	0.418468	8.45094	95.0483	100	93.1616	95.0483	95.0483	3.53184	0.254352	0.956251
125	C05	L-031902-01	J-031902-09	SKIV2L2	23517	NM_015360	39930352	2.43907	0.352048	2.79111	87.3868	3.62942	0.325229	3.95465	91.776	6.53883	0.968945	7.50777	87.0941	87.3868	91.776	87.0941	87.3868	2.62269	0.0374167	-2.0918
126	C06	L-015603-01	J-015603-09	DHX57	90957	NM_198963	39777585	4.80651	0.467804	5.27432	91.1305	8.78494	0.596743	9.38168	93.6393	7.31073	0.624608	7.93533	92.1288	91.1305	93.6393	92.1288	92.1288	1.26306	0.566709	-0.205249
127	C07	L-017196-01	J-017196-09	DHX30	22907	NM_138614	20336291	6.89099	0.4224	7.31339	94.2243	10.7513	0.67085	11.4221	94.1267	17.5176	1.70728	19.2249	91.1195	94.2243	94.1267	91.1195	94.1267	1.76509	0.867954	0.589626
128	C08	L-003768-01	J-003768-09	DHX32	55760	NM_018180	20336299	4.39466	0.200165	4.59482	95.6437	4.03195	0.387895	4.41985	91.2238	9.7952	0.9446	10.7398	91.2047	95.6437	91.2238	91.2047	91.2238	2.55737	0.704153	-0.565294
129	C09	L-017205-01	J-017205-09	DHX33	56919	NM_020162	20336301	2.73677	0	2.73677	100	6.96018	0.630408	7.59059	91.6949	8.74192	0.715103	9.45703	92.4384	100	91.6949	92.4384	92.4384	4.5954	0.600707	-0.0820723
130	C10	L-011842-01	J-011842-09	DDX10	1662	NM_004398	13514830	2.39456	0.184014	2.57858	92.8637	2.92573	0.303211	3.22895	90.6096	4.30778	0.328447	4.63623	92.9157	92.8637	90.6096	92.9157	92.8637	1.31668	0.514341	0.0871535
131	C11	L-010397-01	J-010397-09	DDX24	57062	NM_020414	14251213	7.21817	0.496943	7.71511	93.5588	8.15305	0.501104	8.65416	94.2097	11.5046	0.88272	12.3874	92.874	93.5588	94.2097	92.874	93.5588	0.667896	0.985257	0.363689
132	C12	L-012766-01	J-012766-09	DDX52	11056	NM_007010	38569504	12.1783	0.66109	12.8394	94.8511	4.61694	0.528879	5.14582	89.7222	3.39218	0.379548	3.77173	89.937	94.8511	89.7222	89.937	89.937	2.90115	0.36054	-1.07722
133	D01	L-015333-00	J-015333-05	DIS3L	115752	NM_133375	34147483	1.14585	0	1.14585	100	3.24987	0.236404	3.48628	93.219	3.14879	0.293729	3.44252	91.4676	100	93.219	91.4676	93.219	4.5065	0.545242	0.228489
134	D02	L-003881-00	J-003881-06	DEK	7913	NM_003472	31542502	1.20576	0.194911	1.40067	86.0845	3.29236	0.23711	3.52947	93.282	5.49691	0.646113	6.14303	89.4822	86.0845	93.282	89.4822	89.4822	3.60063	0.0906059	-1.25819
135	D03	L-012931-01	J-012931-09	DDX31	64794	NM_138620	20336297	0.885922	0.0940706	0.979993	90.4009	1.84032	0	1.84032	100	9.22226	0.77901	10.0013	92.2109	90.4009	100	92.2109	92.2109	5.10048	0.766043	-0.172583
136	D04	L-011843-00	J-011843-05	DDX11	1663	NM_004399	4758135	1.57195	0	1.57195	100	2.22905	0.0822403	2.31129	96.4418	9.74094	0.597229	10.3382	94.2231	100	96.4418	94.2231	96.4418	2.91423	0.130997	1.51066
137	D05	L-017202-01	J-017202-09	DDX28	55794	NM_018380	20336295	3.87945	0	3.87945	100	4.11598	0.306114	4.4221	93.0776	8.14894	0.41234	8.56128	95.1837	100	93.0776	95.1837	95.1837	3.54851	0.251526	1.01012
138	D06	L-033292-00	J-033292-01	DDX12	440081	XM_495908	51471183	11.4821	1.09485	12.5769	91.2947	6.80312	0.545758	7.34887	92.5736	6.16281	0.474324	6.63713	92.8535	91.2947	92.5736	92.8535	92.5736	0.831004	0.546419	-0.0282881
139	D07	L-022008-01	J-022008-09	TDRD9	122402	NM_153046	42734387	9.29849	0.507979	9.80647	94.82	6.33617	0.0944447	6.43062	98.5313	3.28437	0.467718	3.75209	87.5345	94.82	98.5313	87.5345	94.82	5.59439	0.959893	0.865421
140	D08	L-021627-01	J-021627-09	LOC164045	164045	NM_001017975	63025209	4.52777	0.235037	4.76281	95.0651	3.15173	0.109758	3.26149	96.6347	8.56746	0.545394	9.11285	94.0151	95.0651	96.6347	94.0151	95.0651	1.31836	0.415064	0.962967
141	D09	L-014162-00	J-014162-05	MOV10	4343	NM_020963	14211539	2.78377	0.242041	3.02581	92.0008	8.19294	0.861619	9.05455	90.4841	7.28823	0.833662	8.1219	89.7356	92.0008	90.4841	89.7356	90.4841	1.15409	0.197161	-0.85956
142	D10	L-004914-01	J-004914-09	XAB2	56949	NM_020196	55770905	2.45448	0.842657	3.29714	74.4428	0.253026	0.148582	0.401608	63.0033	0.2762	0	0.2762	100	74.4428	63.0033	100	74.4428	18.942	0.00375669	-7.24151
143	D11	L-019911-00	J-019911-05	THOC1	9984	NM_005131	4826881	7.43009	1.07882	8.50891	87.3212	3.46244	0.259877	3.72232	93.0184	5.61356	0.835942	6.4495	87.0387	87.3212	93.0184	87.0387	87.3212	3.3738	0.0575955	-2.1179
144	D12	L-015383-00	J-015383-05	LUC7A	51747	NM_006107	52426742	2.4849	0.0556647	2.54057	97.809	2.2554	0.109703	2.3651	95.3616	2.44333	0	2.44333	100	97.809	95.3616	100	97.809	2.32038	0.0604341	2.05458
145	E01	L-003486-00	J-003486-11	EP300	2033	NM_001429	50345996	2.87328	0.208442	3.08172	93.2362	1.943	0.203459	2.14646	90.5212	2.53895	0.248772	2.78773	91.0762	93.2362	90.5212	91.0762	91.0762	1.43439	0.372719	-0.624028
146	E02	L-009722-00	J-009722-05	KAT2A	2648	NM_021078	10835100	4.34787	0.229604	4.57747	94.984	2.2014	0.0815143	2.28291	96.4294	7.26842	0.514916	7.78333	93.3844	94.984	96.4294	93.3844	94.984	1.52315	0.502203	0.930702
147	E03	L-023101-02	J-023101-17	KIAA1604	57703	NM_020943	153792116	0	0	0		0	0	0		0.34496	0	0.34496	100			100	100			2.92627
148	E04	L-029452-00	J-029452-05	FUBP3	8939	XM_932775	89030022	10.5893	0.711333	11.3006	93.7054	2.92291	0.371441	3.29435	88.7249	3.8587	0.198277	4.05698	95.1127	93.7054	88.7249	95.1127	93.7054	3.35632	0.651541	0.421984
149	E05	L-018424-01	J-018424-09	MGC2655	79228	NM_024339	31543163	1.52441	0.229473	1.75388	86.9163	1.74639	0.121231	1.86763	93.5088	2.92348	0.285069	3.20855	91.1153	86.9163	93.5088	91.1153	91.1153	3.33723	0.182779	-0.608448
150	E06	L-004031-00	J-004031-09	CRK7	51755	NM_016507	7706548	3.47895	0.437187	3.91614	88.8363	6.52319	0.681432	7.20463	90.5417	9.25573	1.01934	10.2751	90.0795	88.8363	90.5417	90.0795	90.0795	0.882036	0.0900941	-1.02053
151	E07	L-019966-02	J-019966-17	TFIP11	24144	NM_012143	56788354	1.8883	0.144909	2.03321	92.8729	4.95407	0.709337	5.6634	87.4751	4.52253	0.381135	4.90367	92.2276	92.8729	87.4751	92.2276	92.2276	2.94785	0.231249	-0.16595
152	E08	L-012335-01	J-012335-09	CPSF5	11051	NM_007006	59889569	4.8026	0.482492	5.28509	90.8707	5.54628	0.32799	5.87427	94.4165	9.73783	1.00171	10.7395	90.6727	90.8707	94.4165	90.6727	90.8707	2.10665	0.477774	-0.705773
153	E09	L-014879-01	J-014879-09	THOC3	84321	NM_032361	14150170	12.1887	0.713539	12.9022	94.4697	7.1264	0.595111	7.72151	92.2928	7.5145	0.764737	8.27923	90.7632	94.4697	92.2928	90.7632	92.2928	1.86263	0.638073	-0.139987
154	E10	L-031204-01	J-031204-15	C19ORF29	58509	NM_021231	126723148	7.39313	0.978628	8.37176	88.3104	0.474336	0	0.474336	100	3.50526	0.413742	3.919	89.4427	88.3104	100	89.4427	89.4427	6.44705	0.708598	-1.2739
155	E11	L-018665-01	J-018665-09	G10	8896	NM_003910	32171174	2.75576	0.183651	2.93941	93.7521	1.80911	0.108553	1.91766	94.3393	6.25694	0.545327	6.80227	91.9832	93.7521	94.3393	91.9832	93.7521	1.22646	0.942812	0.440582
156	E12	L-019557-00	J-019557-05	ZNF207	7756	NM_001032293	73808089	3.34799	0.298964	3.64695	91.8024	3.09101	0.16197	3.25298	95.0209	4.46709	0.241496	4.70858	94.8711	91.8024	95.0209	94.8711	94.8711	1.81652	0.854296	0.885783
157	F01	L-006301-00	J-006301-08	KAT5	10524	NM_182709	36287059	3.78851	0.345725	4.13423	91.6375	5.22171	0.271318	5.49303	95.0607	2.64289	0.137676	2.78057	95.0487	91.6375	95.0607	95.0487	95.0487	1.97291	0.848249	0.956405
158	F02	L-004130-00	J-004130-05	CARM1	10498	NM_199141	40288287	3.10323	0.214825	3.31805	93.5256	5.22986	0.49493	5.72479	91.3546	6.8159	0.318052	7.13395	95.5417	93.5256	91.3546	95.5417	93.5256	2.09402	0.986916	0.350459
159	F03	L-019234-01	J-019234-09	ARS2	51593	NM_015908	58331217	9.46534	1.16185	10.6272	89.0672	6.88462	0.529089	7.41371	92.8634	16.4501	1.57959	18.0297	91.239	89.0672	92.8634	91.239	91.239	1.90467	0.256044	-0.559248
160	F04	L-025006-01	J-025006-09	THOC2	57187	NM_020449	52486998	5.79086	0.744992	6.53585	88.6014	0.520015	0.0981058	0.618121	84.1284	1.3004	0.0757726	1.37617	94.494	88.6014	84.1284	94.494	88.6014	5.19896	0.0702244	-1.60858
161	F05	L-015317-01	J-015317-09	C22ORF19	8563	NM_003678	50959084	0.297821	0	0.297821	100	3.45771	0.370619	3.82833	90.3191	5.98978	0.752263	6.74204	88.8422	100	90.3191	88.8422	90.3191	6.06078	0.851353	-0.925237
162	F06	L-014575-01	J-014575-09	NIF3L1BP1	80145	NM_025075	13376622	2.69054	0.27552	2.96606	90.7109	0.894241	0.0961905	0.990431	90.288	5.20486	0.601554	5.80641	89.6398	90.7109	90.288	89.6398	90.288	0.539468	0.126314	-0.937586
163	F07	L-014974-02	J-014974-17	MGC13125	84811	NM_032725	39725657	3.8858	0.269461	4.15527	93.5152	4.92701	0.447558	5.37456	91.6727	5.90402	0.833862	6.73789	87.6243	93.5152	91.6727	87.6243	91.6727	3.01351	0.245702	-0.386709
164	F08	L-017323-00	J-017323-05	WTAP	9589	NM_152857	23199973	6.16746	0.532399	6.69986	92.0536	9.48305	0.590813	10.0739	94.1352	10.0694	0.664122	10.7335	93.8126	92.0536	94.1352	93.8126	93.8126	1.12037	0.933503	0.464662
165	F09	L-012984-02	J-012984-17	C21ORF66	94104	NM_058191	125661050	4.20334	0.610706	4.81404	87.3141	3.00589	0.304662	3.31055	90.7973	0	0	0		87.3141	90.7973		89.0557	2.46298	0.0995476	-1.42787
166	F10	L-019278-02	J-019278-17	DKFZP434I116	25962	NM_183009	33946279	13.457	1.19327	14.6503	91.8549	1.29485	0	1.29485	100	9.03837	0.931112	9.96948	90.6604	91.8549	100	90.6604	91.8549	5.08261	0.776396	-0.314194
167	F11	L-013894-01	J-013894-09	KIAA1160	57461	NM_020701	20149303	8.07001	1.15117	9.22117	87.516	4.48369	0.367853	4.85154	92.4178	4.99664	0.558161	5.55481	89.9517	87.516	92.4178	89.9517	89.9517	2.45091	0.110254	-1.07137
168	F12	L-020788-02	J-020788-17	HSPC148	51503	NM_016403	148833501	0.657736	0	0.657736	100	1.41673	0	1.41673	100	2.54348	0.311788	2.85527	89.0803	100	100	89.0803	100	6.30452	0.253565	2.92627
169	G01	L-015817-00	J-015817-06	PRMT5	10419	NM_006109	20070219	1.49752	0.101704	1.59923	93.6404	2.0592	0	2.0592	100	3.86715	0.21467	4.08181	94.7408	93.6404	100	94.7408	94.7408	3.39886	0.242456	0.83394
170	G02	L-004937-00	J-004937-06	BRD4	23476	NM_014299	7657217	4.43297	0.0949286	4.5279	97.9035	1.94296	0.0815308	2.02449	95.9728	6.76403	0.313652	7.07768	95.5684	97.9035	95.9728	95.5684	95.9728	1.2479	0.16798	1.32406
171	G03	L-012310-01	J-012310-09	DGCR14	8220	NM_022719	13027629	2.62005	0.209858	2.82991	92.5843	4.71966	0.446621	5.16628	91.3551	5.26444	0.308239	5.57268	94.4688	92.5843	91.3551	94.4688	92.5843	1.56829	0.738267	-0.0240362
172	G04	L-020289-02	J-020289-17	GTL3	29105	NM_013242	42716281	1.8591	0.137068	1.99617	93.1335	0.764964	0	0.764964	100	1.71496	0.0944654	1.80943	94.7793	93.1335	100	94.7793	94.7793	3.58501	0.273315	0.849233
173	G05	L-014270-02	J-014270-18	MGC2803	79002	NM_024038	34147352	5.94542	0.522215	6.46764	91.9257	3.44639	0.414976	3.86136	89.2531	4.95269	0.399142	5.35183	92.542	91.9257	89.2531	92.542	91.9257	1.74829	0.290965	-0.286037
174	G06	L-012314-02	J-012314-17	HNRPA0	10949	NM_006805	52426775	9.61795	0.856898	10.4748	91.8195	5.15861	0.351149	5.50976	93.6268	0.821772	0.109023	0.930795	88.2871	91.8195	93.6268	88.2871	91.8195	2.71586	0.301153	-0.328306
175	G07	L-008221-00	J-008221-09	HNRPA1	3178	NM_002136	83641893	7.26572	0.880361	8.14608	89.1928	10.0982	0.892912	10.9911	91.8761	11.0932	1.28455	12.3778	89.6221	89.1928	91.8761	89.6221	89.6221	1.44131	0.131288	-1.2025
176	G08	L-011690-01	J-011690-09	HNRPA2B1	3181	NM_002137	14043073	1.62242	0.199628	1.82204	89.0437	1.53102	0.105941	1.63696	93.5282	1.62953	0.15101	1.78054	91.5189	89.0437	93.5282	91.5189	91.5189	2.24626	0.321595	-0.447891
177	G09	L-019347-00	J-019347-05	HNRNPA3	220988	NM_194247	34740328	9.02658	1.02444	10.051	89.8076	6.92008	0.278908	7.19899	96.1257	0.731856	0	0.731856	100	89.8076	96.1257	100	96.1257	5.14479	0.44423	1.38492
178	G10	L-011869-01	J-011869-09	HNRPC	3183	NM_004500	14110430	10.1918	0.335189	10.527	96.8159	2.43585	0.224897	2.66075	91.5476	4.8595	0.165777	5.02527	96.7011	96.8159	91.5476	96.7011	96.7011	3.00906	0.489541	1.61383
179	G11	L-004079-00	J-004079-05	HNRPD	3184	NM_001003810	51477707	3.13898	0.354962	3.49394	89.8407	3.85658	0.383982	4.24056	90.945	5.69473	0.500945	6.19567	91.9146	89.8407	90.945	91.9146	90.945	1.0377	0.222617	-0.676199
180	G12	L-003528-00	J-003528-06	PTBP1	5725	NM_175847	28558997	7.20254	1.47814	8.68068	82.972	1.27814	0.335364	1.61351	79.2152	3.21519	1.08587	4.30106	74.7534	82.972	79.2152	74.7534	79.2152	4.11436	2.88673e-06	-5.34282
181	H01	L-020165-00	J-020165-07	CTCF	10664	NM_006565	62952500	2.41702	0	2.41702	100	1.50848	0.0756078	1.58409	95.2271	4.51424	0.306483	4.82073	93.6424	100	95.2271	93.6424	95.2271	3.30937	0.214314	1.02738
182	H02	L-008529-00	J-008529-05	CHD1	1105	NM_001270	68299794	0.723913	0	0.723913	100	3.1991	0.334731	3.53383	90.5278	4.5771	0.385412	4.96251	92.2335	100	90.5278	92.2335	92.2335	5.04892	0.749357	-0.16357
183	H03	L-011692-00	J-011692-05	HNRPK	3190	NM_031263	14165436	1.62831	0	1.62831	100	0.250878	0	0.250878	100	2.76054	0	2.76054	100	100	100	100	100	0	0.00523095	2.92627
184	H04	L-011293-01	J-011293-09	HNRPL	3191	NM_001005335	52632384	3.38011	0.124299	3.50441	96.4531	0.441393	0	0.441393	100	1.61277	0.151335	1.76411	91.4214	96.4531	100	91.4214	96.4531	4.31064	0.286936	1.51514
185	H05	L-010905-01	J-010905-09	HNRPR	10236	NM_005826	14141188	0.711952	0.0979637	0.809916	87.9045	2.50481	0.195011	2.69982	92.7769	3.37097	0.250199	3.62116	93.0906	87.9045	92.7769	93.0906	92.7769	2.9079	0.306109	0.0525894
186	H06	L-012392-01	J-012392-09	RALY	22913	NM_007367	21396479	3.38647	0.260064	3.64653	92.8682	2.94855	0.219996	3.16855	93.0569	1.8462	0.126208	1.97241	93.6013	92.8682	93.0569	93.6013	93.0569	0.380676	0.873114	0.163993
187	H07	L-009497-00	J-009497-07	FUS	2521	NM_001010850	58218972	12.6811	0.418025	13.0991	96.8088	5.54256	0.400463	5.94302	93.2616	7.26652	0.601968	7.86849	92.3496	96.8088	93.2616	92.3496	93.2616	2.35576	0.768405	0.245447
188	H08	L-012442-00	J-012442-06	ILF3	3609	NM_153464	24234755	2.65807	0.112906	2.77098	95.9254	9.13755	0.421754	9.55931	95.588	4.46412	0.27389	4.73801	94.2193	95.9254	95.588	94.2193	95.588	0.903506	0.411479	1.17099
189	H09	L-017599-00	J-017599-05	ILF2	3608	NM_004515	24234746	5.59485	0.395535	5.99039	93.3972	3.79224	0.278212	4.07045	93.1651	2.9627	0.357791	3.32049	89.2248	93.3972	93.1651	89.2248	93.1651	2.34482	0.463653	0.207035
190	H10	L-016218-00	J-016218-05	SYNCRIP	10492	NM_006372	23397426	7.26599	0.553447	7.81943	92.9222	0.780046	0	0.780046	100	1.43543	0	1.43543	100	92.9222	100	100	100	4.08639	0.0780409	2.92627
191	H11	L-017382-00	J-017382-05	MATR3	9782	NM_018834	62750352	17.1182	1.25444	18.3726	93.1722	3.2945	0.503521	3.79802	86.7426	6.63206	0.600002	7.23207	91.7036	93.1722	86.7426	91.7036	91.7036	3.36921	0.18682	-0.374411
192	H12	L-006826-00	J-006826-05	BUB3	9184	NM_001007793	56550080	4.29346	0.57025	4.86371	88.2754	2.18943	0.239965	2.4294	90.1225	4.4686	0.489598	4.9582	90.1255	88.2754	90.1225	90.1255	90.1225	1.06727	0.0682502	-1.00345
193	A01	-	-	No cells	-	-	-	0	0	0		0	0	0		0	0	0
194	A02	-	-	No cells	-	-	-	0	0	0		0	0	0		0	0	0
195	A03	L-003773-00	J-003773-08	ELAVL1	1994	NM_001419	38201713	12.0409	1.15056	13.1915	91.278	13.0074	1.16203	14.1695	91.799	3.06181	0.41438	3.47619	88.0795	91.278	91.799	88.0795	91.278	2.01399	0.153021	-0.543733
196	A04	L-008930-00	J-008930-06	TAF15	8148	NM_139215	21327700	6.63615	0.36833	7.00448	94.7415	3.81012	0.147168	3.95729	96.2811	1.00956	0.116556	1.12612	89.6497	94.7415	96.2811	89.6497	94.7415	3.47062	0.982421	0.834208
197	A05	L-010213-00	J-010213-06	YBX1	4904	NM_004559	34098945	2.99495	0.183918	3.17887	94.2144	2.20123	0.104266	2.30549	95.4775	1.35434	0.173401	1.52774	88.6499	94.2144	95.4775	88.6499	94.2144	3.63263	0.742612	0.624485
198	A06	L-015793-00	J-015793-05	CSDA	8531	NM_003651	21359983	8.50893	0.735424	9.24436	92.0446	7.58719	0.584324	8.17151	92.8493	1.82902	0.174254	2.00327	91.3015	92.0446	92.8493	91.3015	92.0446	0.774074	0.49278	-0.238731
199	A07	L-005168-00	J-005168-06	HSPA1A	3303	NM_005345	26787973	5.10294	0.520772	5.62371	90.7397	4.02103	0.297994	4.31902	93.1004	2.41513	0	2.41513	100	90.7397	93.1004	100	93.1004	4.81196	0.633176	0.181315
200	A08	L-017609-00	J-017609-06	HSPA8	3312	NM_153201	24234685	7.07878	0.286464	7.36524	96.1106	12.8717	1.2215	14.0932	91.3327	0.94997	0.127159	1.07713	88.1946	96.1106	91.3327	88.1946	91.3327	3.98618	0.470049	-0.52197
201	A09	L-013449-01	J-013449-09	HNRPF	3185	NM_004966	14141150	5.93308	0.337657	6.27074	94.6153	6.88031	0.443398	7.32371	93.9457	1.04416	0	1.04416	100	94.6153	93.9457	100	94.6153	3.31907	0.231182	0.784017
202	A10	L-012107-00	J-012107-05	HNRPH1	3187	NM_005520	5031752	2.03639	0	2.03639	100	2.74636	0.105256	2.85161	96.3089	0.614203	0	0.614203	100	100	96.3089	100	100	2.13107	0.0216716	2.92627
203	A11	L-012440-01	J-012440-09	HNRPH3	3189	NM_021644	14141158	4.60971	0.660226	5.26993	87.4718	9.34517	0.784085	10.1293	92.2592	0.936904	0.140133	1.07704	86.989	87.4718	92.2592	86.989	87.4718	2.91339	0.044692	-2.05798
204	A12	L-013245-02	J-013245-17	HNRPH2	3188	NM_001032393	74099696	2.35413	0	2.35413	100	1.25367	0	1.25367	100	1.37635	0.0761	1.45245	94.7606	100	100	94.7606	100	3.02499	0.0396179	2.92627
205	B01	-	-	Untransfected	-	-	-	15.3512	1.5841	16.9353	90.6462	9.43725	0.439885	9.87714	95.5464	3.6315	0	3.6315	100	90.6462	95.5464	100	95.5464	4.67868	0.414851	1.15444
206	B02	-	-	Untransfected	-	-	-	8.4047	0.767329	9.17203	91.634	7.12331	0.597917	7.72123	92.2562	3.38262	0.360197	3.74282	90.3763	91.634	92.2562	90.3763	91.634	0.957681	0.325506	-0.402081
207	B03	L-013501-00	J-013501-05	HNRPU	3192	NM_004501	74229006	5.81987	0.267909	6.08778	95.5992	3.00238	0.167629	3.17001	94.712	1.11039	0	1.11039	100	95.5992	94.712	100	95.5992	2.83186	0.143362	1.17545
208	B04	L-008198-00	J-008198-06	HSPA5	3309	NM_005347	21361242	5.21229	0.112596	5.32488	97.8855	6.14972	0.468703	6.61842	92.9182	1.02279	0.281731	1.30452	78.4035	97.8855	92.9182	78.4035	92.9182	10.1234	0.209357	0.10882
209	B05	L-020019-00	J-020019-05	KHDRBS1	10657	NM_006559	5730026	2.02419	0.561271	2.58546	78.2913	7.79853	0.883278	8.68181	89.8261	0.556772	0	0.556772	100	78.2913	89.8261	100	89.8261	10.8615	0.185504	-1.12135
210	B06	L-004839-00	J-004839-09	SRPK2	6733	NM_182692	33188448	5.93935	0.136363	6.07571	97.7556	4.47065	0.762992	5.23365	85.4214	2.63387	0.30984	2.94371	89.4745	97.7556	85.4214	89.4745	89.4745	6.28671	0.291546	-1.26123
211	B07	L-009065-01	J-009065-09	RBM10	8241	NM_152856	23111017	3.12919	0.110683	3.23987	96.5837	3.2278	0.29581	3.52361	91.6049	1.90603	0.137929	2.04396	93.2519	96.5837	91.6049	93.2519	93.2519	2.53647	0.887333	0.24157
212	B08	L-003483-00	J-003483-09	DICER1	23405	NM_030621	29294648	8.32163	0.307327	8.62895	96.4384	15.5196	1.42715	16.9467	91.5786	3.76011	0.225852	3.98596	94.3338	96.4384	91.5786	94.3338	94.3338	2.43715	0.777006	0.672012
213	B09	L-005119-00	J-005119-11	EWSR1	2130	NM_013986	7669489	2.31194	0.332059	2.644	87.441	0.874454	0.116643	0.991097	88.2309	0.153527	0	0.153527	100	87.441	88.2309	100	88.2309	7.03401	0.525582	-1.75599
214	B10	L-020032-00	J-020032-05	RBM6	10180	NM_005777	5032032	1.93331	0.155295	2.0886	92.5646	4.66909	0.566161	5.23525	89.1856	2.49796	0.306762	2.80472	89.0627	92.5646	89.1856	89.0627	89.1856	1.98733	0.13911	-1.37617
215	B11	L-009220-00	J-009220-07	RBM5	10181	NM_005778	5032030	4.13308	0.171021	4.3041	96.0266	1.38739	0.207424	1.59481	86.9938	1.09449	0.145321	1.23982	88.2788	96.0266	86.9938	88.2788	88.2788	4.88653	0.19383	-1.73694
216	B12	L-013042-00	J-013042-05	TIA1	7072	NM_022037	11863160	6.98009	0.463241	7.44333	93.7764	13.8986	1.30223	15.2008	91.4331	3.02533	0.206417	3.23175	93.6128	93.7764	91.4331	93.6128	93.6128	1.30823	0.78724	0.385179
217	C01	-	-	Mock SiRNA	-	-	-	7.05565	1.13013	8.18579	86.1939	6.73214	0.483084	7.21522	93.3046	0.840738	0.142485	0.983223	85.5083	86.1939	93.3046	85.5083	86.1939	4.31692	0.0320447	-2.56639
218	C02	-	-	Mock SiRNA	-	-	-	9.14767	0.739717	9.88739	92.5186	9.76149	1.03727	10.7988	90.3945	1.6326	0.244544	1.87715	86.9725	92.5186	90.3945	86.9725	90.3945	2.79822	0.113021	-0.895203
219	C03	L-011405-00	J-011405-05	TIAL1	7073	NM_003252	77695910	9.87888	1.22289	11.1018	88.9848	2.81181	0.108335	2.92015	96.2901	1.46605	0.409401	1.87545	78.1706	88.9848	96.2901	78.1706	88.9848	9.11621	0.0533544	-1.45608
220	C04	L-027984-01	J-027984-09	FNBP3	55660	XM_938514	88957852	3.66623	0.296564	3.96279	92.5163	3.25379	0.547459	3.80125	85.5979	0.0604397	0	0.0604397	100	92.5163	85.5979	100	92.5163	7.20289	0.753318	-0.0510776
221	C05	L-021976-00	J-021976-05	RBM25	58517	NM_021239	55741708	5.01658	0.908922	5.9255	84.6608	5.35441	1.5631	6.91751	77.4037	0.0801102	0	0.0801102	100	84.6608	77.4037	100	84.6608	11.5365	0.0626799	-3.17632
222	C06	L-023607-02	J-023607-18	SR140	23350	NM_001080415	122937226	8.6994	0.527932	9.22733	94.2786	8.76449	0.465208	9.2297	94.9597	2.66397	0.103076	2.76705	96.2749	94.2786	94.9597	96.2749	94.9597	1.01478	0.431607	0.921002
223	C07	L-016176-02	J-016176-17	CHERP	10523	NM_006387	119226259	3.66781	0	3.66781	100	2.62589	0.202442	2.82833	92.8423	0.510765	0	0.510765	100	100	92.8423	100	100	4.13247	0.0802613	2.92627
224	C08	L-013828-02	J-013828-17	CCAR1	55749	NM_018237	46852387	5.97215	0	5.97215	100	6.65527	0.553324	7.20859	92.3241	1.0338	0.0873753	1.12117	92.2068	100	92.3241	92.2068	92.3241	4.46594	0.559678	-0.127543
225	C09	L-019907-00	J-019907-05	THRAP3	9967	NM_005119	52856402	7.37111	0.458388	7.82949	94.1454	6.46239	0.719067	7.18146	89.9872	0.871622	0	0.871622	100	94.1454	89.9872	100	94.1454	5.03031	0.606715	0.597037
226	C10	L-012385-02	J-012385-18	WBP4	11193	NM_007187	21536424	2.5474	0.434493	2.98189	85.429	4.96347	0.75514	5.71861	86.795	1.29067	0.160227	1.45089	88.9567	85.429	86.795	88.9567	86.795	1.77876	0.00608047	-2.32725
227	C11	L-020071-02	J-020071-18	MFAP1	4236	NM_005926	50726967	2.11556	0.552097	2.66766	79.3041	0.969517	0.125405	1.09492	88.5467	0.300494	0.21086	0.511353	58.7644	79.3041	88.5467	58.7644	79.3041	15.2441	0.000112148	-5.30747
228	C12	L-021129-01	J-021129-09	SMU1	55234	NM_018225	8922678	2.82672	0.856697	3.68342	76.7418	0.0485116	0	0.0485116	100	0.475723	0	0.475723	100	76.7418	100	100	100	13.4281	0.715375	2.92627
229	D01	L-006379-01	J-006379-09	MORF4L1	10933	NM_006791	45643136	11.1281	0.826563	11.9547	93.0859	3.73361	0.464332	4.19794	88.939	0.691356	0	0.691356	100	93.0859	88.939	100	93.0859	5.58787	0.833856	0.175524
230	D02	L-003493-00	J-003493-10	HDAC1	3065	NM_004964	13128859	8.89938	0.660792	9.56017	93.0881	10.9542	1.15722	12.1114	90.4452	0.419234	0	0.419234	100	93.0881	90.4452	100	93.0881	4.93377	0.666253	0.176401
231	D03	L-017535-00	J-017535-05	CTNNBL1	56259	NM_030877	29570786	8.67848	0.625822	9.3043	93.2738	9.26796	0.833757	10.1017	91.7464	2.23827	0.101442	2.33971	95.6643	93.2738	91.7464	95.6643	93.2738	1.97476	0.980236	0.250306
232	D04	L-022214-01	J-022214-09	AQR	9716	NM_014691	58374127	0.556543	0	0.556543	100	8.5799	1.11102	9.69091	88.5355	2.59439	0.238785	2.83318	91.5718	100	88.5355	91.5718	91.5718	5.93983	0.953843	-0.426828
233	D05	L-012716-01	J-012716-09	PQBP1	10084	NM_001032385	74027258	7.72209	0.564486	8.28658	93.1879	9.37095	0.673933	10.0449	93.2908	5.30901	0.337877	5.64689	94.0166	93.1879	93.2908	94.0166	93.2908	0.451661	0.996004	0.257046
234	D06	L-013343-00	J-013343-05	WBP11	51729	NM_016312	18375679	11.633	4.23958	15.8726	73.2899	4.66148	1.67653	6.33801	73.548	1.96923	0.283808	2.25304	87.4033	73.2899	73.548	87.4033	73.548	8.07495	1.18206e-05	-7.59752
235	D07	L-012460-00	J-012460-05	KIN	22944	NM_012311	40068516	8.439	0.48936	8.92836	94.519	6.625	0.681982	7.30698	90.6667	2.0674	0.110079	2.17747	94.9446	94.519	90.6667	94.9446	94.519	2.35663	0.950802	0.745698
236	D08	L-010394-00	J-010394-05	DDX41	51428	NM_016222	21071031	4.14541	0.288145	4.43356	93.5008	5.74029	0.543034	6.28333	91.3575	2.06569	0.25788	2.32357	88.9016	93.5008	91.3575	88.9016	91.3575	2.30138	0.298546	-0.512084
237	D09	L-013901-02	J-013901-17	FLJ22965	63932	NM_022101	34147219	8.01246	0.580739	8.5932	93.2419	13.2915	1.18874	14.4802	91.7906	0.608089	0	0.608089	100	93.2419	91.7906	100	93.2419	4.38126	0.510813	0.23759
238	D10	L-020239-01	J-020239-09	P29	25949	NM_207170	83777577	11.6039	1.08338	12.6873	91.4609	15.2624	1.06802	16.3304	93.4599	3.70809	0.361261	4.06935	91.1224	91.4609	93.4599	91.1224	91.4609	1.26324	0.479971	-0.470962
239	D11	L-013065-01	J-013065-09	DHX35	60625	NM_021931	20544128	4.20752	0.280801	4.48832	93.7437	3.9096	0.306587	4.21619	92.7283	0.87997	0.133176	1.01315	86.8552	93.7437	92.7283	86.8552	92.7283	3.71882	0.287195	0.0332819
240	D12	L-031204-01	J-031204-15	C19ORF29	58509	NM_021231	126723148	7.11833	1.1065	8.22483	86.5468	0.298163	0	0.298163	100	0.511907	0.0950202	0.606927	84.3441	86.5468	100	84.3441	86.5468	8.47496	0.245294	-2.426
241	E01	L-003540-00	J-003540-09	SIRT1	23411	NM_012238	13775598	9.29602	0.76179	10.0578	92.4259	2.32449	0.11175	2.43624	95.413	3.61223	0.276611	3.88884	92.887	92.4259	95.413	92.887	92.887	1.60811	0.974904	0.0964214
242	E02	L-003495-00	J-003495-06	HDAC2	3066	NM_001527	4557640	13.7015	1.19519	14.8967	91.9768	6.29974	0.711692	7.01143	89.8496	1.92316	0.151406	2.07456	92.7018	91.9768	89.8496	92.7018	91.9768	1.48245	0.348495	-0.265711
243	E03	L-016456-02	J-016456-21	FLJ35382	163859	NM_152608	148664215	2.19722	0.142852	2.34007	93.8954	14.1915	0.92005	15.1116	93.9116	1.43809	0	1.43809	100	93.8954	93.9116	100	93.9116	3.51982	0.279095	0.504039
244	E04	L-020231-02	J-020231-18	C9ORF78	51759	NM_016520	118498335	5.66712	0.304234	5.97136	94.9051	1.17273	0.13795	1.31068	89.4749	1.40759	0.0924487	1.50004	93.8369	94.9051	89.4749	93.8369	93.8369	2.87677	0.722874	0.474325
245	E05	L-007204-00	J-007204-05	NOSIP	51070	NM_015953	34147607	4.92368	0.301818	5.22549	94.2241	0.776459	0	0.776459	100	1.21749	0.122893	1.34039	90.8315	94.2241	100	90.8315	94.2241	4.63557	0.512534	0.628371
246	E06	L-014332-00	J-014332-05	LENG1	79165	NM_024316	24308288	4.66222	0.424017	5.08624	91.6635	4.0609	0.47376	4.53466	89.5525	0.294583	0	0.294583	100	91.6635	89.5525	100	91.6635	5.52426	0.922888	-0.390377
247	E07	L-014860-00	J-014860-05	MORG1	84292	NM_032332	39725650	8.27145	0.750703	9.02215	91.6793	16.5299	0.947729	17.4777	94.5775	3.5769	0.175602	3.7525	95.3204	91.6793	94.5775	95.3204	94.5775	1.92391	0.869007	0.768951
248	E08	L-015142-01	J-015142-09	MGC20398	91603	NM_052857	49472813	7.04021	0.728108	7.76832	90.6272	8.63666	1.06279	9.69945	89.0427	1.81183	0.166115	1.97795	91.6016	90.6272	89.0427	91.6016	90.6272	1.29151	0.153461	-0.80264
249	E09	L-015455-02	J-015455-13	MGC23918	151903	NM_144716	142348393	4.13095	0.187391	4.31834	95.6606	0.920435	0.0793996	0.999835	92.0587	0.543874	0	0.543874	100	95.6606	92.0587	100	95.6606	3.97634	0.291555	1.19986
250	E10	L-011864-00	J-011864-05	FRG1	2483	NM_004477	73695875	10.5855	0.85243	11.4379	92.5473	11.6174	0.602818	12.2202	95.067	2.86192	0.166156	3.02808	94.5128	92.5473	95.067	94.5128	94.5128	1.32409	0.799926	0.743231
251	E11	L-003235-00	J-003235-14	CDK10	8558	NM_052987	32528264	5.36058	0.931728	6.29231	85.1926	11.6145	1.0309	12.6454	91.8476	0.589836	0	0.589836	100	85.1926	91.8476	100	91.8476	7.41631	0.653389	-0.317101
252	E12	L-012678-02	J-012678-17	DXS9928E	9130	NM_004699	4758219	16.8027	1.70263	18.5053	90.7992	6.54906	0.316149	6.86521	95.3949	2.02988	0.32834	2.35822	86.0768	90.7992	95.3949	86.0768	90.7992	4.6592	0.23905	-0.734206
253	F01	L-003497-00	J-003497-07	HDAC4	9759	NM_006037	13259519	0.429972	0	0.429972	100	4.81182	0.298955	5.11077	94.1505	10.174	0.628538	10.8025	94.1816	100	94.1505	94.1816	94.1816	3.36828	0.244905	0.611436
254	F02	L-003499-00	J-003499-05	HDAC6	10013	NM_006044	13128863	6.13418	0.329394	6.46357	94.9038	7.49092	0.454054	7.94497	94.285	4.73355	0.234865	4.96842	95.2729	94.9038	94.285	95.2729	94.9038	0.499155	0.532058	0.898791
255	F03	L-019978-02	J-019978-17	D6S2654E	26240	NM_012135	6912325	13.9906	0.92123	14.9118	93.8222	0.645901	0	0.645901	100	2.106	0	2.106	100	93.8222	100	100	100	3.56678	0.0563929	2.92627
256	F04	L-020251-02	J-020251-17	FAM32A	26017	NM_014077	142377168	9.94071	0.811544	10.7523	92.4523	4.44275	0.164959	4.60771	96.4199	1.85403	0.14866	2.00269	92.577	92.4523	96.4199	92.577	92.577	2.25558	0.885565	-0.026933
257	F05	L-004742-01	J-004742-09	KIAA0073	23398	NM_015342	24308048	10.5254	0.980503	11.5059	91.4782	9.13887	0.240192	9.37906	97.4391	1.89934	0	1.89934	100	91.4782	97.4391	100	97.4391	4.37246	0.227059	1.90741
258	F06	L-009868-01	J-009868-09	PPIL3	53938	NM_130906	19557635	10.3507	0.58352	10.9342	94.6634	4.59604	0.471206	5.06725	90.7009	4.75235	0.143162	4.89551	97.0756	94.6634	90.7009	97.0756	94.6634	3.2186	0.770886	0.803119
259	F07	L-009466-01	J-009466-09	PPIE	10450	NM_203456	45439315	13.353	1.14019	14.4932	92.1329	8.81816	0.972276	9.79044	90.0691	0.127205	0	0.127205	100	92.1329	90.0691	100	92.1329	5.24043	0.81199	-0.203606
260	F08	L-008256-00	J-008256-05	PPIL1	51645	NM_016059	22035675	5.75563	0.579954	6.33558	90.8461	3.33089	0.151147	3.48203	95.6592	0.465577	0	0.465577	100	90.8461	95.6592	100	95.6592	4.57899	0.388333	1.19932
261	F09	L-020024-01	J-020024-09	SDCCAG10	10283	NM_005869	64276485	13.643	1.00745	14.6504	93.1234	5.03208	0.543156	5.57523	90.2577	0.643804	0	0.643804	100	93.1234	90.2577	100	93.1234	5.00687	0.682975	0.190458
262	F10	L-007205-00	J-007205-05	PPIL2	23759	NM_014337	22547209	16.0794	1.27933	17.3587	92.63	13.3303	0.676998	14.0073	95.1668	2.75231	0.224648	2.97696	92.4538	92.63	95.1668	92.4538	92.63	1.51806	0.965196	-0.00583192
263	F11	L-008293-00	J-008293-06	PPIG	9360	NM_004792	42560243	13.6486	1.08853	14.7371	92.6137	7.15127	0.484394	7.63566	93.6562	0	0	0		92.6137	93.6562		93.1349	0.737129	0.884179	0.195044
264	F12	L-008307-00	J-008307-05	ASCL1	429	NM_004316	55743093	2.36342	0.265692	2.62911	89.8942	3.0991	0.191066	3.29017	94.1928	1.01032	0.0535098	1.06383	94.9701	89.8942	94.1928	94.9701	94.1928	2.73392	0.820678	0.61591
265	G01	L-014635-02	J-014635-19	TET1	80312	NM_030625	156139121	5.49107	0.500176	5.99124	91.6515	1.65826	0.130078	1.78834	92.7263	0.680519	0.114546	0.795065	85.5929	91.6515	92.7263	85.5929	91.6515	3.84596	0.126319	-0.395113
266	G02	L-003496-00	J-003496-09	HDAC3	8841	NM_003883	13128861	9.22439	0.702821	9.92721	92.9203	13.6686	1.03789	14.7064	92.9426	4.75261	0.348208	5.10082	93.1735	92.9203	92.9426	93.1735	92.9426	0.14019	0.811895	0.118538
267	G03	L-009604-00	J-009604-07	SUV39H1	6839	NM_003173	4507320	12.8727	1.32827	14.201	90.6466	9.23928	1.00627	10.2456	90.1785	2.09292	0.131403	2.22432	94.0925	90.6466	90.1785	94.0925	90.6466	2.13745	0.385151	-0.794906
268	G04	L-022793-01	J-022793-09	SETD1A	9739	NM_014712	55741676	12.797	0.936618	13.7336	93.1801	2.996	0.198589	3.19459	93.7836	2.98432	0.111659	3.09598	96.3934	93.1801	93.7836	96.3934	93.7836	1.70787	0.656357	0.453108
269	G05	L-006937-00	J-006937-05	EHMT2	10919	NM_025256	18426878	12.6728	1.12132	13.7941	91.8711	1.46018	0.078745	1.53893	94.8831	0.95394	0	0.95394	100	91.8711	94.8831	100	94.8831	4.10963	0.361479	0.890552
270	G06	L-012448-00	J-012448-05	SETD2	29072	NM_014159	30410778	20.0289	1.68028	21.7092	92.2601	4.28164	0.544298	4.82594	88.7214	1.44028	0	1.44028	100	92.2601	88.7214	100	92.2601	5.76824	0.949585	-0.153021
271	G07	L-013094-00	J-013094-07	MECP2	4204	NM_004992	7710148	7.53506	0.309807	7.84486	96.0508	5.92527	0.54962	6.47489	91.5115	0.919803	0.0923113	1.01211	90.8794	96.0508	91.5115	90.8794	91.5115	2.82102	0.748461	-0.450821
272	G08	L-011555-00	J-011555-05	MBD2	8932	NM_015832	48255922	16.2825	1.37519	17.6577	92.212	2.68683	0.166399	2.85323	94.168	0.859876	0.108817	0.968694	88.7666	92.212	94.168	88.7666	92.212	2.73474	0.410594	-0.172152
273	G09	L-020080-00	J-020080-05	NAB2	4665	NM_005967	42734426	13.259	1.59202	14.851	89.28	7.90037	0.45416	8.35453	94.5639	0.537984	0	0.537984	100	89.28	94.5639	100	94.5639	5.36017	0.640012	0.763551
274	G10	L-005230-01	J-005230-09	BMI1	648	NM_005180	39725706	21.6269	1.02097	22.6479	95.492	18.1017	1.06301	19.1648	94.4533	2.0671	0.122913	2.19002	94.3876	95.492	94.4533	94.3876	94.4533	0.619531	0.545694	0.719558
275	G11	L-017581-00	J-017581-06	EED	8726	NM_003797	24041019	11.4911	0.931873	12.423	92.4988	8.78386	0.810678	9.59453	91.5506	1.5679	0.27599	1.84389	85.0322	92.4988	91.5506	85.0322	91.5506	4.06487	0.101471	-0.435262
276	G12	L-011850-00	J-011850-05	PHC1	1911	NM_004426	62953126	9.10786	0.513261	9.62112	94.6653	0.677319	0.0649343	0.742254	91.2517	1.34227	0.156193	1.49846	89.5764	94.6653	91.2517	89.5764	91.2517	2.59343	0.439371	-0.554177
277	H01	L-009223-00	J-009223-05	AOF2	23028	NM_015013	58761545	12.5952	1.01426	13.6095	92.5474	7.47394	0.626506	8.10044	92.2658	8.49698	0.804863	9.30185	91.3473	92.5474	92.2658	91.3473	92.2658	0.627593	0.488917	-0.150746
278	H02	L-004290-00	J-004290-08	JMJD2B	23030	NM_015015	45504379	11.7598	1.10513	12.865	91.4098	2.66659	0.141975	2.80856	94.9449	3.01667	0.210384	3.22705	93.4806	91.4098	94.9449	93.4806	93.4806	1.77622	0.913337	0.332575
279	H03	L-021410-00	J-021410-05	PHC2	1912	NM_004427	37595529	3.71377	0.400302	4.11408	90.2699	0.893986	0	0.893986	100	0.7741	0	0.7741	100	90.2699	100	100	100	5.61765	0.183232	2.92627
280	H04	L-004218-00	J-004218-06	EZH2	2146	NM_152998	23510383	14.7746	0.894711	15.6693	94.29	6.17669	0.67139	6.84808	90.1959	2.65972	0.22673	2.88645	92.145	94.29	90.1959	92.145	92.145	2.04783	0.543612	-0.198782
281	H05	L-010431-00	J-010431-05	SMARCA4	6597	NM_003072	21071055	5.12888	0.54298	5.67186	90.4268	0.402578	0	0.402578	100	0.748371	0	0.748371	100	90.4268	100	100	100	5.52711	0.175062	2.92627
282	H06	L-017253-00	J-017253-05	SMARCA2	6595	NM_139045	48255897	15.6975	1.28666	16.9842	92.4244	8.0612	0.421599	8.4828	95.03	2.6885	0.199793	2.8883	93.0827	92.4244	95.03	93.0827	93.0827	1.35489	0.998698	0.174252
283	H07	L-005055-00	J-005055-05	KAT2B	8850	NM_003884	40805842	11.2296	1.03438	12.264	91.5657	1.58791	0.154981	1.74289	91.1078	1.03381	0	1.03381	100	91.5657	91.1078	100	91.5657	5.00696	0.758491	-0.429275
284	H08	L-004605-00	J-004605-06	DNMT1	1786	NM_001379	4503350	11.613	1.68538	13.2984	87.3264	2.42228	0	2.42228	100	1.95484	0.303835	2.25868	86.5481	87.3264	100	86.5481	87.3264	7.55181	0.397833	-2.11583
285	H09	L-004639-00	J-004639-05	EIF2C2	27161	NM_012154	29171733	8.74845	0.899352	9.6478	90.6782	4.57958	0.332781	4.91236	93.2256	0.508334	0.0664828	0.574816	88.4341	90.6782	93.2256	88.4341	90.6782	2.39738	0.212275	-0.782367
286	H10	L-010033-00	J-010033-05	CBX3	11335	NM_007276	20544152	25.2569	1.87598	27.1328	93.0859	14.1899	1.37443	15.5643	91.1694	4.31659	0.43785	4.75444	90.7907	93.0859	91.1694	90.7907	91.1694	1.23049	0.389258	-0.586951
287	H11	L-004665-00	J-004665-07	RPS6KA5	9252	NM_182398	32528296	8.40497	0.625899	9.03087	93.0693	1.13335	0	1.13335	100	1.8232	0.080035	1.90323	95.7948	93.0693	100	95.7948	95.7948	3.49156	0.216967	1.25325
288	H12	L-019831-00	J-019831-05	ASH2L	9070	NM_004674	4757789	12.5434	1.25125	13.7947	90.9295	0.876615	0	0.876615	100	0.135268	0	0.135268	100	90.9295	100	100	100	5.23688	0.150603	2.92627
