# Supplementary material
Source: HighWire-hosted journal article supplement (doi:10.1101/rna.049890.115)
Supplement: TableS3.xlsx [file TableS3.xlsx]

## Sheet: raw data
							low risk (HMVEC)	low risk (HMVEC)	low risk (HeLa #1)	low risk (HeLa #1)	low risk (HeLa #2)	low risk (HeLa #2)	low risk (HeLa com)	low risk (HeLa com)	high risk (HMVEC)	high risk (HMVEC)	high risk (HeLa #1)	high risk (HeLa #1)	high risk (HeLa #2)	high risk (HeLa #2)	high risk (HeLa com)	high risk (HeLa com)	low risk (HMVEC)				low risk (HMVEC)				low risk (HeLa #1)				low risk (HeLa #1)				low risk (HeLa #2)				low risk (HeLa #2)				low risk (HeLa com)
Accession	Description	ΣCoverage	Σ# Proteins	Σ# Unique Peptides	Σ# Peptides	Σ# PSMs	A4: Area	B4: Area	C4: Area	D4: Area	E4: Area	F4: Area	G2: Area	H2: Area	I4: Area	J4: Area	K4: Area	L4: Area	M4: Area	N4: Area	O2: Area	P2: Area	Score A2	Coverage A2	# Peptides A2	# PSM A2	Score B2	Coverage B2	# Peptides B2	# PSM B2	Score C2	Coverage C2	# Peptides C2	# PSM C2	Score D2	Coverage D2	# Peptides D2	# PSM D2	Score E2	Coverage E2	# Peptides E2	# PSM E2	Score F2	Coverage F2	# Peptides F2	# PSM F2	Score G4	Coverage G4	# Peptides G4
257472075	Chain A, Ribonuclease A With Asn 67 Replaced By A Beta-Aspartyl Residue	100	1	4	19	350	0	0	0	0	0	0	3.07319e+08	2.91747e+08	0	0	0	0	0	0	2.31893e+09	2.55196e+09																									1203.66	75.81	8
157837075	Chain A, Comparison Of Two Independently Refined Models Of Ribonuclease-A	100	6	4	20	341	0	0	0	0	0	0	3.04853e+08	2.91194e+08	0	0	0	0	0	0	2.31893e+09	2.55196e+09																									1091.15	75.81	8
309320653	Chain b, Semi-Synthetic Ribonuclease S: Para-Cyano-Phenylalanine At Position 8	100	3	2	4	20	0	0	0	0	0	0	8.83368e+07	6.60064e+07	0	0	0	0	0	0	1.2553e+08	1.50291e+08																										0
IPI00465365.4;4504445	Isoform A1-A of Heterogeneous nuclear ribonucleoprotein A1	95.63	3	2	48	499	1.64785e+08	1.22413e+08	1.07519e+09	8.99652e+08	6.88329e+08	3.1408e+08	1.32819e+09	1.04313e+09	1.07197e+09	1.35955e+09	1.75118e+09	1.4875e+09	9.61558e+08	4.27832e+08	4.64073e+09	4.97307e+09	491.074	38.13	15	22	528.301	41.25	16	24	1569.07	78.44	37	77		0			1508.98	78.44	36	72	1044	78.13	34	54		0
IPI00790633.1	25 kDa protein	94.95	19	10	10	58	0	0	3.5472e+07	3.05021e+07	0	2.37404e+06	0	0	0	0	2.31868e+07	2.60159e+07	2.78516e+06	0	0	0									364.494	94.95	10	20	254.005	94.95	9	17						0
IPI00419585.9;10863927	Peptidyl-prolyl cis-trans isomerase A	87.27	45	16	16	99	0	0	6.72962e+07	6.39772e+07	6.65595e+06	4.28902e+06	6.22777e+07	5.67752e+07	0	0	2.42903e+07	2.17703e+07	5.64287e+06	2.73806e+06	3.94336e+07	4.58677e+07									293.45	74.55	13	19	269.344	58.18	13	17	111.813	27.88	4	4		0			245.841	39.39	8
IPI00221222.7;197098442	Activated RNA polymerase II transcriptional coactivator p15	86.61	13	29	29	349	3.69755e+07	4.48451e+07	1.00906e+07	9.8572e+06	8.63619e+07	4.87059e+07	3.25195e+06	3.01854e+06	1.34529e+08	1.28012e+08	7.31878e+06	9.64357e+06	1.05734e+08	5.75296e+07	1.12237e+07	9.79235e+06	643.755	62.99	17	26	666.46	56.69	18	28	194.928	51.97	8	10	154.005	40.94	7	9	858.033	85.04	20	29	627.7	77.95	17	27		0
IPI00179700.3;22208967	Isoform HMG-I of High mobility group protein HMG-I/HMG-Y	85.05	6	5	20	286	1.66522e+07	2.11893e+07	3.84479e+07	3.41578e+07	3.84469e+07	2.2904e+07	2.55517e+07	3.6365e+07	5.43056e+07	5.76202e+07	6.04746e+06	9.10251e+06	1.17394e+07	3.68588e+06	0	6.09442e+06	245.529	62.62	7	10	235.367	62.62	5	9	205.734	57.01	3	8	130.648	57.01	3	5	232.127	57.01	3	8	145.588	57.01	3	6	159.894	57.01	3
133212	RecName: Full=Ribonuclease pancreatic; AltName: Full=RNase 1; AltName: Full=RNase A	84.68	1	3	9	49	0	0	0	0	0	0	2.19748e+07	2.33167e+07	0	0	0	0	0	0	7.24351e+08	7.166e+08																										0
157830431	Chain A, Crevice-Forming Mutants Of Bpti: Crystal Structures Of F22a, Y23a, N43g, And F45a	84.48	10	6	7	97	0	0	0	0	0	0	9.42861e+07	9.69752e+07	0	0	0	0	0	0	3.33799e+08	2.97056e+08																									246.207	75.86	4
IPI00396378.3;14043072	Isoform B1 of Heterogeneous nuclear ribonucleoproteins A2/B1	83.29	6	48	52	1209	3.4989e+08	3.61676e+08	2.56465e+08	1.38298e+08	3.7078e+08	1.97154e+08	2.52631e+08	2.12182e+08	1.50282e+09	1.32284e+09	2.79238e+08	2.90186e+08	1.03614e+09	4.04961e+08	1.50542e+09	1.46585e+09	576.653	39.66	18	37	655.776	37.39	19	35	1356.48	62.89	33	63	1178.28	70.25	33	57	1863.59	64.87	33	77	1258.87	63.74	34	67	944.927	41.08	10
109157425	Chain B, Crystal Structure Of Sumo-3-Modified Thymine-Dna Glycosylase	82.8	97	7	7	25	0	0	0	0	0	0	5.20475e+07	3.03792e+07	0	0	0	0	0	0	4.55293e+07	4.28671e+07																										0
IPI00045498.4;15010818	Isoform 3 of Heterogeneous nuclear ribonucleoprotein D-like	82.38	6	34	51	884	6.70419e+06	8.38721e+06	4.23362e+08	4.23009e+08	2.89605e+08	1.56872e+08	1.83039e+08	1.63764e+08	1.54941e+08	1.45682e+08	7.76178e+08	8.65289e+08	4.07128e+08	2.21454e+08	1.68521e+09	1.62315e+09		0			102.868	18.85	5	6	1524.08	63.93	32	68	1338.75	61.89	33	69	1227.64	66.8	29	58	644.471	57.38	21	37	944.955	45.08	13
IPI00219147.4;224586884	Isoform 2 of DNA-binding protein A	82.18	5	9	20	157	5.57213e+06	5.48641e+06	3.48851e+06	2.96471e+06	5.77626e+07	3.34351e+07	0	291644	5.7985e+07	5.65956e+07	8.07087e+06	7.06238e+06	9.42644e+07	5.04831e+07	6.81196e+06	3.51895e+06		0				0			114.604	28.71	4	4		0			472.973	76.57	14	18	350.413	49.5	10	14		0
IPI00017448.1;4506699	40S ribosomal protein S21	79.52	25	8	8	53	0	0	1.21274e+06	995808	2.38976e+06	1.89164e+06	3.47725e+06	3.30722e+06	0	0	2.4485e+06	1.43661e+06	2.56913e+06	1.3853e+06	9.68788e+06	9.94241e+06									85.485	32.53	3	3	111.889	32.53	3	4	96.2373	43.37	3	4		0			163.786	45.78	5
IPI00479786.5;154355000	KH-type splicing regulatory protein	79.32	6	59	67	1343	3.3128e+07	3.92777e+07	2.90931e+08	2.83754e+08	3.03788e+08	1.69733e+08	3.16162e+08	3.05389e+08	3.71634e+08	2.96833e+08	4.80619e+08	4.21319e+08	3.54299e+08	1.79669e+08	1.62356e+09	1.60392e+09	289.89	25.6	14	15	322.939	29.54	15	18	1926.99	62.73	42	80	1432.67	54.43	38	70	2028.27	60.48	39	72	1563.59	53.59	38	65	1409.6	42.48	27
IPI00031812.3;27807361	Nuclease-sensitive element-binding protein 1	79.32	51	14	25	204	1.75298e+07	1.88054e+07	2.69637e+06	3.57103e+06	1.73007e+08	5.73633e+07	102880	0	9.35657e+07	8.83709e+07	1.2545e+07	1.02644e+07	1.43612e+08	6.59969e+07	9.40074e+06	2.24903e+06	168.674	23.46	4	6	280.332	33.33	7	10	163.773	17.28	3	3		0			582.755	56.17	13	19	415.646	60.8	12	16		0
IPI00177716.7	Isoform HMG-Y of High mobility group protein HMG-I/HMG-Y	79.17	1	3	18	207	1.91895e+07	1.41046e+07	1.34638e+07	1.14327e+07	1.90639e+07	9.29354e+06	4.25819e+06	1.09053e+07	2.85763e+07	3.72348e+07	4.79815e+06	9.10251e+06	6.19387e+06	3.68588e+06	0	6.09442e+06		0				0				0				0				0				0				0
IPI00215965.2	Isoform A1-B of Heterogeneous nuclear ribonucleoprotein A1	78.49	2	3	51	852	1.64785e+08	1.22413e+08	1.07519e+09	8.99652e+08	6.88329e+08	3.1408e+08	0	0	1.07197e+09	1.35955e+09	1.75118e+09	1.4875e+09	9.61558e+08	4.27832e+08	0	0	491.074	32.8	15	22	528.301	35.48	16	24	1569.07	67.47	37	77	1395.21	75.27	35	69	1508.98	67.47	36	72	1044	67.2	34	54
IPI00927677.1;123123581	34 kDa protein	78.3	21	37	51	571	1.24247e+07	3.25174e+07	7.94572e+07	2.99829e+07	1.26178e+08	7.03879e+07	4.02323e+06	3.70964e+06	2.23292e+08	2.64162e+08	7.1586e+07	9.18793e+07	3.85703e+08	8.51673e+07	3.79837e+08	8.62296e+07	281.458	24.21	7	8	298.215	32.08	10	11	408.712	43.71	18	27	386.968	46.86	20	24	881.613	57.55	29	52	739.762	60.06	31	45		0
IPI00005996.1	High mobility group protein HMGI-C	77.98	1	10	10	46	0	0	0	0	0	0	0	0	0	0	0	0	0	0	0	0
IPI00291608.4;9966827	Isoform 1 of PEST proteolytic signal-containing nuclear protein	76.97	28	15	15	78	0	0	8.75822e+06	8.22055e+06	0	680499	7.08799e+06	4.91311e+06	0	0	1.13211e+07	8.23126e+06	0	0	1.51778e+07	1.29019e+07									266.401	53.37	9	12	153.05	60.11	10	11						0			152.263	34.83	7
IPI00411329.4	Putative uncharacterized protein HNRNPA1P4 (Fragment)	76.38	1	4	26	74	2.42497e+07	4.2391e+07	1.46583e+08	1.60375e+08	1.35232e+08	5.97088e+07	0	0	1.64803e+08	1.59289e+08	3.9219e+08	2.15695e+08	3.28809e+08	7.66157e+07	0	0		0				0				0				0				0				0
IPI00375441.2;17402900	Isoform 1 of Far upstream element-binding protein 1	75.62	2	6	68	986	1.66298e+07	1.88827e+07	2.61918e+08	2.61747e+08	2.87068e+08	1.55523e+08	3.04643e+08	2.99913e+08	2.56456e+08	2.43095e+08	5.54022e+08	7.00504e+08	5.00292e+08	2.4927e+08	1.56061e+09	1.54218e+09	317.642	28.57	16	19	338.587	32.14	18	22	1598.27	62.58	40	81	1290.22	62.73	35	69	1955.33	66.93	43	76	1382.79	60.71	37	68		0
IPI00180954.4;4502847	Cold-inducible RNA-binding protein	75	6	17	17	182	1.93774e+06	1.43003e+06	6.4666e+07	5.93093e+07	1.19879e+07	6.78696e+06	4.17341e+06	3.56441e+06	2.90295e+07	2.70792e+07	7.8432e+07	7.75834e+07	2.4522e+07	1.15169e+07	4.80119e+07	4.72683e+07		0				0			244.492	41.86	7	11	260.237	36.63	7	11	165.883	28.49	5	8	119.002	20.35	4	6	102.396	23.84	3
194382840	unnamed protein product [Homo sapiens]	72.34	2	5	54	469	0	0	0	0	0	0	3.04643e+08	2.99913e+08	0	0	0	0	0	0	1.56061e+09	1.54218e+09																									1498.58	54.05	27
IPI00217477.5	High mobility group protein B3	72	4	16	16	55	1.39793e+06	4.70744e+06	9.2217e+06	5.23308e+06	1.97433e+07	7.73953e+06	2.73359e+06	2.94886e+06	1.88436e+07	1.63115e+07	3.47012e+06	2.11985e+06	6.44158e+06	3.24651e+06	0	0		0				0			215.074	53.5	8	8	39.2464	20.5	3	3	295.538	46	10	13	130.051	39	6	8		0
IPI00024320.1;5803137	Putative RNA-binding protein 3	70.7	3	9	9	206	1.33126e+07	7.78601e+06	1.60728e+08	1.41651e+08	5.31791e+07	1.51683e+07	1.2105e+07	5.89877e+06	3.20262e+07	3.24775e+07	2.79252e+08	2.31139e+08	1.14121e+08	2.81512e+07	9.2819e+08	8.93835e+08		0				0			420.013	42.68	7	18	354.886	42.68	7	18	292.218	22.29	3	12	165.543	28.66	4	8	101.166	28.03	3
14043070	heterogeneous nuclear ribonucleoprotein A1 isoform b [Homo sapiens]	69.89	3	6	34	183	0	0	0	0	0	0	1.32819e+09	1.04313e+09	0	0	0	0	0	0	4.64073e+09	4.97307e+09																									713.173	39.78	14
IPI00220684.1;14110414	Isoform 3 of Heterogeneous nuclear ribonucleoprotein D0	68.3	31	6	48	670	3.21515e+07	4.25659e+07	5.32141e+08	4.71762e+08	7.65397e+08	3.66525e+08	1.10361e+08	1.08012e+08	5.05966e+08	4.7678e+08	9.76676e+08	1.123e+09	1.19864e+09	5.00629e+08	4.41607e+08	3.92489e+08	181.398	31.05	12	14	268.808	27.78	12	14	1052.54	62.09	33	54	935.006	62.09	34	52	1158.31	65.03	32	61	878.237	61.76	29	51	280.792	26.8	7
IPI00334713.1;55956921	Isoform 3 of Heterogeneous nuclear ribonucleoprotein A/B	68.07	17	46	48	752	1.91814e+07	2.0124e+07	2.45438e+08	2.50486e+08	1.72805e+08	1.00735e+08	4.94974e+07	5.31493e+07	1.51387e+08	1.60623e+08	6.73867e+08	7.76402e+08	3.2611e+08	1.77001e+08	2.61107e+08	2.17283e+08	168.582	15.44	7	9	189.886	20	6	6	1169.46	52.98	30	66	836.634	52.98	29	53	957.946	51.93	24	49	679.852	52.28	24	42	347.622	26.32	8
IPI00853059.2	Isoform 2 of Far upstream element-binding protein 1	68.04	1	1	55	711	1.66298e+07	1.88827e+07	2.66434e+08	2.562e+08	2.93026e+08	1.62516e+08	0	0	2.77976e+08	2.56335e+08	5.36885e+08	6.96985e+08	5.00292e+08	2.49375e+08	0	0		0				0			1559.44	57.8	40	77	1276.69	57.95	35	68	1939.77	62.08	43	76	1323.47	55.96	38	65
IPI00419258.4	High mobility group protein B1	67.91	3	20	28	295	5.94289e+06	4.47128e+06	3.48654e+07	3.26362e+07	1.30183e+08	8.01287e+07	1.63478e+06	0	3.96565e+07	3.70227e+07	1.09458e+07	1.06383e+07	7.71108e+07	2.22922e+07	1.94506e+06	1.05682e+07	97.6721	20.93	4	5	112.346	25.12	6	9	447.073	57.67	16	27	459.604	53.49	17	25	919.563	64.19	22	39	786.91	64.19	25	45		0
10121038	Chain A, Crystal Structure Of The Ala4aib Mutation In Rnase S	66.67	1	1	3	6	0	0	0	0	0	0	8.83368e+07	6.60064e+07	0	0	0	0	0	0	1.87866e+08	2.2504e+08																										0
433344;IPI00903278.1	p37 AUF1 [Homo sapiens]	66.43	33	4	46	144	3.17687e+07	4.25659e+07	5.32141e+08	4.71762e+08	7.65397e+08	3.66525e+08	1.10361e+08	1.08012e+08	5.05966e+08	4.7678e+08	9.76676e+08	1.123e+09	1.19864e+09	5.00629e+08	4.41607e+08	3.92489e+08		0				0				0				0				0				0			280.792	28.67	7
15680098	Unknown (protein for IMAGE:4045143) [Homo sapiens]	64.38	26	4	4	10	0	0	0	0	0	0	1.56285e+06	1.69181e+06	0	0	0	0	0	0	3.52832e+06	2.23611e+06																										0
IPI00843996.1;224084730	Splicing factor, arginine/serine-rich 3, isoform CRA_a	63.71	14	9	9	62	1.25691e+07	1.23965e+07	5.52608e+06	5.90958e+06	4.07069e+07	2.28245e+07	0	0	2.65238e+07	3.83532e+07	7.41342e+06	8.51001e+06	2.6945e+07	1.31555e+07	3.06356e+07	3.50838e+07		0				0			45.3789	24.19	3	4	41.1708	24.19	3	3	261.865	63.71	8	15	159.807	40.32	5	12
IPI00790634.2;219803946	Isoform 2 of Partner of Y14 and mago	63.55	5	2	14	116	2.47451e+06	2.98879e+06	3.88829e+06	2.68259e+06	4.6803e+06	1.93161e+06	2.37465e+06	2.27491e+06	1.5896e+07	2.59264e+07	2.75183e+06	2.87671e+06	3.94786e+06	1.41104e+06	676440	5.81718e+06	176.453	28.57	5	5	204.034	28.57	6	7	181.374	35.96	6	6	100.875	33.99	4	4	153.322	21.67	3	4	155.547	21.67	3	4	179.816	30.05	4
IPI00293434.2;149999611	Signal recognition particle 14 kDa protein	63.24	1	11	11	61	1.08792e+07	1.12945e+07	1.39064e+07	7.17755e+06	2.97258e+07	5.86829e+06	5.32761e+06	8.75331e+06	1.21005e+07	3.93247e+07	1.40384e+07	5.18249e+06	1.79989e+07	8.72836e+06	5.148e+06	4.94849e+06	69.0679	37.5	3	4	52.8105	40.44	4	5		0				0			104.389	44.12	3	5		0				0
133197	RecName: Full=Ribonuclease pancreatic; AltName: Full=RNase 1; AltName: Full=RNase A	61.29	2	2	7	25	0	0	0	0	0	0	4.84875e+07	2.8129e+07	0	0	0	0	0	0	4.31074e+08	4.4965e+08																										0
IPI00876879.1	cAMP responsive element modulator isoform g	61.11	1	3	4	4	0	0	0	0	4.45533e+06	0	0	0	518251	506221	3.2663e+06	0	1.99739e+06	0	0	0																	82.8144	61.11	4	4
IPI00646304.4	Peptidyl-prolyl cis-trans isomerase B	60.19	2	13	13	67	0	1.26637e+06	6.74048e+06	8.43174e+06	6.36002e+06	3.99213e+06	5.58828e+06	5.29321e+06	7.0336e+06	9.56901e+06	5.3767e+06	6.25644e+06	8.43403e+06	3.59584e+06	0	0						0			202.66	41.67	7	7	202.922	47.22	8	9	45.8785	22.22	4	4	123.669	31.48	6	6		0
IPI00217950.5	Non-histone chromosomal protein HMG-17	60	1	3	4	6	6.17245e+07	2.57249e+08	1.28986e+08	6.1275e+07	2.05084e+07	9.93674e+06	9.87557e+07	0	1.29066e+08	7.24752e+07	2.44354e+07	2.76407e+07	1.98224e+07	0	1.56733e+07	17589182		0				0				0				0				0				0				0
IPI00220327.4;119395750	Keratin, type II cytoskeletal 1	59.32	5	39	43	457	1.45707e+07	6.0828e+06	4.29486e+07	3.67485e+07	1.46917e+08	8.43127e+07	3.90588e+07	2.7599e+07	2.40055e+08	2.31671e+08	1.00116e+08	9.36736e+07	1.03804e+08	4.53313e+07	6.84277e+07	6.5385e+07	188.563	13.82	9	9	242.06	12.58	8	8	452.628	20.03	14	18	458.552	19.1	15	16	824.1	30.12	22	29	611.027	23.91	19	23	491.219	21.27	12
IPI00442073.5	Cysteine and glycine-rich protein 1	58.55	1	9	9	25	0	0	1.82985e+07	1.74004e+07	3.20487e+06	1.14431e+07	1.39919e+07	1.28455e+07	0	0	7.9897e+06	1.3166e+07	2.25485e+06	1.11108e+06	1.89361e+07	1.96064e+07									254.87	48.19	7	9	168.17	44.56	6	7	174.279	26.42	3	5		0				0
IPI00012340.1	Splicing factor, arginine/serine-rich 9	58.37	1	14	15	72	0	0	1.2558e+06	0	3.25025e+06	2.06562e+06	0	0	5.08101e+06	4.68577e+06	7.07247e+06	7.95222e+06	9.65623e+06	3.80299e+06	0	0										0							97.7461	48.42	11	11	67.7412	22.62	5	6
IPI00305092.7;14150139	Isoform 1 of Partner of Y14 and mago	57.84	5	1	13	106	2.47451e+06	2.98879e+06	3.88829e+06	2.64661e+06	4.6803e+06	1.93161e+06	2.37465e+06	2.27491e+06	1.5896e+07	2.59264e+07	2.75183e+06	2.87671e+06	3.94786e+06	1.41104e+06	676440	1.38902e+06	176.453	28.43	5	5	204.034	28.43	6	7		0				0			153.322	21.57	3	4	155.547	21.57	3	4	179.816	29.9	4
IPI00430813.3;77735399	Isoform 2 of Cellular nucleic acid-binding protein	57.65	9	9	9	19	0	0	4.26043e+06	3.65473e+06	875967	0	345160	360678	0	0	3.75985e+06	1.87553e+06	1.1503e+06	0	0	0									77.421	30	4	4	93.7807	33.53	5	6		0								0
224049401	PREDICTED: heterogeneous nuclear ribonucleoprotein D isoform 2 [Taeniopygia guttata]	57.62	6	2	27	118	0	0	0	0	0	0	1.10361e+08	1.08012e+08	0	0	0	0	0	0	4.41607e+08	3.92489e+08																									280.792	30.48	7
IPI00719622.1	40S ribosomal protein S28	56.52	1	5	5	9	0	0	1.82902e+06	1.74792e+06	3.6379e+06	609821	0	0	4.51841e+06	4.8529e+06	3.79085e+06	3.59045e+06	2.75553e+06	667635	0	0										0				0				0				0
IPI00019359.4	Keratin, type I cytoskeletal 9	56.5	1	18	30	263	1.46133e+07	1.65984e+07	1.91195e+07	2.18436e+07	1.03646e+08	3.90345e+07	0	932120	7.81836e+07	7.56656e+07	4.97356e+07	6.7348e+07	4.29786e+07	1.5726e+07	7.57752e+06	7.36593e+06	103.758	8.67	5	5	102.514	6.42	3	3	292.389	28.25	10	14	231.048	23.43	11	15	625.493	38.04	18	28	471.585	29.86	12	19		0
IPI00014938.3;32129199	SAP domain-containing ribonucleoprotein	55.71	18	15	15	99	486059	0	2.07016e+07	1.93971e+07	4.83007e+06	1.83134e+06	6.03219e+06	6.49564e+06	2213747	2.2941e+06	1.94313e+07	1.83094e+07	4.00603e+06	1.38685e+06	1.48791e+07	1.67014e+07		0							207.228	38.57	9	11	198.887	38.1	8	10		0				0			144.64	26.19	5
IPI00219097.4	High mobility group protein B2	54.07	1	16	24	254	4.78194e+06	6783234	3.07339e+07	2.74206e+07	1.45252e+08	8.5406e+07	0	0	5.082e+07	4.6523e+07	9.03748e+06	5.08914e+06	7.89564e+07	2.71032e+07	1.94506e+06	1.10844e+07		0				0			282.614	26.32	8	13	300.38	41.63	13	18	950.594	54.07	22	40	690.491	46.89	21	41
IPI00607796.1;119606043	Putative uncharacterized protein HN1L	53.54	8	5	5	11	0	0	6.07414e+06	6.00126e+06	0	0	2.64978e+06	3.53713e+06	0	0	1.85004e+06	0	958306	0	0	0									117.583	35.43	3	3	77.001	41.73	4	4										0
IPI00894485.1	Putative uncharacterized protein SERF2	53.33	2	5	5	10	2.64531e+06	7.33636e+06	0	0	0	0	0	0	2456298	1.32014e+06	0	0	0	0	0	0	79.6279	48.89	3	4	89.3123	53.33	5	6
IPI00003865.1;5729877	Isoform 1 of Heat shock cognate 71 kDa protein	53.1	45	28	35	258	0	0	3.59621e+07	3.24459e+07	5.88851e+06	4.02493e+06	8.42853e+06	9.41093e+06	3.82108e+06	3.36603e+06	7.8449e+07	6.80793e+07	1.42894e+07	6.70058e+06	1.94614e+07	1.97223e+07									617.292	39.63	26	31	547.055	36.07	22	28	117.052	8.05	4	5	79.5659	5.57	3	3	193.391	13.47	5
IPI00643781.1;71052048	PSIP1 protein	52.89	42	14	22	199	2.22737e+07	2.60996e+07	8.8453e+06	5.79015e+06	4.20635e+07	1.97423e+07	991272	2.13837e+06	5.77086e+07	5.10044e+07	3.9822e+06	4.79571e+06	2.41627e+07	9.59505e+06	9.1427e+06	9.72976e+06	158.692	25.53	7	9	174.463	23.1	8	11	108.71	17.93	5	7	93.6437	18.24	6	6	393.276	27.96	14	20	278.412	36.17	14	17		0
IPI00169383.3;4505763	Phosphoglycerate kinase 1	52.52	11	19	19	78	0	0	2.10892e+07	1.91405e+07	2.46021e+06	816541	1.01795e+07	9.68118e+06	0	692234	5.93697e+06	6.60101e+06	2.60696e+06	1.22163e+06	6.40316e+06	6.43634e+06									459.627	37.65	12	18	383.117	47.48	15	19	106.645	10.31	3	3	58.2215	10.31	3	3	180.786	17.75	5
IPI00165230.1;25470886	Isoform 1 of DAZ-associated protein 1	50.61	7	25	25	411	3.35104e+07	5.89197e+07	5.01276e+08	4.39712e+08	1.67223e+08	8.48716e+07	1.67351e+08	2.33494e+08	2.70427e+08	1.93066e+08	6.58901e+08	6.06276e+08	2.59088e+08	1.23507e+08	4.82388e+08	9.87207e+08	167.664	10.07	6	9	177.372	12.53	6	10	699.631	40.29	18	30	455.886	39.56	17	26	488.749	33.66	11	19	322.984	19.16	8	13	349.265	15.97	6
IPI00009032.1;10835067	Lupus La protein	50.25	3	26	26	96	382162	0	4.03106e+06	3.58254e+06	1.00319e+06	0	0	5.04381e+06	5.19375e+06	5.86028e+06	2.62655e+07	2.29128e+07	6.00721e+06	2.16248e+06	2.52879e+07	2.41111e+07		0							136.907	6.37	3	3	102.399	7.84	4	4		0
IPI00021570.1	Isoform 1 of Endothelial differentiation-related factor 1	50	3	8	8	53	3.58232e+06	3.59808e+06	2.21607e+06	2.3738e+06	5.24018e+06	3.23893e+06	1.18763e+07	1.15481e+07	9.68312e+06	9.32372e+06	1.03023e+06	1.16068e+06	4.53399e+06	1.96857e+06	3.8244e+06	3.95578e+06	102.411	25	4	6	70.7871	15.54	3	4	80.028	25	3	3		0			113.567	41.22	6	6	137.165	43.24	6	7		0
114556250	PREDICTED: similar to proliferation associated gene (pag) isoform 1 [Pan troglodytes]	50	11	5	5	5	0	0	0	0	0	0	0	0	0	0	0	0	0	0	3.7652e+06	2.79043e+06
IPI00219018.7	Glyceraldehyde-3-phosphate dehydrogenase	48.96	3	14	15	120	0	416230	2.7158e+07	2.53244e+07	3.64826e+07	1.56627e+07	2.04435e+06	1.3268e+06	5.48836e+06	1.05835e+07	1.59763e+07	1.31689e+07	3.30831e+07	1.16322e+07	3.01558e+06	2.58212e+06						0			343.617	37.01	9	12	271.909	31.04	9	10	341.77	31.34	8	10	162.482	31.94	7	7		0
IPI00642816.2	Signal recognition particle 9 kDa protein	48.84	3	5	5	11	0	474513	1.14349e+07	1.14286e+07	1.41164e+07	6.36564e+06	7.45338e+06	3.5049e+06	5.27783e+06	7.37446e+06	1.09379e+07	1.23337e+07	8.27406e+06	5.72345e+06	1.93209e+07	1.93339e+07						0				0				0				0				0				0
IPI00014263.1	Isoform Long of Eukaryotic translation initiation factor 4H	48.39	1	15	15	104	1.29067e+07	1.18327e+07	9.82426e+06	1.11904e+07	2.03644e+07	1.13361e+07	6.4705e+06	5.49975e+06	5.26278e+07	4.30413e+07	8.70061e+06	7.59817e+06	2.99792e+07	1.85745e+07	1.59735e+07	1.68006e+07		0			55.7515	22.98	6	7	163.282	32.26	6	8	133.789	19.35	5	7	234.45	45.16	11	14	142.671	38.31	10	11		0
IPI00009865.3	Keratin, type I cytoskeletal 10	47.6	3	9	29	257	2.6607e+06	3.68968e+06	1.88038e+07	1.79734e+07	3.01642e+07	1.29893e+07	0	0	4.15886e+07	2.81516e+07	4.78406e+07	4.28567e+07	4.52471e+07	2.27491e+07	0	0	164.942	9.08	4	4	216.635	11.82	6	6	387.201	27.57	16	18	321.869	21.23	14	14	439.899	16.1	10	13	295.941	21.06	12	12
IPI00386120.3;295842307	Isoform 6 of Splicing factor 1	47.46	37	18	38	625	4.76254e+07	5.18248e+07	2.23438e+08	1.38102e+08	3.20272e+08	1.28986e+08	2.31399e+08	2.26758e+08	2.76718e+08	2.78567e+08	3.64437e+08	3.22641e+08	4.06013e+08	1.48179e+08	7.81827e+08	6.87956e+08	156.2	8.93	6	9	159.486	16.81	9	11	828.085	33.45	23	41	673.038	33.63	20	35	999.385	36.6	26	49	559.323	33.27	19	35	428.932	18.91	10
47132620	keratin, type II cytoskeletal 2 epidermal [Homo sapiens]	47.1	4	6	26	85	0	0	0	0	0	0	1.69719e+07	8.7796e+06	0	0	0	0	0	0	1.39312e+08	1.43001e+08																									258.402	18.47	11
IPI00021304.1;181402	Keratin, type II cytoskeletal 2 epidermal	46.98	4	10	31	269	7.50744e+06	8.75322e+06	1.72104e+07	1.67175e+07	3.21458e+07	1.77462e+07	1.69719e+07	8.7796e+06	63613989	5.98142e+07	5.86829e+07	6.42673e+07	3.39476e+07	1.60509e+07	1.39312e+08	1.43001e+08	104.81	11.63	5	5	205.778	13.8	6	6	446.566	24.96	14	16	386.908	23.41	12	13	322.923	21.86	12	12	288.373	14.73	7	9	258.402	18.29	11
IPI00006378.3	Coiled-coil domain-containing protein 72	46.88	1	5	5	28	4.79903e+06	4.62325e+06	4.97962e+06	3.58665e+06	9.18682e+06	5.50985e+06	0	2.18123e+06	2.20799e+07	1.431e+07	0	0	3.34271e+06	1.87216e+06	0	0		0			55.0605	40.63	3	5	97.7729	46.88	4	6	79.7244	40.63	4	5	105.055	40.63	4	5	112.185	40.63	3	4
IPI00386621.2	CALM3 protein	46.62	3	5	5	7	0	0	1.43872e+06	1.33802e+06	2.90958e+06	0	0	0	0	0	2.49125e+06	4.97131e+06	0	1.15739e+06	0	0									58.9596	24.32	3	3		0				0
IPI00377261.1;100816392	Isoform 1 of Far upstream element-binding protein 3	46.5	8	16	22	168	2.3305e+06	2.25447e+06	3.83021e+07	3.87297e+07	3.35237e+07	2.00986e+07	5.82877e+06	1.04613e+07	3.23259e+07	3.47079e+07	9.84831e+07	9.35187e+07	6.2425e+07	2.78969e+07	8.0867e+07	6.46067e+07		0				0				0				0				0			119.787	10.31	6	7	112.49	7.34	4
IPI00604620.3;55956788	Nucleolin	45.92	9	46	46	285	4.11491e+06	5.12624e+06	1.15563e+07	1.13248e+07	8.85787e+07	3.30089e+07	559607	367929	5.27834e+07	8.13565e+07	2.60775e+07	2.63819e+07	1.95248e+08	6.48318e+07	1.86943e+07	8.18298e+06	116.276	10.99	8	8	95.2576	14.65	11	12	220.448	11.41	9	10	199.282	10.42	9	11	488.145	15.77	13	20	357.617	13.66	13	18		0
IPI00027834.3;52632383	Heterogeneous nuclear ribonucleoprotein L	44.65	16	16	22	133	2.88042e+06	4.26483e+06	3.94604e+06	3.84706e+06	1.40573e+07	8.49955e+06	1.30639e+07	13230912	3.67869e+07	4.6653e+07	3.38838e+07	3.3544e+07	3.31539e+07	1.32438e+07	2.40868e+06	4.14592e+06	44.0739	3.4	3	3	85.2306	5.26	3	3	95.6602	9.34	4	4	110.915	14.09	6	6	200.678	20.88	8	11	137.296	13.24	7	9		0
IPI00215884.4;5902076	Isoform ASF-1 of Splicing factor, arginine/serine-rich 1	43.95	22	11	12	59	0	0	1.2393e+06	1.57323e+06	2.04703e+06	1.24348e+06	0	0	4.60818e+06	7.26122e+06	1.12356e+07	1.16522e+07	7.54483e+06	2.73662e+06	6.00912e+06	8.68347e+06										0			53.4488	14.52	3	3	71.8986	21.37	5	6		0
38327502	CArG binding factor [Homo sapiens]	43.62	1	3	18	22	0	0	0	0	0	0	1.70543e+08	1.52119e+08	0	0	0	0	0	0	1.68521e+09	1.61499e+09																										0
IPI00796848.1	cDNA FLJ52570, highly similar to Splicing factor, arginine/serine-rich 2	43.06	3	13	13	101	3.16331e+06	5.56609e+06	0	0	3.60977e+07	1.75123e+07	0	0	3.9033e+07	3.59216e+07	4.14907e+06	3.11303e+06	7.71595e+07	2.85765e+07	0	1.29431e+06	58.848	19.62	3	4		0											378.036	33.01	8	14	264.063	25.36	5	7
IPI00215911.3;18375501	DNA-(apurinic or apyrimidinic site) lyase	42.77	10	21	21	300	6.54619e+07	8.57574e+07	9.11993e+07	3.6323e+07	8.59344e+07	6.32817e+07	5.45454e+07	5.46575e+07	2.40367e+08	2.1831e+08	3.28643e+07	2.112e+07	6.24496e+07	2.92367e+07	3.0861e+07	2.55671e+07	187.608	18.55	7	10	322.667	19.18	11	15	407.854	41.51	15	21	291.066	41.51	15	19	368.587	31.13	12	16	247.722	26.73	9	13	219.468	11.64	4
114667513	PREDICTED: similar to keratin 10 isoform 2 [Pan troglodytes]	42.73	10	4	22	95	0	0	0	0	0	0	8.44175e+06	1.3664e+07	0	0	0	0	0	0	9.79489e+07	9.07403e+07																									485.032	26.03	13
IPI00465439.5;4557305	Fructose-bisphosphate aldolase A	42.58	33	15	15	105	0	1.60231e+06	1.85194e+07	1.95154e+07	6.77278e+06	3.34997e+06	3.2579e+06	3.10659e+06	5.25458e+06	4.41689e+06	5.34843e+06	6.65288e+06	8.14211e+06	4.17722e+06	5.83598e+06	6.34446e+06						0			289.006	26.92	9	10	221.841	32.14	11	11	212.159	18.68	7	7	139.443	23.9	8	8	153.44	12.09	4
IPI00217963.3	Keratin, type I cytoskeletal 16	42.07	1	9	18	61	3.02998e+06	2.42206e+06	7.17523e+06	4.80756e+06	6.43709e+06	4.21738e+06	4.91505e+06	3.56061e+06	1.85041e+07	1.73607e+07	1.77766e+07	1.58044e+07	2.17076e+07	9.72499e+06	2.31327e+07	7.20461e+06		0				0				0				0				0			208.107	15.43	7	7		0
IPI00031526.3;13128992	Uncharacterized protein C19orf43	42.05	3	13	13	36	0	0	5.21041e+06	5.33267e+06	1.0779e+07	5.68036e+06	1.3124e+06	1.08807e+06	1.30693e+07	1.09322e+07	7.73012e+06	5.42074e+06	5939576	3.46987e+06	9.26936e+06	4.92835e+06									113.39	23.86	4	5	121.563	38.07	6	7		0				0				0
IPI00020956.1;4758516	Hepatoma-derived growth factor	40.42	22	11	13	84	1.27007e+06	1.01792e+06	1.11589e+07	1.08875e+07	2.06257e+07	9.85509e+06	1.87147e+06	1.94096e+06	4.69647e+06	4.21288e+06	2.15526e+06	4.20835e+06	1.15718e+07	5.32252e+06	0	704333		0			65.1104	11.67	3	3	251.592	40.42	10	12	209.233	24.58	9	10	320.591	35.42	10	14	225.144	24.58	8	11	102.363	11.25	3
296218972	PREDICTED: U6 snRNA-associated Sm-like protein LSm3-like [Callithrix jacchus]	40.2	3	3	3	5	0	0	0	0	0	0	583864	0	0	0	0	0	0	0	9.27322e+06	8.89646e+06																										0
IPI00219365.3;4505257	Moesin	39.86	14	20	28	162	2.33154e+06	3.20573e+06	2.48208e+07	2.09792e+07	6.6235e+06	5.09415e+06	1.01554e+07	1.58841e+07	1.19008e+07	1.46217e+07	1.01323e+07	9.41182e+06	6.78635e+06	4.65722e+06	1.22379e+07	1.25526e+07	58.3557	4.33	3	4	86.8573	7.8	5	6	531.154	36.74	23	27	660.953	32.41	24	29	195.215	16.46	9	9	129.427	11.96	7	8		0
IPI00013881.6;5031753	Heterogeneous nuclear ribonucleoprotein H	39.64	15	17	17	138	0	0	970311	983151	6.9283e+06	3.2379e+06	1.52368e+06	1.64261e+06	0	0	7.24849e+06	5.42728e+06	3.29448e+06	1.02452e+06	1.33664e+07	1.43956e+07									84.9806	6.9	3	3		0			139.163	13.14	6	6	121.872	14.03	5	5		0
IPI00293665.9;119703753	Keratin, type II cytoskeletal 6B	39.36	8	4	26	115	3.32273e+06	3.76767e+06	6.28708e+06	1.46024e+07	1.84735e+07	1.13194e+07	9.10437e+06	7.80788e+06	2.77661e+07	2.58714e+07	3.27748e+07	3.32421e+07	2.09863e+07	4.94774e+06	2.59004e+07	7.00876e+06	107.356	9.57	5	5		0				0				0			297.836	24.11	13	13		0			181.167	12.41	6
IPI00554761.2;48255933	Non-histone chromosomal protein HMG-14	39	13	8	8	81	1.10134e+07	1.43396e+07	5.61544e+07	6.77409e+07	4.94755e+06	885960	6.61262e+07	2.63111e+07	1.11008e+07	1.02252e+07	3.72461e+07	2.06825e+07	0	0	3.51887e+06	4.7819e+07	92.2122	31	5	5	133.742	31	5	7	164.307	32	5	9	166.286	32	6	9		0				0				0
IPI00549248.4	Isoform 1 of Nucleophosmin	38.78	3	15	15	142	2.35986e+07	2.51189e+07	865208	0	9.04997e+07	4.97921e+07	0	0	9.06811e+07	8.86108e+07	0	0	3.10047e+07	1.42277e+07	0	0	151.761	16.67	8	10	159.734	18.71	7	10		0				0			438.266	18.71	11	25	329.579	18.71	11	19
IPI00014197.2	Isoform 1 of Protein CDV3 homolog	38.76	2	7	7	9	0	0	8.48223e+06	4.08467e+06	3.82446e+06	0	4357500	2.44373e+06	0	0	4.50533e+06	0	5.42306e+06	0	0	0									75.4098	38.76	6	6	66.4059	15.89	3	3		0								0
133210	RecName: Full=Ribonuclease pancreatic; AltName: Full=RNase 1; AltName: Full=RNase A	38.71	1	2	4	8	0	0	0	0	0	0	5.83887e+06	7.76329e+06	0	0	0	0	0	0	4.67437e+08	4.45079e+08																										0
194384578	unnamed protein product [Homo sapiens]	38.24	6	3	3	3	0	0	0	0	0	0	957326	0	0	0	0	0	0	0	0	0																										0
IPI00304596.3;34932414	Non-POU domain-containing octamer-binding protein	38.22	20	16	16	155	5.17856e+06	6.64384e+06	8.18087e+06	7.56136e+06	1.07642e+07	3.66201e+06	3.45984e+06	4.79864e+06	1.12724e+07	9.67983e+06	1.06661e+07	9.06432e+06	1.61177e+07	4.49685e+06	1.53357e+07	1.18027e+07		0				0			166.235	12.74	4	5	188.392	18.68	6	7	258.667	22.51	9	11	131.395	17.62	6	7	263.078	13.16	4
IPI00930205.1;228008293	synaptotagmin binding, cytoplasmic RNA interacting protein isoform 5	38.15	19	13	18	106	8.37667e+06	1.21184e+06	5.18233e+06	6.07785e+06	1.85535e+07	6.75706e+06	1.81545e+07	1.67423e+07	1.56864e+07	1.60376e+07	2.84342e+07	2.73637e+07	2.42694e+07	1.21623e+07	3.76567e+07	6.62445e+07		0				0			101.86	4.1	3	3	82.5257	4.1	3	3		0			77.3548	4.1	3	3		0
IPI00909059.3;194387918	cDNA FLJ53910, highly similar to Keratin, type II cytoskeletal 6A	38.13	9	4	23	78	2.36116e+06	1.83015e+06	6.5477e+06	6.06503e+06	9.57555e+06	5.38206e+06	3.51465e+06	3.18518e+06	1.60572e+07	1.36157e+07	1.63663e+07	1.6704e+07	9.43722e+06	4.94774e+06	2.59004e+07	7.00876e+06		0				0			165.179	12.52	7	7		0			299.551	22.62	11	11	217.431	16.64	8	9		0
IPI00029631.1	Enhancer of rudimentary homolog	37.5	1	4	4	8	0	0	4.9335e+06	9.01673e+06	0	3.72589e+06	0	0	0	0	5.15704e+06	6.74647e+06	1.8588e+07	5.54717e+06	0	0										0			47.3063	31.73	3	4						0
IPI00013297.1	28 kDa heat- and acid-stable phosphoprotein	36.46	1	12	12	36	0	291702	5.60276e+06	3.28883e+06	5.3646e+06	4.31197e+06	0	0	2.35599e+06	5.81848e+06	2.78709e+06	2.55186e+06	7.4719e+06	2.08522e+06	1.46361e+06	0						0			101.734	29.28	4	4	56.3012	16.02	3	3	156.935	32.04	10	10		0
IPI00940851.1;38201714	ELAV-like protein 1	36.2	19	11	11	47	0	0	0	1.40186e+06	4.17897e+06	2.8924e+06	5.22226e+06	5.539e+06	1.4346e+06	3.08136e+06	1.06028e+07	1.15318e+07	6.79601e+06	3.46819e+06	2.62518e+06	5.42618e+06														0				0				0				0
IPI00926376.1	TatD DNase domain containing 3 isoform 3	35.42	5	7	7	16	0	0	6.03176e+06	4.87201e+06	0	0	0	0	0	0	2.42963e+06	3.59353e+06	0	0	0	0									71.1346	27.5	6	7	56.4775	27.08	5	5
IPI00027798.1;13899289	Protein FAM103A1	34.75	1	5	5	32	0	0	3.06681e+06	3.56991e+06	1.92757e+06	739802	8.03885e+06	4.43095e+06	0	0	5.09062e+06	3.22491e+06	3.1698e+06	1.17974e+06	1.62979e+07	1.47187e+07									84.7839	21.19	3	4	54.379	33.9	3	3	98.1002	21.19	3	4		0				0
IPI00383296.5;157412270	Isoform 2 of Heterogeneous nuclear ribonucleoprotein M	34.73	38	6	20	83	0	0	1.36649e+06	1.32839e+06	1.3242e+06	0	3.80577e+06	3.76229e+06	0	0	7.49471e+06	6.80061e+06	2.10775e+06	624156	5.02109e+06	7.10615e+06									134.765	9.41	5	5	94.0811	6.08	3	3		0				0			111.34	7.81	4
IPI00009867.3;119395754	Keratin, type II cytoskeletal 5	34.58	4	16	24	133	3.17443e+06	4.30331e+06	4.00091e+06	4.76706e+06	1.60854e+07	7.4153e+06	6.47696e+06	6.33122e+06	2.31613e+07	2.37676e+07	1.1169e+07	1.09117e+07	1.17688e+07	3.92887e+06	3.85833e+07	1.96923e+07	73.2873	9.83	5	5	130.11	11.53	6	6		0				0			212.191	17.97	11	11	168.768	14.75	7	8		0
IPI00470497.3;66346681	Isoform 2 of Plasminogen activator inhibitor 1 RNA-binding protein	34.08	33	14	14	107	2.43141e+06	1.1579e+07	3.85188e+06	5.34273e+06	1.70041e+07	6.61101e+06	1.51695e+07	8.58107e+06	2.07444e+07	2.09201e+07	4.10982e+07	5.45535e+06	1.39735e+07	4.08823e+06	5.89248e+06	5.34381e+06	90.2834	9.2	3	3	89.0237	8.21	3	3	54.3442	8.96	3	4	71.3353	17.41	6	6	158.063	24.13	8	8	79.8558	17.16	6	6	197.178	13.18	4
IPI00883857.2	Isoform Long of Heterogeneous nuclear ribonucleoprotein U	34.06	5	32	32	117	204201	263661	8.90184e+06	8.35337e+06	2.42207e+06	0	0	0	1.32358e+06	2.6884e+06	3.75415e+07	3.74117e+07	2.16931e+06	1.61957e+06	9.08208e+06	9.45776e+06		0				0			251.429	19.52	12	15	217.946	13.45	8	10	66.1714	4.85	4	4		0
IPI00922811.1	cDNA FLJ54222, highly similar to Glycylpeptide N-tetradecanoyltransferase 1	33.58	2	3	3	3	638292	532271	6.91257e+06	6.81841e+06	9.61854e+06	6.23475e+06	6.77327e+06	6.32109e+06	5.9503e+06	7.77334e+06	5.38185e+06	4.22433e+06	1.19314e+07	4491122	8.17979e+06	5.40703e+06		0				0				0				0			93.9972	33.58	3	3		0				0
IPI00940508.1	20 kDa protein	33.33	4	7	7	13	0	0	0	0	0	0	0	0	0	0	0	0	0	0	0	0
IPI00011913.1	Heterogeneous nuclear ribonucleoprotein A0	32.79	1	8	9	44	6.74155e+06	4.77755e+06	4.86044e+06	1.08427e+07	6.63252e+06	6.78183e+06	0	0	2.77236e+07	2.49869e+07	2.77223e+07	1.39692e+07	2.05434e+07	1.00111e+07	0	0		0				0				0				0			62.2998	12.46	3	3	106.52	8.52	3	5
3318722	Chain E, Leech-Derived Tryptase InhibitorTRYPSIN COMPLEX	32.74	1	8	8	61	0	0	0	0	0	0	2.83589e+08	2.81127e+08	0	0	0	0	0	0	6.42796e+08	6.39036e+08																									202.853	17.04	4
IPI00414963.2;114652134	Isoform 2 of Polyadenylate-binding protein 2	32.43	12	7	7	40	0	0	7.45993e+06	5.26287e+06	0	0	2.02039e+07	1.95382e+07	0	0	2.08672e+07	3.74829e+06	2.47212e+06	0	2.01471e+08	1.94229e+08										0				0												0
45827706;IPI00514277.2	protein quaking isoform HQK-5 [Homo sapiens]	32.26	57	9	9	56	0	0	0	140910	1.10017e+07	2.69085e+06	2.68137e+06	2.70603e+06	1.93085e+06	0	1.98811e+06	7.26338e+06	1.61686e+07	3.42927e+06	1.34939e+07	1.12438e+07														0				0				0			103.494	14.66	4
311247379	PREDICTED: splicing factor 1-like [Sus scrofa]	31.69	5	5	25	117	0	0	0	0	0	0	2.27773e+07	2.1399e+07	0	0	0	0	0	0	2.4242e+08	1.41026e+08																									263.812	17.85	10
7657015;IPI00550689.3	tRNA-splicing ligase RtcB homolog [Homo sapiens]	31.68	10	17	17	103	0	0	2.15499e+06	3.32919e+06	2.26958e+06	1.05534e+06	1.45459e+07	8.6899e+06	1.46517e+06	1.54031e+06	4.66707e+06	1.70407e+06	3.36545e+06	0	2.74573e+07	2.4774e+07										0				0				0				0			237.562	8.32	4
IPI00304692.1	Heterogeneous nuclear ribonucleoprotein G	31.46	1	14	24	271	7.01529e+07	9.42214e+07	3.38881e+06	3.2263e+06	1.67256e+08	8.55027e+07	0	0	3.93121e+08	3.50736e+08	5.15882e+06	4.39068e+06	2.60093e+08	1.04668e+08	0	3.4696e+06	142.465	13.3	5	7	215.264	16.37	8	11	144.131	12.02	5	7	150.734	8.7	3	5	681.493	27.11	17	27	585.256	24.3	15	22
IPI00304925.5;167466173	Heat shock 70 kDa protein 1	31.36	30	13	15	61	0	0	1.49037e+07	1.45717e+07	3.02662e+06	1.70901e+06	4.52605e+06	4.31274e+06	2.2323e+06	2.09488e+06	3.82627e+07	3.91771e+07	8.48408e+06	2.34842e+06	1.31512e+07	1.27664e+07									172.292	12.48	6	6	141.396	12.17	6	6		0				0				0
IPI00909232.1	cDNA FLJ53542, highly similar to Heterogeneous nuclear ribonucleoproteins C	31.25	9	11	11	57	0	0	2.78908e+06	699484	1.3408e+07	2.84698e+07	0	0	1.62458e+06	1.24457e+06	1.77081e+06	1.50307e+06	1.51567e+07	1.71481e+06	0	0						0				0				0			272.397	23.26	8	10	106.148	22.92	5	5
IPI00006980.1	UPF0568 protein C14orf166	31.15	2	6	6	9	0	0	1.25346e+06	962731	0	0	0	0	0	0	1.57679e+06	2.51066e+06	404951	0	0	0										0				0
119569098	high mobility group nucleosomal binding domain 3, isoform CRA_c [Homo sapiens]	30.65	22	3	3	3	0	0	0	0	0	0	1.14488e+07	1.59829e+08	0	0	0	0	0	0	2.26975e+08	1.28974e+07																										0
IPI00909208.1;194388148	cDNA FLJ58832, highly similar to Heterogeneous nuclear ribonucleoprotein A3	30.34	12	4	14	42	1.24247e+07	3.25174e+07	3.69677e+07	2.99829e+07	1.26178e+08	7.03879e+07	6.64833e+06	4.59516e+06	2.23292e+08	2.64162e+08	7.1586e+07	6.66213e+07	1.91865e+08	8.51673e+07	3.84992e+08	1.11243e+08	281.458	23.84	7	8		0				0				0				0				0			207.978	14.24	4
114675112	PREDICTED: heterogeneous nuclear ribonucleoprotein M isoform 17 [Pan troglodytes]	30.06	4	3	17	77	0	0	0	0	0	0	3.80577e+06	3.76229e+06	0	0	0	0	0	0	5.02109e+06	7.10615e+06																									111.34	7.58	4
IPI00220484.3	High mobility group nucleosome-binding domain-containing protein 4	30	1	2	3	7	569528	765985	8.88829e+07	7.80209e+07	0	0	7.03284e+07	0	0	0	2.66761e+07	2.50156e+07	0	0	0	0		0				0				0				0												0
IPI00641351.1	RNA binding protein, autoantigenic	29.83	5	5	5	32	0	0	0	0	4.83821e+06	2.43671e+06	0	0	5.13378e+06	5.45229e+06	0	0	8.29387e+06	2.58221e+06	0	0																	115.848	29.28	4	5	69.3881	29.28	4	4
IPI00299024.9	Isoform 1 of Brain acid soluble protein 1	29.52	1	3	3	3	2.45309e+06	2.70786e+06	5.01502e+06	6.6449e+06	2.1076e+07	1.07674e+07	4.50487e+06	4.50692e+06	1.62808e+07	9.67776e+06	5.76591e+06	4.59145e+06	1.04422e+07	9.15971e+06	0	0		0				0				0				0				0				0				0
IPI00010740.1	Isoform Long of Splicing factor, proline- and glutamine-rich	29.28	1	24	24	114	2.48179e+06	3.16068e+06	3.84092e+06	3.57254e+06	4.36501e+07	1.59835e+07	1.88979e+07	1.679e+07	3.96121e+07	7.71951e+06	3.85709e+06	3.13361e+06	4.31693e+07	1.38569e+07	8.89204e+06	0	45.3504	4.95	3	3	78.8088	6.36	4	5	61.2931	4.81	3	3	99.491	4.81	3	3	285.139	16.12	13	14	224.359	14.99	14	15		0
IPI00903145.1;4506467	Radixin	28.99	21	9	21	154	4.02295e+06	5.77741e+06	1.67853e+07	1.63774e+07	8.7471e+06	6.45822e+06	1.09522e+06	716869	1.76966e+07	1.89116e+07	1.00343e+07	9.27695e+06	7.10488e+06	4.87155e+06	5.32168e+06	6.27928e+06	93.8141	5.15	5	5	133.28	13.04	8	9	330.785	23.67	14	19	436.606	25.04	16	21	251.003	16.47	10	11	180.932	13.72	8	10	149.988	5.83	3
IPI00909622.1;194373969	cDNA FLJ58787, highly similar to Cleavage stimulation factor 64 kDa subunit	28.93	10	6	12	53	0	0	1.09501e+07	1.13159e+07	2.33695e+06	3.12171e+06	0	1.2279e+07	5.99718e+06	5.02606e+06	1.13201e+07	1.12932e+07	3.54388e+06	2.61682e+06	2.89789e+06	2.42208e+07									183.706	20.07	8	8		0				0				0				0
25453472	elongation factor 1-delta isoform 2 [Homo sapiens]	28.83	7	6	6	10	0	0	0	0	0	0	0	0	0	2.86096e+06	0	0	5.03054e+06	0	0	0																		0
IPI00022402.3	Protein FAM32A	28.57	1	3	3	3	374491	474762	0	0	2.31157e+06	0	0	0	1.64254e+06	0	0	0	0	0	0	0		0				0												0
IPI00012382.3;4759156	U1 small nuclear ribonucleoprotein A	28.01	2	7	7	73	0	0	4.10005e+06	3.11985e+06	4.16529e+06	0	1.7917e+07	1.40179e+07	0	0	1.93981e+07	1.45505e+07	9.54199e+06	2.72069e+06	2.23411e+07	2.94886e+07									73.4416	13.12	3	3	72.146	13.12	3	4		0							240.506	15.25	3
IPI00843975.1	Ezrin	27.99	2	14	19	87	0	3.01181e+06	1.60351e+07	1.64451e+07	3.80373e+06	3.69144e+06	1.34673e+06	0	8.00265e+06	7.88607e+06	8.1174e+06	7.23913e+06	3.33873e+06	3.14656e+06	0	0						0			306.725	22.53	14	16	357.991	23.72	15	18	191.911	13.65	7	7	163.777	10.92	6	7		0
IPI00514561.1	Heterogeneous nuclear ribonucleoprotein K	27.57	7	12	12	74	1.48628e+06	2.04298e+06	487089	0	2.3751e+06	1.58742e+06	0	0	4.69922e+06	4.6354e+06	3.48157e+06	2.06114e+06	2.78859e+06	1.47261e+06	0	0		0				0				0							111.04	9.11	4	8	98.7217	9.58	4	7
IPI00384444.6	Keratin, type I cytoskeletal 14	27.33	1	2	13	63	3.02998e+06	2.27662e+06	7.17523e+06	4.80756e+06	7.9422e+06	5.29673e+06	3.79103e+06	3.92254e+06	1.44739e+07	1.39202e+07	1.77766e+07	1.58044e+07	2.17076e+07	9.72499e+06	2.45365e+07	8.33818e+06		0				0			125.868	12.92	6	6	194.009	14.19	6	6	171.406	16.1	7	7		0				0
IPI00012011.6;5031635	Cofilin-1	27.11	15	5	5	36	206566	0	5.27545e+06	5.30255e+06	994016	1.38711e+06	5.42406e+06	4.60314e+06	863580	777141	4075387	5.25981e+06	1.00994e+06	1319245	1.83972e+07	1.81599e+07		0							115.875	27.11	5	5	93.3239	18.67	4	4		0				0			103.496	19.28	3
IPI00894365.2	cDNA FLJ52842, highly similar to Actin, cytoplasmic 1	27.07	5	5	5	7	0	0	1.02837e+06	0	3.17061e+06	1.69497e+06	0	282151	0	0	1.09611e+06	1.15162e+06	0	0	0	0										0								0				0
226393	BPTI	27	1	3	4	6	0	0	0	0	0	0	1.3656e+08	1.3349e+08	0	0	0	0	0	0	6.52516e+08	6.4062e+08																										0
IPI00020991.2;8923040	CDKN2A interacting protein	26.9	5	12	12	96	600324	772083	789500	879663	7.02996e+06	3.19788e+06	5.15475e+06	4.90655e+06	7.41639e+06	7.28156e+06	2.36104e+06	2.49176e+06	1.22537e+07	4.47316e+06	9.08224e+06	1.22417e+07	79.5536	6.55	3	3	48.4738	8.79	3	3	64.5397	6.72	3	3	88.258	7.41	3	3	151.382	8.97	4	4	107.918	10.34	4	4	141.086	13.28	5
IPI00000861.1;5453710	Isoform 1 of LIM and SH3 domain protein 1	26.82	22	6	6	29	0	0	4.63364e+06	2.89754e+06	2.62491e+06	1.95456e+06	2.53402e+06	2.55738e+06	2.30418e+06	2.07981e+06	1.56531e+06	1.62436e+06	2.66385e+06	1.68722e+06	1.29529e+06	2.23118e+06									76.5915	20.31	4	4	73.1145	10.34	3	3	71.7478	16.09	3	3	50.6767	14.94	3	3	125.028	15.33	3
77695912;IPI00644708.1	nucleolysin TIAR isoform 2 [Homo sapiens]	26.79	19	13	13	71	0	0	1.41898e+06	0	0	0	2.91294e+06	3.51936e+06	0	0	6.80702e+06	1.09982e+07	4.13775e+06	2.54647e+06	1.12018e+07	1.169e+07										0															101.533	8.16	3
62632771	DNA-3-methyladenine glycosylase isoform c [Homo sapiens]	26.69	7	4	4	4	0	0	0	0	0	0	1.62227e+06	1.20424e+06	0	0	0	555965	0	0	0	0																										0
IPI00736859.1	Isoform 4 of Heterogeneous nuclear ribonucleoprotein U-like protein 1	26.46	4	20	20	122	0	0	1.66416e+07	1.602e+07	1.19211e+07	1.14288e+07	1.52528e+06	1.2703e+06	2.27319e+06	4.8311e+06	1.49621e+07	1.49534e+07	1.31913e+07	8.30162e+06	3.79995e+06	1.1149e+07									266.688	19.97	13	15	231.035	18.39	12	13	298.476	20.24	12	13	237.704	17.59	12	13		0
148680534	eukaryotic translation initiation factor 5A, isoform CRA_e [Mus musculus]	26.4	12	3	3	8	0	0	0	0	0	0	0	0	0	0	0	0	0	0	0	0
IPI00607824.2	Isoform 5 of Polyglutamine-binding protein 1	26.06	4	3	3	3	0	0	848485	898392	512835	0	0	2.32098e+06	0	0	1.25569e+06	0	0	0	6.43109e+06	0										0				0				0
IPI00909647.1;194385508	cDNA FLJ55159	25.44	4	6	6	9	0	0	5.4518e+06	3.58743e+06	1.10144e+07	5.71051e+06	0	0	8.70678e+06	8441751	4.14959e+06	3.23717e+06	5.52749e+06	0	0	9.40707e+06									61.1693	25	3	3		0				0				0
IPI00909890.1;194386744	cDNA FLJ58049, highly similar to RNA-binding protein FUS	25.41	37	8	11	112	2.34354e+06	3.63233e+06	3.58514e+06	2.50211e+06	3.15991e+07	1.74462e+07	2.39904e+06	2.42344e+06	8.07946e+06	1.35518e+07	5.65819e+06	4.28008e+06	2.51704e+07	1.45365e+07	2.43176e+06	1.27849e+06		0				0			94.9484	13.75	4	4	113.559	14.92	5	5	331.374	17.72	7	9	199.517	19.35	8	11		0
IPI00011726.1;4506589	Isoform 1 of RNA 3'-terminal phosphate cyclase	25.41	5	8	8	18	0	0	1.28789e+06	1.13375e+06	0	0	0	0	0	0	1.46124e+06	2.33784e+06	0	0	1.0466e+06	4.15051e+06									73.5594	11.75	3	3	60.5091	10.11	3	3
IPI00060627.2;19923969	Coiled-coil domain-containing protein 124	25.11	3	7	7	31	4.20242e+06	7.00358e+06	2.53334e+06	2.02976e+06	6.20532e+06	3.84904e+06	2.97323e+06	2.80454e+06	1.34953e+07	8.78797e+06	1.61261e+06	1.80425e+06	3.90443e+06	1.78611e+06	0	0		0			69.6018	12.11	4	4		0			64.5306	14.35	3	4	101.493	14.35	3	4	62.9659	14.35	3	4		0
IPI00465044.2;29789090	Protein RCC2	24.71	2	11	11	104	1.57043e+07	1.81718e+07	9.03828e+06	9.98094e+06	2.43553e+07	1.46383e+07	0	0	3.30054e+07	3.29681e+07	2.06736e+06	3.19793e+06	9.79142e+06	7.62956e+06	1.34673e+06	9.17875e+06	135.071	13.6	5	7	179.08	13.6	5	7	163.066	13.79	6	8	177.714	13.41	6	8	168.643	12.26	6	8	124.968	13.79	6	8
IPI00644497.4	Conserved hypothetical protein	23.89	9	6	6	9	0	0	0	0	0	0	0	0	0	0	0	0	5.74306e+06	1.88777e+06	0	0
IPI00061178.1	RNA binding motif protein, X-linked-like 1	23.85	1	4	14	65	3.25103e+06	3.33699e+06	959472	1.00486e+06	6.0255e+07	2.28936e+07	0	0	5.22045e+07	4.6999e+07	3.29655e+06	3.27142e+06	1.18085e+08	4.23164e+07	0	0		0				0				0				0			441.003	22.56	11	16	396.712	22.31	11	15
119577230	heterogeneous nuclear ribonucleoprotein L, isoform CRA_a [Homo sapiens]	23.52	16	2	8	20	0	0	0	0	0	0	1.30639e+07	13230912	0	0	0	0	0	0	5.69538e+06	4.14592e+06																										0
IPI00013894.1	Stress-induced-phosphoprotein 1	23.2	2	11	11	20	0	0	3.54124e+06	3.53662e+06	0	0	2.37197e+06	1.7656e+06	0	0	3.36914e+06	6.6386e+06	0	0	0	0										0			56.9927	11.05	5	5										0
IPI00007797.3	Fatty acid-binding protein, epidermal	22.96	1	4	4	4	722228	0	638827	0	0	0	0	0	910090	0	1.37712e+06	1.71098e+06	461116	0	0	0		0								0								0
114667176	PREDICTED: similar to Keratin, type I cytoskeletal 14 (Cytokeratin-14) (CK-14) (Keratin-14) (K14) [Pan troglodytes]	22.71	1	1	18	60	0	0	0	0	0	0	3.79103e+06	3.94739e+06	0	0	0	0	0	0	2.57546e+07	8.78279e+06																									138.116	5.77	5
IPI00465248.5	Isoform alpha-enolase of Alpha-enolase	22.58	1	7	7	10	0	0	1.39313e+06	1.49836e+06	0	0	0	351642	0	0	2.70854e+06	2.47947e+06	0	0	0	0									118.115	15.67	5	5	122.946	15.67	5	5
IPI00328840.9	THO complex 4	21.59	1	4	4	52	2.39909e+06	3.55027e+06	0	0	1.51948e+07	8.74217e+06	0	0	8.89267e+06	1.36751e+07	0	0	1.31068e+07	6.19889e+06	0	0		0				0											254.685	12.12	3	6	172.84	12.12	3	5
114637928	PREDICTED: similar to Chain X, Crystal Structure Of The Human Fen1-Pcna Complex isoform 1 [Pan troglodytes]	21.52	28	5	5	10	0	0	0	0	0	0	0	0	0	0	0	0	0	0	0	0
IPI00910614.1	heterogeneous nuclear ribonucleoprotein R isoform 4	21.24	5	6	11	20	0	1.21184e+06	4.6791e+06	5.88125e+06	2.79634e+06	1.10055e+06	1.81545e+07	1.67423e+07	5.37804e+06	5.07485e+06	2.00869e+07	1.73846e+07	1.24989e+07	7.24468e+06	1.52283e+07	5.73094e+07						0				0				0				0				0				0
IPI00013396.3;4507127	U1 small nuclear ribonucleoprotein C	20.75	32	4	4	17	0	0	5.12085e+06	6.06724e+06	5.94896e+06	3.49817e+06	0	0	0	0	3.5669e+06	3.35968e+06	2.64216e+06	0	3.07688e+07	3.08287e+07									126.072	20.13	3	4		0			135.69	20.75	4	5		0
146386739	Chain A, Solution Structure Of Nucleic Acid Binding Protein Cugbp1ab And Its Binding Study With Dna And Rna	20.32	21	3	3	3	0	0	0	0	0	0	0	0	0	0	0	0	0	0	2.21711e+06	2.23006e+06
IPI00396171.3;641916	Isoform 1 of Microtubule-associated protein 4	20.31	22	19	19	145	3.37675e+06	4.26372e+06	1.86324e+06	1.68881e+06	1.08436e+07	6.97844e+06	3.37949e+06	3.02774e+06	1.13807e+07	7.47577e+06	1.82569e+06	1.1684e+06	8.48799e+06	3.23561e+06	1.80538e+07	9.15447e+06	99.7415	5.9	6	6	194.993	10.59	9	10	85.5224	5.9	5	5	56.5795	3.73	3	3	154.968	7.2	6	8	219.897	11.11	9	11	171.155	5.38	5
73971009	PREDICTED: similar to PC4 and SFRS1 interacting protein 1 isoform 1 isoform 3 [Canis familiaris]	20.23	23	1	7	20	0	0	0	0	0	0	991272	2.13837e+06	0	0	0	0	0	0	9.1427e+06	9.72976e+06																									115.743	12.82	4
IPI00450768.7	Keratin, type I cytoskeletal 17	19.91	1	5	10	18	4.62298e+06	2.65089e+06	4.99199e+06	2.25852e+06	4.48722e+06	2.62703e+06	0	0	2.72259e+07	2.62304e+07	1.77766e+07	1.58044e+07	2.17076e+07	8.19233e+06	0	8.41721e+06		0				0				0				0				0				0
IPI00007063.5	Hepatoma-derived growth factor-related protein 3	19.7	1	3	3	6	2.94946e+06	3.49835e+06	2.1215e+06	3.05601e+06	5.97411e+06	2.2231e+06	0	0	452505	434218	1.72291e+06	1.18817e+06	3.83242e+06	2929077	0	0		0				0				0				0				0				0
IPI00100151.4;18860916	Isoform 1 of 5'-3' exoribonuclease 2	19.68	24	17	17	58	0	643682	0	0	0	0	0	0	0	0	7.4813e+06	7.79965e+06	889395	905369	2.26483e+07	1.03299e+07						0
IPI00798375.2	cDNA FLJ59357, highly similar to Probable ATP-dependent RNA helicase DDX5	19.67	2	10	12	24	0	0	1.11902e+06	909966	1.3746e+06	382200	0	0	0	1.00838e+06	4.04581e+06	5.59896e+06	1.22164e+06	0	0	0										0				0				0				0
IPI00016610.2	Poly(rC)-binding protein 1	19.66	1	4	4	4	0	0	0	0	0	0	0	0	0	0	1.12959e+06	793114	0	0	2.27721e+06	2.16752e+06
IPI00478896.3	Ribosomal protein L7a	19.37	3	5	5	26	7.93368e+06	1.24633e+07	0	0	6.95703e+06	2.63545e+06	0	0	2.87398e+07	1.59387e+07	0	0	2.41137e+06	2.81364e+06	0	0	55.2341	13.09	3	3		0											25.8067	10.99	3	4		0
IPI00217465.5	Histone H1.2	19.25	1	2	3	9	1.44684e+06	1.45898e+06	0	0	2.26001e+06	927726	0	0	2.89991e+06	4.56365e+06	0	0	0	0	0	0		0				0												0				0
IPI00942979.1;4507521	Transketolase	18.94	15	10	10	21	111618	0	4.24335e+06	2.46466e+06	0	0	1.27996e+06	1.84067e+06	829220	191264	1.29183e+06	893394	1.92456e+06	789283	0	0		0							148.12	18.94	10	11	96.2374	11.56	5	6									157.296	9.47	3
IPI00179964.5;14165466	Isoform 1 of Polypyrimidine tract-binding protein 1	18.83	17	10	10	100	0	7.14579e+06	4.65281e+07	3.68382e+07	1.78892e+07	7.1639e+06	2.11823e+08	2.24528e+08	1.69828e+07	1.77187e+07	1.0541e+08	9.73367e+07	5.73039e+07	1.78663e+07	3.83196e+08	3.70298e+08						0			88.9162	6.21	3	4	69.0102	6.21	3	4	87.9595	6.21	3	6		0				0
IPI00746438.2	Isoform 2 of 60S ribosomal protein L11	18.64	2	3	3	3	0	0	0	0	3.35603e+06	1.64377e+06	0	0	1.74594e+06	1.61153e+06	0	0	2.23991e+06	1.43323e+06	0	0																		0				0
IPI00033611.5	Isoform 2 of RNA-binding motif, single-stranded-interacting protein 1	18.36	3	6	7	37	139096	130438	0	0	1.59425e+07	7.80416e+06	0	0	1.07895e+07	1.04186e+07	0	0	2.3288e+07	1.14342e+07	0	0		0				0											104.524	9.68	4	5	90.449	13.15	4	4
327280715	PREDICTED: splicing factor U2AF 65 kDa subunit-like isoform 1 [Anolis carolinensis]	17.98	10	5	5	15	0	0	0	0	0	0	1.57995e+06	1.29286e+06	0	0	0	0	0	0	6.90315e+06	6.90126e+06																										0
1351907	RecName: Full=Serum albumin; AltName: Full=BSA; AltName: Allergen=Bos d 6; Flags: Precursor	17.96	2	2	9	17	0	0	0	0	0	0	1.75954e+06	1.36329e+06	0	0	0	0	0	0	0	1.49018e+06																									180.327	12.69	6
IPI00645452.1	Tubulin, beta	17.84	3	6	6	11	0	0	0	0	0	0	0	0	0	0	2.95555e+06	3.04712e+06	0	0	0	0
IPI00383423.3;28372509	Isoform 1 of Coiled-coil domain-containing protein 50	17.65	2	5	5	18	0	0	2.64796e+06	2.60737e+06	0	0	1.18966e+06	1.30561e+06	0	0	981225	1.07072e+06	0	0	0	0									96.2241	17.65	5	6	98.3759	17.65	5	5									108.605	12.09	3
IPI00002501.1	Cyclic AMP-dependent transcription factor ATF-1	17.34	1	3	4	7	0	0	2.50315e+06	1.76282e+06	4.4048e+06	1.55607e+06	0	0	736006	0	2.52268e+06	2.29341e+06	3.53024e+06	0	0	0										0			39.9059	17.34	3	3		0				0
IPI00761069.1	calpastatin isoform f	17.33	11	7	7	10	0	0	0	0	1.29593e+06	0	0	0	0	0	0	0	1.74558e+06	0	0	0																	102.153	13.47	5	6
IPI00020194.1	Isoform Short of TATA-binding protein-associated factor 2N	17.32	2	6	9	45	2.07275e+06	2.30071e+06	829842	538375	2.01457e+07	1.0615e+07	2.39904e+06	2.42344e+06	1.05945e+07	8.87705e+06	2.48821e+06	3.01591e+06	1.86527e+07	8.91829e+06	0	0	67.8534	6.96	3	4	57.9961	8.66	3	4		0				0				0			117.912	11.38	5	7		0
IPI00021266.1	60S ribosomal protein L23a	17.31	2	4	4	6	2.35237e+06	2.75095e+06	0	0	2.84046e+06	1.99712e+06	0	0	7.20798e+06	4.79988e+06	0	0	416316	365685	0	0		0				0											108.544	17.31	4	6		0
IPI00793930.1	TUBA1B protein	17.31	6	4	4	7	0	0	0	0	0	0	0	0	0	0	1.11032e+06	861450	0	0	583237	0
IPI00893062.1	X-ray repair complementing defective repair in Chinese hamster cells 6	17.17	3	11	11	33	0	669682	2.20109e+06	0	1.2403e+07	9.58191e+06	0	0	1.28036e+07	1.19102e+07	7.4877e+06	4.71266e+06	1.60985e+07	4.32306e+06	2.73641e+06	2.81269e+06						0				0							109.197	4.47	4	7		0
IPI00937615.2;4503481	Elongation factor 1-gamma	17.16	35	6	6	7	0	0	0	0	0	0	0	0	0	0	704618	1.07425e+06	1.86171e+06	1.06684e+06	0	1.76858e+06
IPI00643041.3	GTP-binding nuclear protein Ran	17.13	2	4	4	6	0	1.08606e+06	3.16727e+06	3.94515e+06	0	1.02439e+06	1.88771e+07	1.87564e+07	0	0	5.4723e+06	3.57512e+06	0	1.27915e+06	3.87295e+06	0						0			39.9222	10.65	3	3		0								0				0
116283586	RNMT protein [Homo sapiens]	17.07	4	4	4	14	0	0	0	0	0	0	8.36647e+06	7.1789e+06	0	0	0	0	0	0	1.18395e+07	5.07455e+06																										0
IPI00398673.4	Putative uncharacterized protein ENSP00000383249	16.67	3	3	3	6	0	0	0	0	0	0	0	0	0	0	0	0	0	0	0	0
IPI00878075.1	23 kDa protein	16.5	8	4	4	6	0	0	3.37533e+06	2.46826e+06	0	0	402021	0	0	0	2.00166e+06	1.90434e+06	0	0	0	0									33.2116	11	3	3	54.6546	12	3	3										0
229552	albumin	16.35	1	1	8	17	0	0	0	0	0	0	1.22062e+06	1.36329e+06	0	0	0	0	0	0	0	1.49018e+06																										0
IPI00556173.1;212549555	Isoform 6 of Interleukin enhancer-binding factor 3	16.29	58	7	9	25	0	0	505955	0	1.15551e+06	0	0	0	0	0	2.24213e+06	2.09578e+06	1.50007e+06	0	4.03843e+07	3.88468e+07										0								0
IPI00470805.2	Isoform 2 of Mediator of DNA damage checkpoint protein 1	16.16	8	13	13	19	5.8959e+06	6.66737e+06	0	0	7.12311e+06	2.67095e+06	0	0	5.82308e+06	0	0	0	2.27875e+06	0	0	0		0				0											215.112	8.82	7	9		0
IPI00909077.1	cDNA FLJ60514, highly similar to Fructosamine-3-kinase	15.84	2	3	3	3	0	0	1.04515e+06	1.41454e+06	0	0	0	0	0	0	0	1.18304e+06	0	0	0	0									95.7419	15.84	3	3		0
IPI00021536.2	Calmodulin-like protein 5	15.75	1	4	4	13	1.03832e+06	1.74503e+06	2.44173e+06	0	1.06863e+07	3.56615e+06	0	0	6.05297e+06	6.39331e+06	5.66569e+06	9.6796e+06	8.53815e+06	4.01631e+06	7.14002e+06	0		0				0				0								0				0
IPI00845305.2;194376026	cDNA FLJ57962, highly similar to Homo sapiens eukaryotic translation initiation factor (eIF) 2A (eIF2A), mRNA	15.46	16	6	6	66	2.20834e+06	819879	565552	5.87096e+06	1.0363e+07	4.33706e+06	1.90892e+07	1.36077e+07	1.03544e+07	1.10834e+07	8.69108e+06	6.54007e+06	1.1707e+07	3.8508e+06	1.82264e+06	1.70684e+07		0				0				0				0			142.179	8.97	3	5	123.553	8.97	3	4		0
IPI00012442.1	Ras GTPase-activating protein-binding protein 1	15.45	2	7	7	72	7.57918e+06	1.18851e+07	702695	646577	4.47218e+06	2.87269e+06	0	0	2.66294e+07	1.34329e+07	3.99847e+06	3.78028e+06	6.84579e+06	1.33086e+07	0	0	68.9147	5.15	3	3	74.8733	5.15	3	3		0				0			137.748	11.37	5	10	166.266	11.37	5	12
38569421;IPI00021290.5	ATP-citrate synthase isoform 1 [Homo sapiens]	15.35	18	13	13	59	0	0	0	491435	0	0	8.89108e+06	4.77277e+06	0	594232	1.54851e+06	1.95807e+06	5.54286e+06	1.95363e+06	1.31133e+07	1.59254e+07														0											182.046	3.54	3
IPI00003438.2	DnaJ homolog subfamily C member 8	15.02	1	4	4	6	0	0	5.79026e+06	584784	0	0	852935	1.4815e+06	0	0	3.77154e+06	2.64922e+06	0	0	5.23607e+06	1.76292e+06										0			36.0788	11.46	3	3										0
IPI00848226.1	Guanine nucleotide-binding protein subunit beta-2-like 1	14.2	1	4	4	5	0	0	865736	1.10685e+06	837260	0	0	0	0	0	988120	1.37527e+06	1.11612e+06	0	0	0										0				0				0
IPI00217467.3	Histone H1.4	14.16	1	2	3	3	1.45407e+06	1.49215e+06	0	0	1.42395e+06	757737	0	0	3.03741e+06	4.68037e+06	0	0	0	0	0	0		0				0												0				0
IPI00217468.3	Histone H1.5	14.16	1	3	3	3	702820	1.59376e+06	0	0	1.38305e+06	867520	0	0	1.47153e+06	0	0	0	0	0	0	0		0				0												0				0
IPI00003362.2	HSPA5 protein	14.05	1	5	7	12	0	0	3.98545e+06	3.9603e+06	0	0	0	0	0	0	1.00906e+07	1.03453e+07	0	849051	3.53757e+06	3.94777e+06										0				0
IPI00645329.1	46 kDa protein	13.9	2	4	4	7	0	0	1.97286e+06	2.46612e+06	0	0	637663	726826	0	0	6.28807e+06	5.72168e+06	0	0	7.26395e+06	1.02154e+07										0				0												0
IPI00419919.5	60S ribosomal protein L29	13.84	2	3	3	6	1.95147e+07	1.18731e+07	0	0	7.35791e+07	2.16133e+07	0	0	2.88238e+07	27632325	1.06812e+06	1.15878e+06	4.15577e+07	2.04117e+07	0	0		0				0												0				0
IPI00221345.1	Isoform 1 of YTH domain family protein 1	13.77	2	4	5	5	1.37594e+07	1.58392e+07	0	0	1.84667e+06	0	0	0	2.57942e+07	5.36212e+07	0	0	1.08299e+07	8.20501e+06	0	0		0				0												0
IPI00397024.1	Isoform 2 of YTH domain family protein 2	13.61	3	7	8	12	1.37594e+07	1.58392e+07	0	0	3.99382e+06	1.04306e+06	3.04841e+06	3.25462e+06	1.82537e+07	2.78963e+07	0	0	1.61922e+07	1.07769e+07	5.34236e+06	4.78738e+06		0				0												0				0				0
IPI00550906.6	Cleavage stimulation factor 64 kDa subunit, tau variant	13.31	1	1	7	13	0	0	6.72705e+06	6.95575e+06	2.33695e+06	0	1.97042e+06	2.00746e+06	1.91515e+06	2.957e+06	6.92186e+06	6.31935e+06	1.99914e+06	0	0	8.5972e+06									214.542	12.5	6	6	167.255	13.31	7	7		0								0
IPI00004655.1	Protein FRG1	12.79	1	4	4	9	1.97811e+06	2.64894e+06	0	0	0	0	0	0	3.05256e+06	4.23157e+06	0	0	858322	1.07596e+06	0	0		0				0																0
IPI00794875.1	41 kDa protein	12.63	2	5	5	20	4.12805e+06	3.41027e+06	1.39689e+06	0	0	0	1.01291e+06	1.2841e+06	9.57723e+06	6.96142e+06	1.58726e+06	2.2307e+06	1.26745e+06	949876	0	0		0			103.016	8.06	3	3		0																0
157277948	radixin isoform a [Mus musculus]	12.35	27	1	8	23	0	0	0	0	0	0	1.09522e+06	876043	0	0	0	0	0	0	5.32168e+06	6.27928e+06																									149.988	5.83	3
IPI00893055.1	25 kDa protein	12.34	3	3	3	3	514096	755014	0	0	0	0	0	0	520890	0	0	0	0	0	0	0		0				0												0
IPI00221106.5	splicing factor 3B subunit 2	12.29	1	10	10	35	824408	736500	0	0	0	0	0	0	0	0	0	0	0	0	0	0		0				0
230867	Chain R, Twinning In Crystals Of Human Skeletal Muscle D- Glyceraldehyde-3-Phosphate Dehydrogenase	12.28	1	2	3	6	0	0	0	0	0	0	1.94343e+06	1.69796e+06	0	0	0	0	0	0	3.91427e+06	3.70538e+06																									142.304	12.28	3
IPI00293254.1	Isoform EWS-B of RNA-binding protein EWS	12.01	7	7	7	42	5.26625e+06	6.31455e+06	0	0	1.2297e+07	5.71643e+06	0	0	9.69147e+06	8.78987e+06	0	0	9.00598e+06	3.90641e+06	0	0		0				0											201.041	8.75	5	6	78.6562	9.61	4	4
114582388	PREDICTED: chaperonin isoform 9 [Pan troglodytes]	12.01	28	4	4	4	0	0	0	0	0	0	0	0	0	0	0	0	0	0	0	0
158147453	heat shock protein 70 kDa [Demania scaberrima]	11.65	1	1	7	8	0	0	0	0	0	0	5.75213e+06	8.15887e+06	0	0	0	0	0	0	9.17793e+06	9.93759e+06																										0
IPI00021417.3	U4/U6.U5 tri-snRNP-associated protein 1	11.38	1	6	6	10	0	514658	0	0	1.49228e+06	0	0	0	1.38637e+06	0	0	0	716288	0	0	0						0												0
IPI00889541.2;38201710	Isoform 4 of Probable ATP-dependent RNA helicase DDX17	11.25	28	6	8	14	2.39523e+06	2.52224e+06	8.021e+06	7.43585e+06	6.97719e+06	5.47641e+06	6.13999e+06	5.82268e+06	3.99484e+06	3.53079e+06	3.91957e+06	5.49396e+06	5.95105e+06	4.59072e+06	4.17201e+06	3.96204e+06		0				0				0				0				0				0				0
IPI00172474.3	Isoform 2 of Zinc finger protein 91 homolog	11.15	2	3	3	9	6.46241e+06	7.70996e+06	0	0	1.53945e+07	7.25368e+06	377392	459900	1.88928e+07	1.79201e+07	0	0	1.11908e+07	3.07392e+06	0	0		0				0											105.154	11.15	3	3	122.991	11.15	3	3		0
IPI00449049.5;156523968	Poly [ADP-ribose] polymerase 1	10.95	12	8	8	27	0	567092	2.885e+06	5.50472e+06	2.56341e+06	1.48357e+06	3.97073e+06	5.4749e+06	1.88857e+06	725614	4.11832e+06	3.84352e+06	3.38858e+06	0	0	0						0			112.242	3.94	3	3		0				0				0			121.008	3.94	3
IPI00915274.1	dyskerin isoform 2	10.81	2	4	4	10	205697	225839	0	0	1.28005e+06	0	0	0	2.46414e+06	338765	0	0	0	0	0	0		0				0												0
IPI00910728.1	cDNA FLJ57599, moderately similar to Eukaryotic translation initiation factor 3 subunit 1	10.78	2	3	3	7	310945	520495	3.63303e+06	9.5581e+06	16128029	5.38684e+06	0	0	0	1.18793e+06	4082112	0	7.01047e+06	0	0	0		0				0			54.4591	10.78	3	3		0				0				0
IPI00794246.1	36 kDa protein	10.73	5	3	3	3	0	0	0	0	662698	0	0	0	958314	845097	0	550426	1.43125e+06	1.33169e+06	0	0																		0
IPI00328715.4	Protein LYRIC	10.65	1	5	5	7	1.06606e+06	2.19878e+06	0	0	5.62733e+06	3.02817e+06	0	1.30924e+06	8.31181e+06	7.87811e+06	0	0	0	3.08792e+06	0	0		0				0												0				0
24308207	leucine-rich repeat-containing protein 47 [Homo sapiens]	10.29	1	5	5	8	0	0	0	0	0	0	0	0	0	0	0	0	0	0	0	0
IPI00219217.3	L-lactate dehydrogenase B chain	10.18	1	3	3	3	0	0	1.96088e+06	1.5383e+06	0	0	0	0	0	0	2.33736e+06	2.59531e+06	0	0	0	0										0			56.09	10.18	3	3
IPI00382804.1	EEF1A protein (Fragment)	10.13	7	3	3	3	0	5.58403e+06	1.3135e+06	0	1.25186e+07	0	0	0	0	0	4.6489e+06	4.61959e+06	7.8532e+06	1.23008e+06	0	0						0				0								0
IPI00025815.2	TDP43	10.1	2	4	4	6	869115	1.01249e+06	0	0	0	0	0	0	3.80095e+06	3.00152e+06	2.72456e+06	2.81476e+06	0	2.10263e+06	0	0		0				0
IPI00006379.1	Nucleolar protein 58	10.02	1	3	3	4	990547	1.00261e+06	0	0	3.97571e+06	2.05519e+06	0	0	2.17928e+06	2.44864e+06	0	0	0	965367	0	0		0				0												0				0
IPI00943203.1	cDNA FLJ11695 fis, clone HEMBA1005019, highly similar to Homo sapiens SCC-112 protein (SCC-112), mRNA	9.91	3	3	3	3	0	1.296e+06	0	0	2.54039e+06	823414	0	0	2.1725e+06	2.84243e+06	0	0	0	0	0	0						0												0				0
90075792	unnamed protein product [Macaca fascicularis]	9.73	17	3	3	6	0	0	0	0	0	0	0	0	0	0	0	0	0	0	0	0
IPI00220834.8	ATP-dependent DNA helicase 2 subunit 2	9.7	1	6	6	10	0	0	0	0	0	0	0	0	0	8.45741e+06	4.68245e+06	5.185e+06	7.18621e+06	1.38737e+06	0	0
IPI00418471.6	Vimentin	9.66	1	3	3	3	0	0	0	0	389426	0	0	0	0	0	0	0	0	0	0	0																		0
IPI00003706.1	RNA-binding motif, single-stranded-interacting protein 2	9.58	2	3	4	4	0	0	0	0	6.18127e+06	3.532e+06	0	0	1.76535e+07	9.74225e+06	0	0	1.15101e+07	1.11443e+07	0	0																		0				0
30506;IPI00025753.1	desmoglein type 1 [Homo sapiens]	9.53	3	8	8	23	0	0	349995	0	1.0763e+06	176037	1.31353e+06	1.11227e+06	1.29674e+06	1.09388e+06	1.07907e+06	745672	732181	0	9.13595e+06	9.88281e+06										0								0				0				0
IPI00293655.3;4826686	ATP-dependent RNA helicase DDX1	9.46	27	6	6	14	0	0	428581	422879	0	0	1.04492e+06	1.07183e+06	0	0	2.38432e+06	2.04101e+06	1378439	0	3.05289e+06	3.22136e+06										0				0												0
IPI00909570.1	cDNA FLJ56548, highly similar to Elongation factor 2	9.36	2	4	4	6	0	0	2.02111e+06	0	0	0	0	0	0	0	1145551	1.28434e+06	0	0	0	0									105.652	7.6	3	3		0
IPI00104050.3	Thyroid hormone receptor-associated protein 3	9.32	1	10	10	53	2.10652e+06	1.74864e+06	0	0	3.97212e+06	1.97097e+06	0	0	5.88045e+06	5.8093e+06	672341	0	2.25844e+06	0	0	0		0			72.3494	3.66	3	3									117.502	4.61	4	5		0
119604309	zinc finger CCCH-type, antiviral 1, isoform CRA_b [Homo sapiens]	9.22	8	3	3	3	0	0	0	0	0	0	0	710752	0	0	0	0	0	0	4.14984e+06	0
IPI00789324.3	cDNA FLJ60424, highly similar to Junction plakoglobin	9.06	1	3	5	11	4.62298e+06	4.9577e+06	5.24586e+06	1.78156e+06	1.91459e+06	1.05073e+06	9.08934e+06	0	1.4797e+07	1.44151e+07	1.56672e+07	1.3369e+07	1.70887e+07	6.56398e+06	3.0287e+06	6.24945e+06		0				0				0				0				0				0				0
193787621	unnamed protein product [Homo sapiens]	9.03	6	3	3	3	0	0	0	0	0	0	1.42291e+06	2.01049e+06	0	0	0	0	0	0	0	0																										0
IPI00910754.1	lactate dehydrogenase A isoform 2	8.76	6	3	3	3	0	0	2.62629e+06	5.10174e+06	0	0	0	0	0	0	0	2.78276e+06	0	0	0	0									42.9815	8.76	3	3		0
IPI00216953.1	Isoform ADelta10 of Lamin-A/C	8.52	4	4	4	9	0	0	1.2336e+06	1.19213e+06	2.28053e+06	2.46419e+06	0	0	822233	802367	1.87747e+06	614196	2.78165e+06	1.25971e+06	0	0										0				0				0				0
IPI00329633.5	Threonyl-tRNA synthetase, cytoplasmic	8.02	3	6	6	12	0	214760	6.54367e+06	3.43143e+06	5.00365e+06	2.04245e+06	3.36011e+06	3.48481e+06	0	0	2.5449e+06	4.55522e+06	0	1.39104e+06	0	0						0			72.3416	8.02	6	6	68.9913	4.84	3	3		0				0				0
IPI00413173.3	Isoform Short of Antigen KI-67	7.87	2	15	15	34	575252	1.27697e+06	0	0	2.8696e+06	1.94194e+06	0	0	1.70649e+06	2.42239e+06	0	0	1.29538e+06	876159	0	0		0			33.8294	1.62	3	3									212.815	6.32	11	12	152.03	6.66	11	11
IPI00647720.1	Isoform 1 of Serine/arginine repetitive matrix protein 1	7.63	2	5	5	12	0	3.05379e+06	0	0	2.90357e+06	1.8189e+06	0	0	0	1.82696e+06	0	0	0	0	0	0						0												0				0
IPI00299254.3	Eukaryotic translation initiation factor 5B	7.3	1	6	6	19	0	0	0	0	0	0	0	0	0	0	0	0	0	0	0	0
164698494	septin-9 isoform a [Homo sapiens]	7.17	2	3	3	3	0	0	444788	0	0	0	1.03721e+06	839394	0	0	0	0	0	0	0	0										0																0
IPI00008449.1	Isoform 3 of Pre-mRNA 3'-end-processing factor FIP1	7.12	3	3	3	3	3.32622e+06	0	0	0	1.17648e+07	6.9325e+06	0	0	0	6.88378e+06	0	0	0	0	0	0		0																0				0
IPI00030012.4	Putative uncharacterized protein MAP7D1	7.05	4	3	3	3	1.15054e+06	1.76413e+06	0	0	0	0	0	0	2.22843e+06	0	0	0	0	0	0	0		0				0
IPI00797452.2	cDNA FLJ55805, highly similar to Keratin, type II cytoskeletal 4	6.96	2	3	3	3	4.04881e+06	4.35622e+06	5.4761e+06	5.67497e+06	1.11756e+07	8.10912e+06	0	0	3.66451e+07	3.49014e+07	1.30602e+07	1.56942e+07	7.26292e+06	6.32717e+06	0	7.87665e+06		0				0				0				0				0				0
IPI00472891.2	SWI related protein	6.95	4	5	5	16	3.62938e+06	0	0	0	2.70486e+06	4.08934e+06	0	0	1.10242e+07	7.626e+06	0	0	4.78108e+06	2.39168e+06	0	0		0															60.7539	3.64	3	3		0
IPI00386975.3	Isoform 1B of Desmocollin-1	6.9	2	4	4	8	0	0	0	0	0	0	0	0	0	0	0	0	0	0	0	2.04632e+06
IPI00414676.6	Heat shock protein HSP 90-beta	6.22	1	4	4	6	0	0	0	0	0	0	0	0	0	0	1.44006e+06	1.17844e+06	675370	0	0	0
IPI00013933.2	Isoform DPI of Desmoplakin	6.13	1	17	17	26	0	0	0	0	723789	0	0	0	797507	0	605498	607077	0	0	0	2.23549e+06																		0
IPI00171127.1	Ubiquitin-associated protein 2	6.08	3	5	5	20	0	0	0	0	5.4003e+06	1.357e+06	1.12985e+06	1.2507e+06	5.4478e+06	5.10324e+06	976012	0	4.56293e+06	1.47898e+06	0	0																	160.542	6.08	5	5		0				0
IPI00171217.2	Isoform 1 of A-kinase anchor protein 2	5.94	3	3	3	12	661245	856566	0	0	0	0	0	0	0	0	0	0	0	0	0	0		0				0
IPI00306369.3	tRNA (cytosine-5-)-methyltransferase NSUN2	5.87	1	4	4	6	0	0	0	0	0	0	0	0	0	0	1.20749e+06	957904	639625	0	0	0
296232891	PREDICTED: LOW QUALITY PROTEIN: interleukin enhancer-binding factor 3-like [Callithrix jacchus]	5.47	53	2	4	12	0	0	0	0	0	0	0	0	0	0	0	0	0	0	4.03843e+07	3.88468e+07
26335437	unnamed protein product [Mus musculus]	5.38	17	3	3	6	0	0	0	0	0	0	340827	0	0	0	0	0	0	0	0	0																										0
IPI00873244.1	Isoform Short of Cold shock domain-containing protein E1	4.56	3	3	3	3	0	0	0	0	2.44696e+06	1.5354e+06	0	0	1.62605e+06	0	827538	970894	1.99981e+06	1.40016e+06	0	0																		0				0
IPI00908876.1	cDNA FLJ50830, highly similar to Serum albumin	4.21	3	3	3	3	2.18936e+06	1.39253e+06	2.03489e+06	3.4974e+06	0	2.00782e+06	0	0	4.39823e+06	5.7194e+06	796256	2.70118e+06	0	2.83228e+06	0	0		0				0				0				0								0
IPI00006025.1	Isoform 1 of Squamous cell carcinoma antigen recognized by T-cells 3	4.05	1	3	3	3	0	0	0	0	2.59562e+06	402087	0	0	5.69821e+06	1.26735e+07	0	0	2.25221e+06	2.11171e+06	0	0																		0				0
IPI00876984.2	Putative uncharacterized protein AHCTF1 (Fragment)	3.78	4	6	6	14	982671	1.26921e+06	0	0	0	0	0	0	0	0	0	0	0	0	0	0		0				0
IPI00940155.1	227 kDa protein	3.65	21	4	4	6	0	0	0	0	4.59498e+06	1.98113e+06	0	0	3.02783e+06	0	0	0	6.56826e+06	0	0	0																	116.017	3.13	3	3		0
IPI00786995.1	similar to protein kinase, DNA-activated, catalytic polypeptide	3.03	3	11	11	41	1.7411e+06	1.14857e+06	0	0	3.07377e+06	757526	0	0	3.51312e+06	2.11221e+06	1.10093e+06	692852	0	822584	0	0		0			79.6778	1.34	4	4										0				0
IPI00181641.5	Isoform 2 of YLP motif-containing protein 1	2.85	4	3	3	3	0	1.24809e+06	0	0	0	0	0	0	0	0	0	0	0	0	0	0						0
IPI00220918.1	Isoform 2 of DNA (cytosine-5)-methyltransferase 1	2.57	2	4	4	4	0	1.3704e+06	0	708218	2.81136e+06	752458	0	761730	5.06214e+06	0	507081	0	2.77627e+06	0	0	0						0								0			51.3781	2.57	4	4		0
IPI00936444.2	Mucin-5B	2.33	3	5	5	9	0	0	0	0	0	0	0	0	0	0	0	0	5.40087e+06	1193070	0	0
IPI00782992.3	Isoform 1 of Serine/arginine repetitive matrix protein 2	2.25	1	5	5	10	0	0	0	0	0	0	0	0	0	0	0	0	0	0	0	0
IPI00909642.1	Filamin A	2.03	4	3	3	3	0	0	0	0	0	0	0	0	0	0	0	0	2.04839e+06	997862	0	0
IPI00221325.3	E3 SUMO-protein ligase RanBP2	1.86	1	3	3	3	0	0	0	0	724434	375232	0	0	0	0	0	0	555601	0	0	0																		0				0
IPI00217709.1	Isoform Beta-1 of DNA topoisomerase 2-beta	1.48	2	3	3	3	0	0	0	0	0	0	0	0	0	0	0	0	0	0	0	0
IPI00902970.1	Isoform 2 of BAT2 domain-containing protein 1	1.32	9	4	4	6	0	0	0	0	1.85394e+06	2.20118e+06	0	0	2.03268e+06	3.19965e+06	0	0	1.02631e+06	0	0	0																	37.4953	1.21	3	3		0
							1.67232e+09	2.02915e+09	7.62371e+09	6.61185e+09	8.23187e+09	4.10698e+09	7.63958e+09	6.82701e+09	1.02007e+10	1.02986e+10	1.24079e+10	1.21822e+10	1.19056e+10	5.05922e+09	3.44501e+10	3.46917e+10
							low	low	low	low	low	low	low	low	high	high	high	high	high	high	high	high
[truncated: 40 more columns]

## Sheet: normalized median lane
							low risk (HMVEC)	low risk (HMVEC)	low risk (HeLa #1)	low risk (HeLa #1)	low risk (HeLa #2)	low risk (HeLa #2)	low risk (HeLa com)	low risk (HeLa com)	high risk (HMVEC)	high risk (HMVEC)	high risk (HeLa #1)	high risk (HeLa #1)	high risk (HeLa #2)	high risk (HeLa #2)	high risk (HeLa com)	high risk (HeLa com)	low risk (HMVEC)				low risk (HMVEC)				low risk (HeLa #1)				low risk (HeLa #1)				low risk (HeLa #2)				low risk (HeLa #2)				low risk (HeLa com)
Accession	Description	ΣCoverage	Σ# Proteins	Σ# Unique Peptides	Σ# Peptides	Σ# PSMs	A4: Area	B4: Area	C4: Area	D4: Area	E4: Area	F4: Area	G2: Area	H2: Area	I4: Area	J4: Area	K4: Area	L4: Area	M4: Area	N4: Area	O2: Area	P2: Area	Score A2	Coverage A2	# Peptides A2	# PSM A2	Score B2	Coverage B2	# Peptides B2	# PSM B2	Score C2	Coverage C2	# Peptides C2	# PSM C2	Score D2	Coverage D2	# Peptides D2	# PSM D2	Score E2	Coverage E2	# Peptides E2	# PSM E2	Score F2	Coverage F2	# Peptides F2	# PSM F2	Score G4	Coverage G4	# Peptides G4
257472075	Chain A, Ribonuclease A With Asn 67 Replaced By A Beta-Aspartyl Residue	100	1	4	19	350	0	0	0	0	0	0	0.0402272	0.0427342	0	0	0	0	0	0	0.0673128	0.0735611																									1203.66	75.81	8
157837075	Chain A, Comparison Of Two Independently Refined Models Of Ribonuclease-A	100	6	4	20	341	0	0	0	0	0	0	0.0399044	0.0426533	0	0	0	0	0	0	0.0673128	0.0735611																									1091.15	75.81	8
309320653	Chain b, Semi-Synthetic Ribonuclease S: Para-Cyano-Phenylalanine At Position 8	100	3	2	4	20	0	0	0	0	0	0	0.011563	0.00966842	0	0	0	0	0	0	0.00364383	0.0043322																										0
IPI00465365.4;4504445	Isoform A1-A of Heterogeneous nuclear ribonucleoprotein A1	95.63	3	2	48	499	0.0985371	0.0603274	0.141032	0.136067	0.0836176	0.0764746	0.173857	0.152794	0.105088	0.132013	0.141134	0.122104	0.0807652	0.0845648	0.134709	0.14335	491.074	38.13	15	22	528.301	41.25	16	24	1569.07	78.44	37	77		0			1508.98	78.44	36	72	1044	78.13	34	54		0
IPI00790633.1	25 kDa protein	94.95	19	10	10	58	0	0	0.00465286	0.00461325	0	0.00057805	0	0	0	0	0.00186871	0.00213557	0.000233937	0	0	0									364.494	94.95	10	20	254.005	94.95	9	17						0
IPI00419585.9;10863927	Peptidyl-prolyl cis-trans isomerase A	87.27	45	16	16	99	0	0	0.00882723	0.00967614	0.000808558	0.00104433	0.00815197	0.00831626	0	0	0.00195765	0.00178706	0.000473968	0.000541203	0.00114466	0.00132215									293.45	74.55	13	19	269.344	58.18	13	17	111.813	27.88	4	4		0			245.841	39.39	8
IPI00221222.7;197098442	Activated RNA polymerase II transcriptional coactivator p15	86.61	13	29	29	349	0.0221103	0.0221005	0.00132359	0.00149084	0.0104912	0.0118593	0.000425672	0.000442146	0.0131882	0.01243	0.00058985	0.00079161	0.00888103	0.0113712	0.000325796	0.000282268	643.755	62.99	17	26	666.46	56.69	18	28	194.928	51.97	8	10	154.005	40.94	7	9	858.033	85.04	20	29	627.7	77.95	17	27		0
IPI00179700.3;22208967	Isoform HMG-I of High mobility group protein HMG-I/HMG-Y	85.05	6	5	20	286	0.00995759	0.0104425	0.0050432	0.00516615	0.00467049	0.00557685	0.00334465	0.00532663	0.0053237	0.00559495	0.000487389	0.000747197	0.000986037	0.000728547	0	0.000175674	245.529	62.62	7	10	235.367	62.62	5	9	205.734	57.01	3	8	130.648	57.01	3	5	232.127	57.01	3	8	145.588	57.01	3	6	159.894	57.01	3
133212	RecName: Full=Ribonuclease pancreatic; AltName: Full=RNase 1; AltName: Full=RNase A	84.68	1	3	9	49	0	0	0	0	0	0	0.00287644	0.00341536	0	0	0	0	0	0	0.0210261	0.0206562																										0
157830431	Chain A, Crevice-Forming Mutants Of Bpti: Crystal Structures Of F22a, Y23a, N43g, And F45a	84.48	10	6	7	97	0	0	0	0	0	0	0.0123418	0.0142046	0	0	0	0	0	0	0.00968933	0.00856273																									246.207	75.86	4
IPI00396378.3;14043072	Isoform B1 of Heterogeneous nuclear ribonucleoproteins A2/B1	83.29	6	48	52	1209	0.209225	0.17824	0.0336405	0.0209168	0.045042	0.0480047	0.0330688	0.0310798	0.147325	0.128448	0.0225049	0.0238204	0.0870295	0.0800441	0.0436986	0.0422536	576.653	39.66	18	37	655.776	37.39	19	35	1356.48	62.89	33	63	1178.28	70.25	33	57	1863.59	64.87	33	77	1258.87	63.74	34	67	944.927	41.08	10
109157425	Chain B, Crystal Structure Of Sumo-3-Modified Thymine-Dna Glycosylase	82.8	97	7	7	25	0	0	0	0	0	0	0.00681287	0.00444986	0	0	0	0	0	0	0.0013216	0.00123566																										0
IPI00045498.4;15010818	Isoform 3 of Heterogeneous nuclear ribonucleoprotein D-like	82.38	6	34	51	884	0.00400892	0.00413337	0.0555323	0.0639774	0.0351809	0.0381965	0.0239593	0.0239876	0.0151892	0.0141458	0.0625553	0.0710289	0.0341964	0.0437724	0.0489175	0.0467879		0			102.868	18.85	5	6	1524.08	63.93	32	68	1338.75	61.89	33	69	1227.64	66.8	29	58	644.471	57.38	21	37	944.955	45.08	13
IPI00219147.4;224586884	Isoform 2 of DNA-binding protein A	82.18	5	9	20	157	0.00333198	0.0027038	0.000457587	0.000448393	0.00701695	0.00814105	0	4.27192e-05	0.00568441	0.00549546	0.000650463	0.000579728	0.00791765	0.00997844	0.000197734	0.000101435		0				0			114.604	28.71	4	4		0			472.973	76.57	14	18	350.413	49.5	10	14		0
IPI00017448.1;4506699	40S ribosomal protein S21	79.52	25	8	8	53	0	0	0.000159075	0.000150609	0.000290306	0.000460591	0.000455162	0.000484432	0	0	0.000197335	0.000117927	0.000215792	0.000273817	0.000281215	0.000286593									85.485	32.53	3	3	111.889	32.53	3	4	96.2373	43.37	3	4		0			163.786	45.78	5
IPI00479786.5;154355000	KH-type splicing regulatory protein	79.32	6	59	67	1343	0.0198097	0.0193568	0.0381614	0.0429159	0.0369039	0.041328	0.0413847	0.0447325	0.0364322	0.0288226	0.038735	0.0345847	0.029759	0.0355132	0.0471279	0.0462336	289.89	25.6	14	15	322.939	29.54	15	18	1926.99	62.73	42	80	1432.67	54.43	38	70	2028.27	60.48	39	72	1563.59	53.59	38	65	1409.6	42.48	27
IPI00031812.3;27807361	Nuclease-sensitive element-binding protein 1	79.32	51	14	25	204	0.0104823	0.00926764	0.000353682	0.000540095	0.0210167	0.0139673	1.34667e-05	0	0.00917246	0.00858085	0.00101105	0.000842575	0.0120626	0.0130449	0.00027288	6.48289e-05	168.674	23.46	4	6	280.332	33.33	7	10	163.773	17.28	3	3		0			582.755	56.17	13	19	415.646	60.8	12	16		0
IPI00177716.7	Isoform HMG-Y of High mobility group protein HMG-I/HMG-Y	79.17	1	3	18	207	0.0114748	0.00695101	0.00176604	0.00172913	0.00231587	0.00226286	0.000557386	0.00159738	0.0028014	0.00361552	0.000386702	0.000747197	0.000520248	0.000728547	0	0.000175674		0				0				0				0				0				0				0
IPI00215965.2	Isoform A1-B of Heterogeneous nuclear ribonucleoprotein A1	78.49	2	3	51	852	0.0985371	0.0603274	0.141032	0.136067	0.0836176	0.0764746	0	0	0.105088	0.132013	0.141134	0.122104	0.0807652	0.0845648	0	0	491.074	32.8	15	22	528.301	35.48	16	24	1569.07	67.47	37	77	1395.21	75.27	35	69	1508.98	67.47	36	72	1044	67.2	34	54
IPI00927677.1;123123581	34 kDa protein	78.3	21	37	51	571	0.0074296	0.0160252	0.0104224	0.00453472	0.0153279	0.0171386	0.00052663	0.000543377	0.0218899	0.0256502	0.0057694	0.00754208	0.0323968	0.0168341	0.0110257	0.0024856	281.458	24.21	7	8	298.215	32.08	10	11	408.712	43.71	18	27	386.968	46.86	20	24	881.613	57.55	29	52	739.762	60.06	31	45		0
IPI00005996.1	High mobility group protein HMGI-C	77.98	1	10	10	46	0	0	0	0	0	0	0	0	0	0	0	0	0	0	0	0
IPI00291608.4;9966827	Isoform 1 of PEST proteolytic signal-containing nuclear protein	76.97	28	15	15	78	0	0	0.00114881	0.0012433	0	0.000165693	0.000927798	0.000719657	0	0	0.00091241	0.000675678	0	0	0.000440574	0.000371901									266.401	53.37	9	12	153.05	60.11	10	11						0			152.263	34.83	7
IPI00411329.4	Putative uncharacterized protein HNRNPA1P4 (Fragment)	76.38	1	4	26	74	0.0145006	0.0208911	0.0192272	0.0242557	0.0164279	0.0145384	0	0	0.016156	0.015467	0.0316081	0.0177057	0.027618	0.0151438	0	0		0				0				0				0				0				0
IPI00375441.2;17402900	Isoform 1 of Far upstream element-binding protein 1	75.62	2	6	68	986	0.00994415	0.00930574	0.0343557	0.0395876	0.0348728	0.0378679	0.0398769	0.0439303	0.025141	0.0236047	0.0446508	0.0575021	0.0420216	0.0492704	0.0453006	0.044454	317.642	28.57	16	19	338.587	32.14	18	22	1598.27	62.58	40	81	1290.22	62.73	35	69	1955.33	66.93	43	76	1382.79	60.71	37	68		0
IPI00180954.4;4502847	Cold-inducible RNA-binding protein	75	6	17	17	182	0.00115872	0.000704745	0.00848223	0.00897015	0.00145627	0.00165254	0.000546287	0.000522105	0.00284583	0.0026294	0.00632115	0.00636857	0.0020597	0.00227642	0.00139367	0.00136253		0				0			244.492	41.86	7	11	260.237	36.63	7	11	165.883	28.49	5	8	119.002	20.35	4	6	102.396	23.84	3
194382840	unnamed protein product [Homo sapiens]	72.34	2	5	54	469	0	0	0	0	0	0	0.0398769	0.0439303	0	0	0	0	0	0	0.0453006	0.044454																									1498.58	54.05	27
IPI00217477.5	High mobility group protein B3	72	4	16	16	55	0.000835925	0.00231991	0.00120961	0.000791469	0.0023984	0.00188448	0.00035782	0.00043194	0.00184729	0.00158385	0.000279671	0.000174012	0.000541054	0.000641702	0	0		0				0			215.074	53.5	8	8	39.2464	20.5	3	3	295.538	46	10	13	130.051	39	6	8		0
IPI00024320.1;5803137	Putative RNA-binding protein 3	70.7	3	9	9	206	0.0079606	0.00383709	0.0210826	0.0214238	0.00646014	0.00369329	0.00158451	0.000864035	0.0031396	0.00315358	0.022506	0.0189735	0.00958551	0.00556434	0.026943	0.0257651		0				0			420.013	42.68	7	18	354.886	42.68	7	18	292.218	22.29	3	12	165.543	28.66	4	8	101.166	28.03	3
14043070	heterogeneous nuclear ribonucleoprotein A1 isoform b [Homo sapiens]	69.89	3	6	34	183	0	0	0	0	0	0	0.173857	0.152794	0	0	0	0	0	0	0.134709	0.14335																									713.173	39.78	14
IPI00220684.1;14110414	Isoform 3 of Heterogeneous nuclear ribonucleoprotein D0	68.3	31	6	48	670	0.0192257	0.0209772	0.0698008	0.071351	0.0929797	0.0892445	0.0144459	0.0158213	0.0496011	0.0462955	0.0787142	0.0921838	0.100678	0.0989538	0.0128188	0.0113136	181.398	31.05	12	14	268.808	27.78	12	14	1052.54	62.09	33	54	935.006	62.09	34	52	1158.31	65.03	32	61	878.237	61.76	29	51	280.792	26.8	7
IPI00334713.1;55956921	Isoform 3 of Heterogeneous nuclear ribonucleoprotein A/B	68.07	17	46	48	752	0.0114699	0.00991749	0.032194	0.0378844	0.0209922	0.0245276	0.00647907	0.00778516	0.0148409	0.0155966	0.0543096	0.0637324	0.0273913	0.0349858	0.00757929	0.00626325	168.582	15.44	7	9	189.886	20	6	6	1169.46	52.98	30	66	836.634	52.98	29	53	957.946	51.93	24	49	679.852	52.28	24	42	347.622	26.32	8
IPI00853059.2	Isoform 2 of Far upstream element-binding protein 1	68.04	1	1	55	711	0.00994415	0.00930574	0.0349481	0.0387486	0.0355965	0.0395706	0	0	0.0272507	0.0248902	0.0432697	0.0572133	0.0420216	0.0492912	0	0		0				0			1559.44	57.8	40	77	1276.69	57.95	35	68	1939.77	62.08	43	76	1323.47	55.96	38	65
IPI00419258.4	High mobility group protein B1	67.91	3	20	28	295	0.00355368	0.00220353	0.00457329	0.00493601	0.0158145	0.0195104	0.000213988	0	0.00388763	0.00359492	0.000882162	0.000873264	0.00647685	0.00440625	5.64602e-05	0.000304633	97.6721	20.93	4	5	112.346	25.12	6	9	447.073	57.67	16	27	459.604	53.49	17	25	919.563	64.19	22	39	786.91	64.19	25	45		0
10121038	Chain A, Crystal Structure Of The Ala4aib Mutation In Rnase S	66.67	1	1	3	6	0	0	0	0	0	0	0.011563	0.00966842	0	0	0	0	0	0	0.00545327	0.00648686																										0
433344;IPI00903278.1	p37 AUF1 [Homo sapiens]	66.43	33	4	46	144	0.0189968	0.0209772	0.0698008	0.071351	0.0929797	0.0892445	0.0144459	0.0158213	0.0496011	0.0462955	0.0787142	0.0921838	0.100678	0.0989538	0.0128188	0.0113136		0				0				0				0				0				0			280.792	28.67	7
15680098	Unknown (protein for IMAGE:4045143) [Homo sapiens]	64.38	26	4	4	10	0	0	0	0	0	0	0.000204573	0.000247811	0	0	0	0	0	0	0.000102418	6.44567e-05																										0
IPI00843996.1;224084730	Splicing factor, arginine/serine-rich 3, isoform CRA_a	63.71	14	9	9	62	0.00751596	0.0061092	0.000724855	0.000893785	0.00494503	0.00555748	0	0	0.00260019	0.00372412	0.000597477	0.00069856	0.00226322	0.0026003	0.000889275	0.0010113		0				0			45.3789	24.19	3	4	41.1708	24.19	3	3	261.865	63.71	8	15	159.807	40.32	5	12
IPI00790634.2;219803946	Isoform 2 of Partner of Y14 and mago	63.55	5	2	14	116	0.00147969	0.00147293	0.000510026	0.000405724	0.000568558	0.000470323	0.000310835	0.000333222	0.00155833	0.00251747	0.000221781	0.00023614	0.000331597	0.000278904	1.96354e-05	0.000167682	176.453	28.57	5	5	204.034	28.57	6	7	181.374	35.96	6	6	100.875	33.99	4	4	153.322	21.67	3	4	155.547	21.67	3	4	179.816	30.05	4
IPI00293434.2;149999611	Signal recognition particle 14 kDa protein	63.24	1	11	11	61	0.00650546	0.00556613	0.0018241	0.00108556	0.00361107	0.00142886	0.00069737	0.00128216	0.00118624	0.00381845	0.00113141	0.000425414	0.0015118	0.00172524	0.000149433	0.000142642	69.0679	37.5	3	4	52.8105	40.44	4	5		0				0			104.389	44.12	3	5		0				0
133197	RecName: Full=Ribonuclease pancreatic; AltName: Full=RNase 1; AltName: Full=RNase A	61.29	2	2	7	25	0	0	0	0	0	0	0.00634688	0.00412025	0	0	0	0	0	0	0.012513	0.0129613																										0
IPI00876879.1	cAMP responsive element modulator isoform g	61.11	1	3	4	4	0	0	0	0	0.000541229	0	0	0	5.08054e-05	4.91543e-05	0.000263244	0	0.000167769	0	0	0																	82.8144	61.11	4	4
IPI00646304.4	Peptidyl-prolyl cis-trans isomerase B	60.19	2	13	13	67	0	0.000624092	0.000884148	0.00127525	0.000772609	0.000972034	0.000731491	0.000775334	0.00068952	0.000929155	0.000433329	0.000513572	0.000708409	0.000710751	0	0						0			202.66	41.67	7	7	202.922	47.22	8	9	45.8785	22.22	4	4	123.669	31.48	6	6		0
IPI00217950.5	Non-histone chromosomal protein HMG-17	60	1	3	4	6	0.0369095	0.126777	0.016919	0.00926744	0.00249134	0.00241948	0.0129268	0	0.0126526	0.00703738	0.00196935	0.00226894	0.00166497	0	0.000454957	0.000507014		0				0				0				0				0				0				0
IPI00220327.4;119395750	Keratin, type II cytoskeletal 1	59.32	5	39	43	457	0.00871288	0.00299772	0.00563355	0.00555797	0.0178474	0.0205291	0.00511268	0.00404262	0.0235332	0.0224953	0.00806877	0.00768937	0.00871896	0.00896014	0.00198628	0.00188474	188.563	13.82	9	9	242.06	12.58	8	8	452.628	20.03	14	18	458.552	19.1	15	16	824.1	30.12	22	29	611.027	23.91	19	23	491.219	21.27	12
IPI00442073.5	Cysteine and glycine-rich protein 1	58.55	1	9	9	25	0	0	0.00240022	0.0026317	0.000389324	0.00278624	0.0018315	0.00188158	0	0	0.000643922	0.00108075	0.000189394	0.000219615	0.000549667	0.000565161									254.87	48.19	7	9	168.17	44.56	6	7	174.279	26.42	3	5		0				0
IPI00012340.1	Splicing factor, arginine/serine-rich 9	58.37	1	14	15	72	0	0	0.000164724	0	0.000394837	0.000502953	0	0	0.000498103	0.00045499	0.000569998	0.000652773	0.000811066	0.000751695	0	0										0							97.7461	48.42	11	11	67.7412	22.62	5	6
IPI00305092.7;14150139	Isoform 1 of Partner of Y14 and mago	57.84	5	1	13	106	0.00147969	0.00147293	0.000510026	0.000400282	0.000568558	0.000470323	0.000310835	0.000333222	0.00155833	0.00251747	0.000221781	0.00023614	0.000331597	0.000278904	1.96354e-05	4.0039e-05	176.453	28.43	5	5	204.034	28.43	6	7		0				0			153.322	21.57	3	4	155.547	21.57	3	4	179.816	29.9	4
IPI00430813.3;77735399	Isoform 2 of Cellular nucleic acid-binding protein	57.65	9	9	9	19	0	0	0.00055884	0.000552754	0.000106412	0	4.51805e-05	5.2831e-05	0	0	0.000303021	0.000153957	9.66186e-05	0	0	0									77.421	30	4	4	93.7807	33.53	5	6		0								0
224049401	PREDICTED: heterogeneous nuclear ribonucleoprotein D isoform 2 [Taeniopygia guttata]	57.62	6	2	27	118	0	0	0	0	0	0	0.0144459	0.0158213	0	0	0	0	0	0	0.0128188	0.0113136																									280.792	30.48	7
IPI00719622.1	40S ribosomal protein S28	56.52	1	5	5	9	0	0	0.000239912	0.000264361	0.000441928	0.000148484	0	0	0.000442951	0.000471219	0.000305519	0.000294729	0.000231448	0.000131964	0	0										0				0				0				0
IPI00019359.4	Keratin, type I cytoskeletal 9	56.5	1	18	30	263	0.00873838	0.00817998	0.0025079	0.0033037	0.0125908	0.00950442	0	0.000136534	0.00766452	0.00734717	0.00400839	0.00552838	0.00360995	0.00310839	0.000219956	0.000212326	103.758	8.67	5	5	102.514	6.42	3	3	292.389	28.25	10	14	231.048	23.43	11	15	625.493	38.04	18	28	471.585	29.86	12	19		0
IPI00014938.3;32129199	SAP domain-containing ribonucleoprotein	55.71	18	15	15	99	0.00029065	0	0.00271543	0.00293369	0.000586753	0.000445909	0.000789597	0.000951462	0.000217019	0.000222759	0.00156604	0.00150296	0.000336483	0.000274123	0.000431903	0.000481422		0							207.228	38.57	9	11	198.887	38.1	8	10		0				0			144.64	26.19	5
IPI00219097.4	High mobility group protein B2	54.07	1	16	24	254	0.00285947	0.0033429	0.00403136	0.00414719	0.0176451	0.0207953	0	0	0.00498201	0.00451741	0.000728367	0.000417752	0.00663187	0.0053572	5.64602e-05	0.000319512		0				0			282.614	26.32	8	13	300.38	41.63	13	18	950.594	54.07	22	40	690.491	46.89	21	41
IPI00607796.1;119606043	Putative uncharacterized protein HN1L	53.54	8	5	5	11	0	0	0.000796743	0.000907651	0	0	0.000346848	0.000518109	0	0	0.000149102	0	8.04921e-05	0	0	0									117.583	35.43	3	3	77.001	41.73	4	4										0
IPI00894485.1	Putative uncharacterized protein SERF2	53.33	2	5	5	10	0.00158182	0.00361549	0	0	0	0	0	0	0.000240797	0.000128187	0	0	0	0	0	0	79.6279	48.89	3	4	89.3123	53.33	5	6
IPI00003865.1;5729877	Isoform 1 of Heat shock cognate 71 kDa protein	53.1	45	28	35	258	0	0	0.00471715	0.00490723	0.00071533	0.000980022	0.00110327	0.00137848	0.000374589	0.000326843	0.00632251	0.00558842	0.00120022	0.00132443	0.000564916	0.000568501									617.292	39.63	26	31	547.055	36.07	22	28	117.052	8.05	4	5	79.5659	5.57	3	3	193.391	13.47	5
IPI00643781.1;71052048	PSIP1 protein	52.89	42	14	22	199	0.0133191	0.0128624	0.00116024	0.000875723	0.00510983	0.00480701	0.000129755	0.000313222	0.00565731	0.00495255	0.000320941	0.000393665	0.00202953	0.00189655	0.000265389	0.000280464	158.692	25.53	7	9	174.463	23.1	8	11	108.71	17.93	5	7	93.6437	18.24	6	6	393.276	27.96	14	20	278.412	36.17	14	17		0
IPI00169383.3;4505763	Phosphoglycerate kinase 1	52.52	11	19	19	78	0	0	0.00276626	0.00289487	0.000298864	0.000198818	0.00133247	0.00141807	0	6.72163e-05	0.000478484	0.000541856	0.000218969	0.000241466	0.000185868	0.00018553									459.627	37.65	12	18	383.117	47.48	15	19	106.645	10.31	3	3	58.2215	10.31	3	3	180.786	17.75	5
IPI00165230.1;25470886	Isoform 1 of DAZ-associated protein 1	50.61	7	25	25	411	0.0200383	0.0290367	0.0657522	0.0665036	0.0203141	0.0206652	0.0219058	0.0342015	0.0265106	0.0187468	0.0531035	0.0497673	0.0217619	0.0244122	0.0140025	0.0284566	167.664	10.07	6	9	177.372	12.53	6	10	699.631	40.29	18	30	455.886	39.56	17	26	488.749	33.66	11	19	322.984	19.16	8	13	349.265	15.97	6
IPI00009032.1;10835067	Lupus La protein	50.25	3	26	26	96	0.000228522	0	0.000528754	0.000541836	0.000121867	0	0	0.000738803	0.000509156	0.000569036	0.00211684	0.00188084	0.00050457	0.000427433	0.000734045	0.000695012		0							136.907	6.37	3	3	102.399	7.84	4	4		0
IPI00021570.1	Isoform 1 of Endothelial differentiation-related factor 1	50	3	8	8	53	0.00214213	0.0017732	0.000290681	0.000359022	0.000636572	0.000788641	0.00155458	0.00169153	0.000949259	0.000905338	8.30304e-05	9.52767e-05	0.000380828	0.000389105	0.000111013	0.000114027	102.411	25	4	6	70.7871	15.54	3	4	80.028	25	3	3		0			113.567	41.22	6	6	137.165	43.24	6	7		0
114556250	PREDICTED: similar to proliferation associated gene (pag) isoform 1 [Pan troglodytes]	50	11	5	5	5	0	0	0	0	0	0	0	0	0	0	0	0	0	0	0.000109294	8.04351e-05
IPI00219018.7	Glyceraldehyde-3-phosphate dehydrogenase	48.96	3	14	15	120	0	0.000205126	0.00356231	0.00383016	0.00443188	0.00381367	0.0002676	0.000194346	0.000538037	0.00102767	0.00128759	0.00108099	0.00277878	0.00229921	8.75348e-05	7.44306e-05						0			343.617	37.01	9	12	271.909	31.04	9	10	341.77	31.34	8	10	162.482	31.94	7	7		0
IPI00642816.2	Signal recognition particle 9 kDa protein	48.84	3	5	5	11	0	0.000233849	0.00149992	0.0017285	0.00171484	0.00154996	0.000975627	0.000513387	0.000517398	0.000716064	0.000881531	0.00101243	0.000694972	0.00113129	0.000560838	0.000557306						0				0				0				0				0				0
IPI00014263.1	Isoform Long of Eukaryotic translation initiation factor 4H	48.39	1	15	15	104	0.00771788	0.00583139	0.00128865	0.00169248	0.00247385	0.0027602	0.00084697	0.000805587	0.00515923	0.00417933	0.000701217	0.00062371	0.00251808	0.00367143	0.000463669	0.000484282		0			55.7515	22.98	6	7	163.282	32.26	6	8	133.789	19.35	5	7	234.45	45.16	11	14	142.671	38.31	10	11		0
IPI00009865.3	Keratin, type I cytoskeletal 10	47.6	3	9	29	257	0.00159102	0.00181834	0.00246649	0.00271836	0.00366432	0.00316274	0	0	0.00407703	0.00273353	0.00385567	0.00351797	0.00380049	0.00449657	0	0	164.942	9.08	4	4	216.635	11.82	6	6	387.201	27.57	16	18	321.869	21.23	14	14	439.899	16.1	10	13	295.941	21.06	12	12
IPI00386120.3;295842307	Isoform 6 of Splicing factor 1	47.46	37	18	38	625	0.0284787	0.0255402	0.0293083	0.0208871	0.0389063	0.0314066	0.0302895	0.0332149	0.0271273	0.027049	0.0293714	0.0264846	0.0341027	0.0292889	0.0226945	0.0198306	156.2	8.93	6	9	159.486	16.81	9	11	828.085	33.45	23	41	673.038	33.63	20	35	999.385	36.6	26	49	559.323	33.27	19	35	428.932	18.91	10
47132620	keratin, type II cytoskeletal 2 epidermal [Homo sapiens]	47.1	4	6	26	85	0	0	0	0	0	0	0.00222157	0.00128601	0	0	0	0	0	0	0.00404388	0.00412205																									258.402	18.47	11
IPI00021304.1;181402	Keratin, type II cytoskeletal 2 epidermal	46.98	4	10	31	269	0.00448924	0.00431375	0.00225748	0.00252841	0.00390505	0.00432098	0.00222157	0.00128601	0.00623623	0.00580799	0.00472948	0.0052755	0.0028514	0.00317261	0.00404388	0.00412205	104.81	11.63	5	5	205.778	13.8	6	6	446.566	24.96	14	16	386.908	23.41	12	13	322.923	21.86	12	12	288.373	14.73	7	9	258.402	18.29	11
IPI00006378.3	Coiled-coil domain-containing protein 72	46.88	1	5	5	28	0.00286969	0.00227842	0.000653176	0.000542458	0.00111601	0.00134158	0	0.0003195	0.00216455	0.00138951	0	0	0.000280768	0.000370049	0	0		0			55.0605	40.63	3	5	97.7729	46.88	4	6	79.7244	40.63	4	5	105.055	40.63	4	5	112.185	40.63	3	4
IPI00386621.2	CALM3 protein	46.62	3	5	5	7	0	0	0.000188717	0.000202367	0.000353453	0	0	0	0	0	0.00020078	0.000408079	0	0.000228768	0	0									58.9596	24.32	3	3		0				0
IPI00377261.1;100816392	Isoform 1 of Far upstream element-binding protein 3	46.5	8	16	22	168	0.00139358	0.00111104	0.00502408	0.00585761	0.00407243	0.00489377	0.000762969	0.00153234	0.00316898	0.00337015	0.00793715	0.00767666	0.00524333	0.00551407	0.00234737	0.00186231		0				0				0				0				0			119.787	10.31	6	7	112.49	7.34	4
IPI00604620.3;55956788	Nucleolin	45.92	9	46	46	285	0.0024606	0.00252631	0.00151584	0.0017128	0.0107605	0.00803726	7.3251e-05	5.38932e-05	0.00517448	0.00789976	0.00210169	0.0021656	0.0163997	0.0128146	0.000542649	0.000235877	116.276	10.99	8	8	95.2576	14.65	11	12	220.448	11.41	9	10	199.282	10.42	9	11	488.145	15.77	13	20	357.617	13.66	13	18		0
IPI00027834.3;52632383	Heterogeneous nuclear ribonucleoprotein L	44.65	16	16	22	133	0.00172241	0.00210179	0.000517602	0.000581843	0.00170766	0.00206954	0.00171003	0.00193803	0.00360631	0.00453003	0.00273083	0.00275352	0.00278473	0.00261776	6.99179e-05	0.000119508	44.0739	3.4	3	3	85.2306	5.26	3	3	95.6602	9.34	4	4	110.915	14.09	6	6	200.678	20.88	8	11	137.296	13.24	7	9		0
IPI00215884.4;5902076	Isoform ASF-1 of Splicing factor, arginine/serine-rich 1	43.95	22	11	12	59	0	0	0.000162559	0.000237941	0.000248671	0.000302773	0	0	0.000451751	0.000705068	0.000905518	0.000956491	0.000633721	0.000540917	0.00017443	0.000250304										0			53.4488	14.52	3	3	71.8986	21.37	5	6		0
38327502	CArG binding factor [Homo sapiens]	43.62	1	3	18	22	0	0	0	0	0	0	0.0223236	0.022282	0	0	0	0	0	0	0.0489175	0.0465526																										0
IPI00796848.1	cDNA FLJ52570, highly similar to Splicing factor, arginine/serine-rich 2	43.06	3	13	13	101	0.00189157	0.00274307	0	0	0.00438511	0.00426403	0	0	0.0038265	0.003488	0.00033439	0.000255539	0.00648094	0.0056484	0	3.73088e-05	58.848	19.62	3	4		0											378.036	33.01	8	14	264.063	25.36	5	7
IPI00215911.3;18375501	DNA-(apurinic or apyrimidinic site) lyase	42.77	10	21	21	300	0.0391444	0.0422628	0.0119626	0.00549362	0.0104392	0.0154083	0.00713984	0.00800606	0.0235637	0.021198	0.00264866	0.00173367	0.0052454	0.0057789	0.000895817	0.00073698	187.608	18.55	7	10	322.667	19.18	11	15	407.854	41.51	15	21	291.066	41.51	15	19	368.587	31.13	12	16	247.722	26.73	9	13	219.468	11.64	4
114667513	PREDICTED: similar to keratin 10 isoform 2 [Pan troglodytes]	42.73	10	4	22	95	0	0	0	0	0	0	0.001105	0.00200147	0	0	0	0	0	0	0.00284321	0.00261562																									485.032	26.03	13
IPI00465439.5;4557305	Fructose-bisphosphate aldolase A	42.58	33	15	15	105	0	0.000789648	0.00242918	0.00295158	0.000822751	0.000815677	0.00042645	0.000455045	0.000515119	0.000428882	0.000431051	0.000546114	0.00068389	0.000825666	0.000169404	0.000182881						0			289.006	26.92	9	10	221.841	32.14	11	11	212.159	18.68	7	7	139.443	23.9	8	8	153.44	12.09	4
IPI00217963.3	Keratin, type I cytoskeletal 16	42.07	1	9	18	61	0.00181184	0.00119364	0.000941174	0.000727112	0.000781972	0.00102688	0.000643367	0.000521548	0.00181401	0.00168573	0.00143269	0.00129734	0.00182331	0.00192223	0.000671483	0.000207675		0				0				0				0				0			208.107	15.43	7	7		0
IPI00031526.3;13128992	Uncharacterized protein C19orf43	42.05	3	13	13	36	0	0	0.000683449	0.000806532	0.00130943	0.0013831	0.00017179	0.000159378	0.00128122	0.00106153	0.000623001	0.000444972	0.000498889	0.000685851	0.000269066	0.000142061									113.39	23.86	4	5	121.563	38.07	6	7		0				0				0
IPI00020956.1;4758516	Hepatoma-derived growth factor	40.42	22	11	13	84	0.000759468	0.000501652	0.00146372	0.00164666	0.00250558	0.0023996	0.00024497	0.000284307	0.000460406	0.000409072	0.000173701	0.000345451	0.000971963	0.00105204	0	2.03026e-05		0			65.1104	11.67	3	3	251.592	40.42	10	12	209.233	24.58	9	10	320.591	35.42	10	14	225.144	24.58	8	11	102.363	11.25	3
296218972	PREDICTED: U6 snRNA-associated Sm-like protein LSm3-like [Callithrix jacchus]	40.2	3	3	3	5	0	0	0	0	0	0	7.64262e-05	0	0	0	0	0	0	0	0.000269178	0.000256443																										0
IPI00219365.3;4505257	Moesin	39.86	14	20	28	162	0.0013942	0.00157984	0.00325574	0.00317297	0.000804617	0.00124036	0.00132931	0.00232666	0.00116666	0.00141977	0.0008166	0.000772587	0.000570013	0.000920542	0.000355236	0.000361833	58.3557	4.33	3	4	86.8573	7.8	5	6	531.154	36.74	23	27	660.953	32.41	24	29	195.215	16.46	9	9	129.427	11.96	7	8		0
IPI00013881.6;5031753	Heterogeneous nuclear ribonucleoprotein H	39.64	15	17	17	138	0	0	0.000127276	0.000148695	0.000841643	0.00078839	0.000199446	0.000240604	0	0	0.000584185	0.000445508	0.000276717	0.000202505	0.000387993	0.000414957									84.9806	6.9	3	3		0			139.163	13.14	6	6	121.872	14.03	5	5		0
IPI00293665.9;119703753	Keratin, type II cytoskeletal 6B	39.36	8	4	26	115	0.0019869	0.00185678	0.000824675	0.00220852	0.00224415	0.00275613	0.00119174	0.00114368	0.00272198	0.00251213	0.00264145	0.00272874	0.00176273	0.000977966	0.000751824	0.00020203	107.356	9.57	5	5		0				0				0			297.836	24.11	13	13		0			181.167	12.41	6
IPI00554761.2;48255933	Non-histone chromosomal protein HMG-14	39	13	8	8	81	0.0065857	0.00706684	0.00736577	0.0102454	0.000601023	0.00021572	0.00865573	0.00385398	0.00108824	0.000992868	0.00300181	0.00169776	0	0	0.000102144	0.0013784	92.2122	31	5	5	133.742	31	5	7	164.307	32	5	9	166.286	32	6	9		0				0				0
IPI00549248.4	Isoform 1 of Nucleophosmin	38.78	3	15	15	142	0.0141113	0.0123791	0.000113489	0	0.0109938	0.0121238	0	0	0.00888969	0.00860415	0	0	0.00260421	0.00281223	0	0	151.761	16.67	8	10	159.734	18.71	7	10		0				0			438.266	18.71	11	25	329.579	18.71	11	19
IPI00014197.2	Isoform 1 of Protein CDV3 homolog	38.76	2	7	7	9	0	0	0.00111261	0.00061778	0.000464591	0	0.000570385	0.000357951	0	0	0.000363102	0	0.000455505	0	0	0									75.4098	38.76	6	6	66.4059	15.89	3	3		0								0
133210	RecName: Full=Ribonuclease pancreatic; AltName: Full=RNase 1; AltName: Full=RNase A	38.71	1	2	4	8	0	0	0	0	0	0	0.000764292	0.00113714	0	0	0	0	0	0	0.0135685	0.0128296																										0
194384578	unnamed protein product [Homo sapiens]	38.24	6	3	3	3	0	0	0	0	0	0	0.000125311	0	0	0	0	0	0	0	0	0																										0
IPI00304596.3;34932414	Non-POU domain-containing octamer-binding protein	38.22	20	16	16	155	0.00309664	0.00327421	0.00107308	0.00114361	0.00130762	0.000891654	0.000452884	0.00070289	0.00110506	0.000939917	0.000859626	0.000744062	0.0013538	0.000888843	0.000445156	0.000340216		0				0			166.235	12.74	4	5	188.392	18.68	6	7	258.667	22.51	9	11	131.395	17.62	6	7	263.078	13.16	4
IPI00930205.1;228008293	synaptotagmin binding, cytoplasmic RNA interacting protein isoform 5	38.15	19	13	18	106	0.00500902	0.000597216	0.000679766	0.000919236	0.00225386	0.00164526	0.00237638	0.00245236	0.00153777	0.00155726	0.00229163	0.0022462	0.00203848	0.00240398	0.00109308	0.00190952		0				0			101.86	4.1	3	3	82.5257	4.1	3	3		0			77.3548	4.1	3	3		0
IPI00909059.3;194387918	cDNA FLJ53910, highly similar to Keratin, type II cytoskeletal 6A	38.13	9	4	23	78	0.00141191	0.000901932	0.00085886	0.000917297	0.00116323	0.00131047	0.000460058	0.000466556	0.00157413	0.00132209	0.00131903	0.00137118	0.000792671	0.000977966	0.000751824	0.00020203		0				0			165.179	12.52	7	7		0			299.551	22.62	11	11	217.431	16.64	8	9		0
IPI00029631.1	Enhancer of rudimentary homolog	37.5	1	4	4	8	0	0	0.000647127	0.00136372	0	0.000907208	0	0	0	0	0.000415627	0.000553797	0.00156128	0.00109645	0	0										0			47.3063	31.73	3	4						0
IPI00013297.1	28 kDa heat- and acid-stable phosphoprotein	36.46	1	12	12	36	0	0.000143756	0.000734914	0.000497415	0.000651687	0.00104991	0	0	0.000230964	0.000564977	0.000224622	0.000209474	0.000627595	0.000412163	4.24849e-05	0						0			101.734	29.28	4	4	56.3012	16.02	3	3	156.935	32.04	10	10		0
IPI00940851.1;38201714	ELAV-like protein 1	36.2	19	11	11	47	0	0	0	0.000212022	0.000507657	0.000704264	0.00068358	0.000811336	0.000140637	0.000299201	0.000854518	0.000946612	0.000570825	0.000685519	7.62023e-05	0.000156412														0				0				0				0
IPI00926376.1	TatD DNase domain containing 3 isoform 3	35.42	5	7	7	16	0	0	0.000791184	0.000736861	0	0	0	0	0	0	0.000195813	0.000294981	0	0	0	0									71.1346	27.5	6	7	56.4775	27.08	5	5
IPI00027798.1;13899289	Protein FAM103A1	34.75	1	5	5	32	0	0	0.000402273	0.000539925	0.00023416	0.000180133	0.00105226	0.000649033	0	0	0.000410273	0.000264722	0.000266245	0.000233186	0.000473087	0.00042427									84.7839	21.19	3	4	54.379	33.9	3	3	98.1002	21.19	3	4		0				0
IPI00383296.5;157412270	Isoform 2 of Heterogeneous nuclear ribonucleoprotein M	34.73	38	6	20	83	0	0	0.000179242	0.000200911	0.000160862	0	0.000498165	0.00055109	0	0	0.000604028	0.000558241	0.000177039	0.00012337	0.00014575	0.000204837									134.765	9.41	5	5	94.0811	6.08	3	3		0				0			111.34	7.81	4
IPI00009867.3;119395754	Keratin, type II cytoskeletal 5	34.58	4	16	24	133	0.00189823	0.00212075	0.000524798	0.000720987	0.00195404	0.00180554	0.000847816	0.000927378	0.00227056	0.00230784	0.000900155	0.000895704	0.000988512	0.000776577	0.00111998	0.000567637	73.2873	9.83	5	5	130.11	11.53	6	6		0				0			212.191	17.97	11	11	168.768	14.75	7	8		0
IPI00470497.3;66346681	Isoform 2 of Plasminogen activator inhibitor 1 RNA-binding protein	34.08	33	14	14	107	0.00145392	0.00570635	0.00050525	0.000808054	0.00206565	0.0016097	0.00198565	0.00125693	0.00203362	0.00203135	0.00331226	0.000447813	0.0011737	0.000808076	0.000171044	0.000154037	90.2834	9.2	3	3	89.0237	8.21	3	3	54.3442	8.96	3	4	71.3353	17.41	6	6	158.063	24.13	8	8	79.8558	17.16	6	6	197.178	13.18	4
IPI00883857.2	Isoform Long of Heterogeneous nuclear ribonucleoprotein U	34.06	5	32	32	117	0.000122107	0.000129937	0.00116765	0.00126339	0.000294231	0	0	0	0.000129753	0.000261045	0.00302562	0.00307101	0.000182209	0.000320123	0.00026363	0.000272623		0				0			251.429	19.52	12	15	217.946	13.45	8	10	66.1714	4.85	4	4		0
IPI00922811.1	cDNA FLJ54222, highly similar to Glycylpeptide N-tetradecanoyltransferase 1	33.58	2	3	3	3	0.000381681	0.000262313	0.000906721	0.00103124	0.00116845	0.00151809	0.000886602	0.000925896	0.000583322	0.000754795	0.000433745	0.000346762	0.00100217	0.000887711	0.000237439	0.00015586		0				0				0				0			93.9972	33.58	3	3		0				0
IPI00940508.1	20 kDa protein	33.33	4	7	7	13	0	0	0	0	0	0	0	0	0	0	0	0	0	0	0	0
IPI00011913.1	Heterogeneous nuclear ribonucleoprotein A0	32.79	1	8	9	44	0.00403126	0.00235446	0.000637543	0.00163989	0.000805712	0.00165129	0	0	0.00271781	0.00242624	0.00223425	0.00114669	0.00172552	0.00197878	0	0		0				0				0				0			62.2998	12.46	3	3	106.52	8.52	3	5
3318722	Chain E, Leech-Derived Tryptase InhibitorTRYPSIN COMPLEX	32.74	1	8	8	61	0	0	0	0	0	0	0.037121	0.0411786	0	0	0	0	0	0	0.0186588	0.0184204																									202.853	17.04	4
IPI00414963.2;114652134	Isoform 2 of Polyadenylate-binding protein 2	32.43	12	7	7	40	0	0	0.000978518	0.000795975	0	0	0.00264464	0.0028619	0	0	0.00168177	0.000307686	0.000207644	0	0.00584819	0.00559872										0				0												0
45827706;IPI00514277.2	protein quaking isoform HQK-5 [Homo sapiens]	32.26	57	9	9	56	0	0	0	2.13117e-05	0.00133648	0.000655189	0.000350984	0.000396371	0.000189286	0	0.00016023	0.000596228	0.00135807	0.000677827	0.000391695	0.000324108														0				0				0			103.494	14.66	4
311247379	PREDICTED: splicing factor 1-like [Sus scrofa]	31.69	5	5	25	117	0	0	0	0	0	0	0.00298148	0.00313447	0	0	0	0	0	0	0.00703683	0.00406512																									263.812	17.85	10
7657015;IPI00550689.3	tRNA-splicing ligase RtcB homolog [Homo sapiens]	31.68	10	17	17	103	0	0	0.000282669	0.000503519	0.000275706	0.000256962	0.00190402	0.00127287	0.000143634	0.000149564	0.000376137	0.000139882	0.000282678	0	0.000797017	0.00071412										0				0				0				0			237.562	8.32	4
IPI00304692.1	Heterogeneous nuclear ribonucleoprotein G	31.46	1	14	24	271	0.0419495	0.046434	0.00044451	0.000487957	0.0203181	0.0208189	0	0	0.0385386	0.0340566	0.00041577	0.000360417	0.0218463	0.0206886	0	0.000100012	142.465	13.3	5	7	215.264	16.37	8	11	144.131	12.02	5	7	150.734	8.7	3	5	681.493	27.11	17	27	585.256	24.3	15	22
IPI00304925.5;167466173	Heat shock 70 kDa protein 1	31.36	30	13	15	61	0	0	0.00195492	0.00220388	0.000367671	0.000416124	0.000592447	0.000631717	0.000218837	0.000203414	0.00308374	0.00321592	0.000712613	0.000464186	0.000381747	0.000367995									172.292	12.48	6	6	141.396	12.17	6	6		0				0				0
IPI00909232.1	cDNA FLJ53542, highly similar to Heterogeneous nuclear ribonucleoproteins C	31.25	9	11	11	57	0	0	0.000365843	0.000105792	0.00162879	0.00693206	0	0	0.000159262	0.000120848	0.000142717	0.000123383	0.00127307	0.000338947	0	0						0				0				0			272.397	23.26	8	10	106.148	22.92	5	5
IPI00006980.1	UPF0568 protein C14orf166	31.15	2	6	6	9	0	0	0.000164417	0.000145607	0	0	0	0	0	0	0.00012708	0.000206092	3.40135e-05	0	0	0										0				0
119569098	high mobility group nucleosomal binding domain 3, isoform CRA_c [Homo sapiens]	30.65	22	3	3	3	0	0	0	0	0	0	0.00149862	0.0234113	0	0	0	0	0	0	0.00658851	0.000371771																										0
IPI00909208.1;194388148	cDNA FLJ58832, highly similar to Heterogeneous nuclear ribonucleoprotein A3	30.34	12	4	14	42	0.0074296	0.0160252	0.00484905	0.00453472	0.0153279	0.0171386	0.000870248	0.000673086	0.0218899	0.0256502	0.0057694	0.00546874	0.0161155	0.0168341	0.0111753	0.00320662	281.458	23.84	7	8		0				0				0				0				0			207.978	14.24	4
114675112	PREDICTED: heterogeneous nuclear ribonucleoprotein M isoform 17 [Pan troglodytes]	30.06	4	3	17	77	0	0	0	0	0	0	0.000498165	0.00055109	0	0	0	0	0	0	0.00014575	0.000204837																									111.34	7.58	4
IPI00220484.3	High mobility group nucleosome-binding domain-containing protein 4	30	1	2	3	7	0.000340562	0.000377491	0.0116587	0.0118002	0	0	0.0092058	0	0	0	0.00214993	0.00205345	0	0	0	0		0				0				0				0												0
IPI00641351.1	RNA binding protein, autoantigenic	29.83	5	5	5	32	0	0	0	0	0.000587742	0.000593308	0	0	0.000503277	0.00052942	0	0	0.000696636	0.000510397	0	0																	115.848	29.28	4	5	69.3881	29.28	4	4
IPI00299024.9	Isoform 1 of Brain acid soluble protein 1	29.52	1	3	3	3	0.00146688	0.00133448	0.000657819	0.001005	0.00256029	0.00262173	0.000589675	0.000660161	0.00159605	0.000939715	0.000464698	0.000376898	0.000877084	0.0018105	0	0		0				0				0				0				0				0				0
IPI00010740.1	Isoform Long of Splicing factor, proline- and glutamine-rich	29.28	1	24	24	114	0.00148404	0.00155764	0.000503813	0.000540324	0.00530257	0.00389179	0.00247368	0.00245934	0.00388327	0.000749568	0.000310858	0.000257228	0.00362597	0.00273893	0.000258113	0	45.3504	4.95	3	3	78.8088	6.36	4	5	61.2931	4.81	3	3	99.491	4.81	3	3	285.139	16.12	13	14	224.359	14.99	14	15		0
IPI00903145.1;4506467	Radixin	28.99	21	9	21	154	0.00240561	0.00284721	0.00220173	0.00247697	0.00106259	0.0015725	0.000143361	0.000105005	0.00173484	0.00183633	0.000808707	0.000761516	0.000596768	0.000962907	0.000154475	0.000181002	93.8141	5.15	5	5	133.28	13.04	8	9	330.785	23.67	14	19	436.606	25.04	16	21	251.003	16.47	10	11	180.932	13.72	8	10	149.988	5.83	3
IPI00909622.1;194373969	cDNA FLJ58787, highly similar to Cleavage stimulation factor 64 kDa subunit	28.93	10	6	12	53	0	0	0.00143632	0.00171146	0.00028389	0.000760097	0	0.00179859	0.000587918	0.000488033	0.00091233	0.000927022	0.000297665	0.000517237	8.41186e-05	0.000698172									183.706	20.07	8	8		0				0				0				0
25453472	elongation factor 1-delta isoform 2 [Homo sapiens]	28.83	7	6	6	10	0	0	0	0	0	0	0	0	0	0.0002778	0	0	0.000422536	0	0	0																		0
IPI00022402.3	Protein FAM32A	28.57	1	3	3	3	0.000223935	0.000233972	0	0	0.000280808	0	0	0	0.000161022	0	0	0	0	0	0	0		0				0												0
IPI00012382.3;4759156	U1 small nuclear ribonucleoprotein A	28.01	2	7	7	73	0	0	0.000537803	0.000471858	0.000505995	0	0.00234528	0.0020533	0	0	0.00156337	0.0011944	0.000801471	0.000537769	0.000648506	0.000850018									73.4416	13.12	3	3	72.146	13.12	3	4		0							240.506	15.25	3
IPI00843975.1	Ezrin	27.99	2	14	19	87	0	0.00148427	0.00210332	0.00248721	0.000462073	0.000898821	0.000176284	0	0.000784518	0.000765741	0.000654213	0.000594238	0.000280434	0.000621946	0	0						0			306.725	22.53	14	16	357.991	23.72	15	18	191.911	13.65	7	7	163.777	10.92	6	7		0
IPI00514561.1	Heterogeneous nuclear ribonucleoprotein K	27.57	7	12	12	74	0.000888754	0.00100682	6.38914e-05	0	0.000288525	0.000386519	0	0	0.000460676	0.000450099	0.000280593	0.000169193	0.000234225	0.000291074	0	0		0				0				0							111.04	9.11	4	8	98.7217	9.58	4	7
IPI00384444.6	Keratin, type I cytoskeletal 14	27.33	1	2	13	63	0.00181184	0.00112196	0.000941174	0.000727112	0.000964811	0.00128969	0.000496235	0.000574562	0.00141891	0.00135166	0.00143269	0.00129734	0.00182331	0.00192223	0.000712233	0.000240351		0				0			125.868	12.92	6	6	194.009	14.19	6	6	171.406	16.1	7	7		0				0
IPI00012011.6;5031635	Cofilin-1	27.11	15	5	5	36	0.000123521	0	0.000691979	0.000801977	0.000120752	0.000337744	0.000709995	0.000674254	8.46588e-05	7.54608e-05	0.000328452	0.000431761	8.48287e-05	0.000260761	0.000534026	0.000523467		0							115.875	27.11	5	5	93.3239	18.67	4	4		0				0			103.496	19.28	3
IPI00894365.2	cDNA FLJ52842, highly similar to Actin, cytoplasmic 1	27.07	5	5	5	7	0	0	0.000134891	0	0.000385163	0.000412703	0	4.13287e-05	0	0	8.83398e-05	9.45331e-05	0	0	0	0										0								0				0
226393	BPTI	27	1	3	4	6	0	0	0	0	0	0	0.0178753	0.0195532	0	0	0	0	0	0	0.0189409	0.0184661																										0
IPI00020991.2;8923040	CDKN2A interacting protein	26.9	5	12	12	96	0.000358977	0.000380497	0.000103559	0.000133043	0.000853993	0.000778646	0.000674742	0.000718697	0.000727046	0.000707043	0.000190286	0.00020454	0.00102924	0.000884161	0.000263635	0.000352872	79.5536	6.55	3	3	48.4738	8.79	3	3	64.5397	6.72	3	3	88.258	7.41	3	3	151.382	8.97	4	4	107.918	10.34	4	4	141.086	13.28	5
IPI00000861.1;5453710	Isoform 1 of LIM and SH3 domain protein 1	26.82	22	6	6	29	0	0	0.000607793	0.000438234	0.000318871	0.000475912	0.000331696	0.000374597	0.000225884	0.00020195	0.000126154	0.000133339	0.000223748	0.000333495	3.7599e-05	6.43146e-05									76.5915	20.31	4	4	73.1145	10.34	3	3	71.7478	16.09	3	3	50.6767	14.94	3	3	125.028	15.33	3
77695912;IPI00644708.1	nucleolysin TIAR isoform 2 [Homo sapiens]	26.79	19	13	13	71	0	0	0.000186128	0	0	0	0.000381296	0.000515506	0	0	0.000548605	0.000902804	0.000347546	0.000503332	0.000325161	0.000336969										0															101.533	8.16	3
62632771	DNA-3-methyladenine glycosylase isoform c [Homo sapiens]	26.69	7	4	4	4	0	0	0	0	0	0	0.00021235	0.000176393	0	0	0	4.56374e-05	0	0	0	0																										0
IPI00736859.1	Isoform 4 of Heterogeneous nuclear ribonucleoprotein U-like protein 1	26.46	4	20	20	122	0	0	0.00218287	0.00242293	0.00144816	0.00278278	0.000199655	0.00018607	0.000222846	0.000469102	0.00120586	0.00122748	0.00110799	0.00164089	0.000110303	0.000321373									266.688	19.97	13	15	231.035	18.39	12	13	298.476	20.24	12	13	237.704	17.59	12	13		0
148680534	eukaryotic translation initiation factor 5A, isoform CRA_e [Mus musculus]	26.4	12	3	3	8	0	0	0	0	0	0	0	0	0	0	0	0	0	0	0	0
IPI00607824.2	Isoform 5 of Polyglutamine-binding protein 1	26.06	4	3	3	3	0	0	0.000111296	0.000135876	6.22987e-05	0	0	0.000339971	0	0	0.000101201	0	0	0	0.000186678	0										0				0				0
IPI00909647.1;194385508	cDNA FLJ55159	25.44	4	6	6	9	0	0	0.000715111	0.000542576	0.00133802	0.00139044	0	0	0.000853546	0.000819698	0.000334432	0.000265729	0.000464276	0	0	0.000271162									61.1693	25	3	3		0				0				0
IPI00909890.1;194386744	cDNA FLJ58049, highly similar to RNA-binding protein FUS	25.41	37	8	11	112	0.00140137	0.00179008	0.000470262	0.000378428	0.00383863	0.00424795	0.000314028	0.000354978	0.000792049	0.00131588	0.000456016	0.000351338	0.00211417	0.00287327	7.05879e-05	3.68529e-05		0				0			94.9484	13.75	4	4	113.559	14.92	5	5	331.374	17.72	7	9	199.517	19.35	8	11		0
IPI00011726.1;4506589	Isoform 1 of RNA 3'-terminal phosphate cyclase	25.41	5	8	8	18	0	0	0.000168932	0.000171472	0	0	0	0	0	0	0.000117767	0.000191906	0	0	3.038e-05	0.00011964									73.5594	11.75	3	3	60.5091	10.11	3	3
IPI00060627.2;19923969	Coiled-coil domain-containing protein 124	25.11	3	7	7	31	0.00251293	0.00345149	0.000332298	0.000306988	0.000753816	0.000937195	0.000389187	0.0004108	0.00132298	0.000853316	0.000129966	0.000148105	0.000327949	0.00035304	0	0		0			69.6018	12.11	4	4		0			64.5306	14.35	3	4	101.493	14.35	3	4	62.9659	14.35	3	4		0
IPI00465044.2;29789090	Protein RCC2	24.71	2	11	11	104	0.00939073	0.00895539	0.00118555	0.00150955	0.00295866	0.00356424	0	0	0.0032356	0.00320121	0.000166617	0.000262508	0.000822422	0.00150805	3.90921e-05	0.000264581	135.071	13.6	5	7	179.08	13.6	5	7	163.066	13.79	6	8	177.714	13.41	6	8	168.643	12.26	6	8	124.968	13.79	6	8
IPI00644497.4	Conserved hypothetical protein	23.89	9	6	6	9	0	0	0	0	0	0	0	0	0	0	0	0	0.000482383	0.000373134	0	0
IPI00061178.1	RNA binding motif protein, X-linked-like 1	23.85	1	4	14	65	0.00194403	0.00164453	0.000125854	0.000151978	0.00731972	0.00557431	0	0	0.00511773	0.00456362	0.000265682	0.000268541	0.00991847	0.00836422	0	0		0				0				0				0			441.003	22.56	11	16	396.712	22.31	11	15
119577230	heterogeneous nuclear ribonucleoprotein L, isoform CRA_a [Homo sapiens]	23.52	16	2	8	20	0	0	0	0	0	0	0.00171003	0.00193803	0	0	0	0	0	0	0.000165323	0.000119508																										0
IPI00013894.1	Stress-induced-phosphoprotein 1	23.2	2	11	11	20	0	0	0.000464504	0.000534891	0	0	0.000310484	0.000258619	0	0	0.000271533	0.000544942	0	0	0	0										0			56.9927	11.05	5	5										0
IPI00007797.3	Fatty acid-binding protein, epidermal	22.96	1	4	4	4	0.000431873	0	8.37948e-05	0	0	0	0	0	8.92183e-05	0	0.000110988	0.000140449	3.8731e-05	0	0	0		0								0								0
114667176	PREDICTED: similar to Keratin, type I cytoskeletal 14 (Cytokeratin-14) (CK-14) (Keratin-14) (K14) [Pan troglodytes]	22.71	1	1	18	60	0	0	0	0	0	0	0.000496235	0.000578202	0	0	0	0	0	0	0.000747592	0.000253167																									138.116	5.77	5
IPI00465248.5	Isoform alpha-enolase of Alpha-enolase	22.58	1	7	7	10	0	0	0.000182736	0.000226617	0	0	0	5.15075e-05	0	0	0.000218292	0.000203532	0	0	0	0									118.115	15.67	5	5	122.946	15.67	5	5
IPI00328840.9	THO complex 4	21.59	1	4	4	52	0.00143459	0.00174964	0	0	0.00184586	0.00212861	0	0	0.000871769	0.00132786	0	0	0.00110089	0.00122527	0	0		0				0											254.685	12.12	3	6	172.84	12.12	3	5
114637928	PREDICTED: similar to Chain X, Crystal Structure Of The Human Fen1-Pcna Complex isoform 1 [Pan troglodytes]	21.52	28	5	5	10	0	0	0	0	0	0	0	0	0	0	0	0	0	0	0	0
IPI00910614.1	heterogeneous nuclear ribonucleoprotein R isoform 4	21.24	5	6	11	20	0	0.000597216	0.000613757	0.000889501	0.000339697	0.00026797	0.00237638	0.00245236	0.000527222	0.000492771	0.00161888	0.00142705	0.00104983	0.00143198	0.000442039	0.00165196						0				0				0				0				0				0
IPI00013396.3;4507127	U1 small nuclear ribonucleoprotein C	20.75	32	4	4	17	0	0	0.000671701	0.00091763	0.000722674	0.000851762	0	0	0	0	0.000287471	0.000275786	0.000221926	0	0.000893142	0.000888647									126.072	20.13	3	4		0			135.69	20.75	4	5		0
146386739	Chain A, Solution Structure Of Nucleic Acid Binding Protein Cugbp1ab And Its Binding Study With Dna And Rna	20.32	21	3	3	3	0	0	0	0	0	0	0	0	0	0	0	0	0	0	6.4357e-05	6.42822e-05
IPI00396171.3;641916	Isoform 1 of Microtubule-associated protein 4	20.31	22	19	19	145	0.00201921	0.00210124	0.000244401	0.000255421	0.00131727	0.00169917	0.000442366	0.000443494	0.00111568	0.000725901	0.000147139	9.591e-05	0.000712941	0.000639547	0.000524056	0.000263881	99.7415	5.9	6	6	194.993	10.59	9	10	85.5224	5.9	5	5	56.5795	3.73	3	3	154.968	7.2	6	8	219.897	11.11	9	11	171.155	5.38	5
73971009	PREDICTED: similar to PC4 and SFRS1 interacting protein 1 isoform 1 isoform 3 [Canis familiaris]	20.23	23	1	7	20	0	0	0	0	0	0	0.000129755	0.000313222	0	0	0	0	0	0	0.000265389	0.000280464																									115.743	12.82	4
IPI00450768.7	Keratin, type I cytoskeletal 17	19.91	1	5	10	18	0.00276441	0.00130641	0.000654799	0.000341587	0.000545104	0.000639651	0	0	0.00266902	0.00254699	0.00143269	0.00129734	0.00182331	0.00161929	0	0.000242629		0				0				0				0				0				0
IPI00007063.5	Hepatoma-derived growth factor-related protein 3	19.7	1	3	3	6	0.0017637	0.00172405	0.000278277	0.000462202	0.000725729	0.000541298	0	0	4.43601e-05	4.21628e-05	0.000138856	9.75332e-05	0.000321901	0.000578958	0	0		0				0				0				0				0				0
IPI00100151.4;18860916	Isoform 1 of 5'-3' exoribonuclease 2	19.68	24	17	17	58	0	0.000317218	0	0	0	0	0	0	0	0	0.000602947	0.000640249	7.47039e-05	0.000178954	0.000657423	0.000297762						0
IPI00798375.2	cDNA FLJ59357, highly similar to Probable ATP-dependent RNA helicase DDX5	19.67	2	10	12	24	0	0	0.000146781	0.000137627	0.000166986	9.30612e-05	0	0	0	9.7914e-05	0.000326068	0.000459601	0.00010261	0	0	0										0				0				0				0
IPI00016610.2	Poly(rC)-binding protein 1	19.66	1	4	4	4	0	0	0	0	0	0	0	0	0	0	9.10384e-05	6.51043e-05	0	0	6.61017e-05	6.24796e-05
IPI00478896.3	Ribosomal protein L7a	19.37	3	5	5	26	0.00474412	0.00614215	0	0	0.000845134	0.000641701	0	0	0.00281743	0.00154765	0	0	0.000202541	0.000556141	0	0	55.2341	13.09	3	3		0											25.8067	10.99	3	4		0
IPI00217465.5	Histone H1.2	19.25	1	2	3	9	0.000865173	0.00071901	0	0	0.000274544	0.00022589	0	0	0.000284285	0.000443132	0	0	0	0	0	0		0				0												0				0
IPI00942979.1;4507521	Transketolase	18.94	15	10	10	21	6.67445e-05	0	0.000556599	0.000372765	0	0	0.000167543	0.000269616	8.12904e-05	1.85718e-05	0.000104114	7.33359e-05	0.000161652	0.000156009	0	0		0							148.12	18.94	10	11	96.2374	11.56	5	6									157.296	9.47	3
IPI00179964.5;14165466	Isoform 1 of Polypyrimidine tract-binding protein 1	18.83	17	10	10	100	0	0.00352158	0.00610308	0.00557154	0.00217317	0.00174432	0.027727	0.0328883	0.00166486	0.00172049	0.00849538	0.00799006	0.00481319	0.00353144	0.0111232	0.010674						0			88.9162	6.21	3	4	69.0102	6.21	3	4	87.9595	6.21	3	6		0				0
IPI00746438.2	Isoform 2 of 60S ribosomal protein L11	18.64	2	3	3	3	0	0	0	0	0.000407687	0.000400238	0	0	0.000171158	0.00015648	0	0	0.000188139	0.000283291	0	0																		0				0
IPI00033611.5	Isoform 2 of RNA-binding motif, single-stranded-interacting protein 1	18.36	3	6	7	37	8.31759e-05	6.42825e-05	0	0	0.00193669	0.00190022	0	0	0.00105772	0.00101165	0	0	0.00195606	0.00226007	0	0		0				0											104.524	9.68	4	5	90.449	13.15	4	4
327280715	PREDICTED: splicing factor U2AF 65 kDa subunit-like isoform 1 [Anolis carolinensis]	17.98	10	5	5	15	0	0	0	0	0	0	0.000206812	0.000189374	0	0	0	0	0	0	0.000200381	0.000198931																										0
1351907	RecName: Full=Serum albumin; AltName: Full=BSA; AltName: Allergen=Bos d 6; Flags: Precursor	17.96	2	2	9	17	0	0	0	0	0	0	0.000230319	0.000199691	0	0	0	0	0	0	0	4.29551e-05																									180.327	12.69	6
IPI00645452.1	Tubulin, beta	17.84	3	6	6	11	0	0	0	0	0	0	0	0	0	0	0.000238199	0.000250128	0	0	0	0
IPI00383423.3;28372509	Isoform 1 of Coiled-coil domain-containing protein 50	17.65	2	5	5	18	0	0	0.000347332	0.000394348	0	0	0.000155724	0.000191242	0	0	7.90808e-05	8.78923e-05	0	0	0	0									96.2241	17.65	5	6	98.3759	17.65	5	5									108.605	12.09	3
IPI00002501.1	Cyclic AMP-dependent transcription factor ATF-1	17.34	1	3	4	7	0	0	0.000328338	0.000266615	0.000535091	0.000378884	0	0	7.21524e-05	0	0.000203313	0.000188258	0.000296519	0	0	0										0			39.9059	17.34	3	3		0				0
IPI00761069.1	calpastatin isoform f	17.33	11	7	7	10	0	0	0	0	0.000157429	0	0	0	0	0	0	0	0.000146619	0	0	0																	102.153	13.47	5	6
IPI00020194.1	Isoform Short of TATA-binding protein-associated factor 2N	17.32	2	6	9	45	0.00123945	0.00113383	0.00010885	8.14258e-05	0.00244728	0.00258462	0.000314028	0.000354978	0.0010386	0.000861966	0.000200534	0.000247567	0.00156672	0.00176278	0	0	67.8534	6.96	3	4	57.9961	8.66	3	4		0				0				0			117.912	11.38	5	7		0
IPI00021266.1	60S ribosomal protein L23a	17.31	2	4	4	6	0.00140665	0.00135572	0	0	0.000345057	0.000486274	0	0	0.000706616	0.000466071	0	0	3.49681e-05	7.22809e-05	0	0		0				0											108.544	17.31	4	6		0
IPI00793930.1	TUBA1B protein	17.31	6	4	4	7	0	0	0	0	0	0	0	0	0	0	8.94849e-05	7.07137e-05	0	0	1.69299e-05	0
IPI00893062.1	X-ray repair complementing defective repair in Chinese hamster cells 6	17.17	3	11	11	33	0	0.000330031	0.000288716	0	0.0015067	0.00233308	0	0	0.00125517	0.00115649	0.000603464	0.000386847	0.00135218	0.000854492	7.94311e-05	8.10767e-05						0				0							109.197	4.47	4	7		0
IPI00937615.2;4503481	Elongation factor 1-gamma	17.16	35	6	6	7	0	0	0	0	0	0	0	0	0	0	5.6788e-05	8.81821e-05	0.000156373	0.000210871	0	5.098e-05
IPI00643041.3	GTP-binding nuclear protein Ran	17.13	2	4	4	6	0	0.000535232	0.00041545	0.000596679	0	0.000249426	0.00247096	0.00274738	0	0	0.000441035	0.000293471	0	0.000252835	0.000112422	0						0			39.9222	10.65	3	3		0								0				0
116283586	RNMT protein [Homo sapiens]	17.07	4	4	4	14	0	0	0	0	0	0	0.00109515	0.00105154	0	0	0	0	0	0	0.000343672	0.000146276																										0
IPI00398673.4	Putative uncharacterized protein ENSP00000383249	16.67	3	3	3	6	0	0	0	0	0	0	0	0	0	0	0	0	0	0	0	0
IPI00878075.1	23 kDa protein	16.5	8	4	4	6	0	0	0.000442742	0.000373309	0	0	5.26234e-05	0	0	0	0.000161322	0.000156322	0	0	0	0									33.2116	11	3	3	54.6546	12	3	3										0
229552	albumin	16.35	1	1	8	17	0	0	0	0	0	0	0.000159776	0.000199691	0	0	0	0	0	0	0	4.29551e-05																										0
IPI00556173.1;212549555	Isoform 6 of Interleukin enhancer-binding factor 3	16.29	58	7	9	25	0	0	6.6366e-05	0	0.00014037	0	0	0	0	0	0.000180702	0.000172036	0.000125997	0	0.00117225	0.00111977										0								0
IPI00470805.2	Isoform 2 of Mediator of DNA damage checkpoint protein 1	16.16	8	13	13	19	0.00352558	0.0032858	0	0	0.000865309	0.000650345	0	0	0.000570851	0	0	0	0.000191402	0	0	0		0				0											215.112	8.82	7	9		0
IPI00909077.1	cDNA FLJ60514, highly similar to Fructosamine-3-kinase	15.84	2	3	3	3	0	0	0.000137092	0.00021394	0	0	0	0	0	0	0	9.71119e-05	0	0	0	0									95.7419	15.84	3	3		0
IPI00021536.2	Calmodulin-like protein 5	15.75	1	4	4	13	0.000620889	0.000859981	0.000320281	0	0.00129816	0.000868315	0	0	0.000593387	0.000620793	0.00045662	0.000794568	0.000717154	0.00079386	0.000207257	0		0				0				0								0				0
IPI00845305.2;194376026	cDNA FLJ57962, highly similar to Homo sapiens eukaryotic translation initiation factor (eIF) 2A (eIF2A), mRNA	15.46	16	6	6	66	0.00132053	0.000404051	7.41833e-05	0.000887944	0.00125889	0.00105602	0.00249872	0.00199321	0.00101507	0.0010762	0.000700448	0.000536854	0.000983319	0.000761145	5.29066e-05	0.000492004		0				0				0				0			142.179	8.97	3	5	123.553	8.97	3	4		0
IPI00012442.1	Ras GTPase-activating protein-binding protein 1	15.45	2	7	7	72	0.00453214	0.00585721	9.21724e-05	9.77907e-05	0.000543276	0.000699464	0	0	0.00261054	0.00130434	0.000322253	0.000310311	0.000575006	0.00263057	0	0	68.9147	5.15	3	3	74.8733	5.15	3	3		0				0			137.748	11.37	5	10	166.266	11.37	5	12
38569421;IPI00021290.5	ATP-citrate synthase isoform 1 [Homo sapiens]	15.35	18	13	13	59	0	0	0	7.43263e-05	0	0	0.00116382	0.000699102	0	5.77003e-05	0.000124801	0.000160732	0.000465568	0.000386153	0.000380646	0.000459056														0											182.046	3.54	3
IPI00003438.2	DnaJ homolog subfamily C member 8	15.02	1	4	4	6	0	0	0.000759507	8.84448e-05	0	0	0.000111647	0.000217006	0	0	0.000303963	0.000217466	0	0	0.00015199	5.08167e-05										0			36.0788	11.46	3	3										0
IPI00848226.1	Guanine nucleotide-binding protein subunit beta-2-like 1	14.2	1	4	4	5	0	0	0.000113558	0.000167404	0.00010171	0	0	0	0	0	7.96365e-05	0.000112892	9.37478e-05	0	0	0										0				0				0
IPI00217467.3	Histone H1.4	14.16	1	2	3	3	0.000869494	0.000735358	0	0	0.00017298	0.0001845	0	0	0.000297765	0.000454466	0	0	0	0	0	0		0				0												0				0
IPI00217468.3	Histone H1.5	14.16	1	3	3	3	0.000420267	0.000785435	0	0	0.000168012	0.000211231	0	0	0.000144257	0	0	0	0	0	0	0		0				0												0				0
IPI00003362.2	HSPA5 protein	14.05	1	5	7	12	0	0	0.00052277	0.000598969	0	0	0	0	0	0	0.000813244	0.000849213	0	0.000167823	0.000102687	0.000113796										0				0
IPI00645329.1	46 kDa protein	13.9	2	4	4	7	0	0	0.00025878	0.000372985	0	0	8.34683e-05	0.000106463	0	0	0.000506781	0.000469675	0	0	0.000210854	0.000294462										0				0												0
IPI00419919.5	60S ribosomal protein L29	13.84	2	3	3	6	0.0116693	0.0058513	0	0	0.00893832	0.00526258	0	0	0.00282566	0.00268311	8.6084e-05	9.5121e-05	0.0034906	0.00403455	0	0		0				0												0				0
IPI00221345.1	Isoform 1 of YTH domain family protein 1	13.77	2	4	5	5	0.00822775	0.00780586	0	0	0.000224332	0	0	0	0.00252867	0.00520664	0	0	0.000909648	0.00162179	0	0		0				0												0
IPI00397024.1	Isoform 2 of YTH domain family protein 2	13.61	3	7	8	12	0.00822775	0.00780586	0	0	0.000485165	0.000253973	0.000399028	0.000476727	0.00178946	0.00270874	0	0	0.00136005	0.00213016	0.000155075	0.000137998		0				0												0				0				0
IPI00550906.6	Cleavage stimulation factor 64 kDa subunit, tau variant	13.31	1	1	7	13	0	0	0.000882386	0.00105201	0.00028389	0	0.000257922	0.000294048	0.000187747	0.000287127	0.00055786	0.000518735	0.000167916	0	0	0.000247817									214.542	12.5	6	6	167.255	13.31	7	7		0								0
IPI00004655.1	Protein FRG1	12.79	1	4	4	9	0.00118285	0.00130545	0	0	0	0	0	0	0.000299249	0.000410887	0	0	7.2094e-05	0.000212672	0	0		0				0																0
IPI00794875.1	41 kDa protein	12.63	2	5	5	20	0.00246846	0.00168064	0.00018323	0	0	0	0.000132587	0.000188091	0.000938878	0.000675957	0.000127924	0.000183111	0.000106459	0.000187752	0	0		0			103.016	8.06	3	3		0																0
157277948	radixin isoform a [Mus musculus]	12.35	27	1	8	23	0	0	0	0	0	0	0.000143361	0.00012832	0	0	0	0	0	0	0.000154475	0.000181002																									149.988	5.83	3
IPI00893055.1	25 kDa protein	12.34	3	3	3	3	0.000307415	0.000372085	0	0	0	0	0	0	5.10641e-05	0	0	0	0	0	0	0		0				0												0
IPI00221106.5	splicing factor 3B subunit 2	12.29	1	10	10	35	0.000492973	0.000362961	0	0	0	0	0	0	0	0	0	0	0	0	0	0		0				0
230867	Chain R, Twinning In Crystals Of Human Skeletal Muscle D- Glyceraldehyde-3-Phosphate Dehydrogenase	12.28	1	2	3	6	0	0	0	0	0	0	0.00025439	0.000248712	0	0	0	0	0	0	0.000113621	0.000106809																									142.304	12.28	3
IPI00293254.1	Isoform EWS-B of RNA-binding protein EWS	12.01	7	7	7	42	0.00314907	0.00311192	0	0	0.00149383	0.00139188	0	0	0.000950078	0.000853501	0	0	0.000756449	0.000772138	0	0		0				0											201.041	8.75	5	6	78.6562	9.61	4	4
114582388	PREDICTED: chaperonin isoform 9 [Pan troglodytes]	12.01	28	4	4	4	0	0	0	0	0	0	0	0	0	0	0	0	0	0	0	0
158147453	heat shock protein 70 kDa [Demania scaberrima]	11.65	1	1	7	8	0	0	0	0	0	0	0.000752938	0.00119509	0	0	0	0	0	0	0.000266412	0.000286455																										0
IPI00021417.3	U4/U6.U5 tri-snRNP-associated protein 1	11.38	1	6	6	10	0	0.000253633	0	0	0.000181281	0	0	0	0.000135909	0	0	0	6.0164e-05	0	0	0						0												0
IPI00889541.2;38201710	Isoform 4 of Probable ATP-dependent RNA helicase DDX17	11.25	28	6	8	14	0.00143228	0.001243	0.00105211	0.00112462	0.000847582	0.00133344	0.000803708	0.000852889	0.000391624	0.000342841	0.000315893	0.000450982	0.000499853	0.000907397	0.000121103	0.000114207		0				0				0				0				0				0				0
IPI00172474.3	Isoform 2 of Zinc finger protein 91 homolog	11.15	2	3	3	9	0.00386434	0.00379961	0	0	0.00187011	0.00176618	4.93996e-05	6.73649e-05	0.00185211	0.00174005	0	0	0.000939962	0.000607589	0	0		0				0											105.154	11.15	3	3	122.991	11.15	3	3		0
IPI00449049.5;156523968	Poly [ADP-ribose] polymerase 1	10.95	12	8	8	27	0	0.000279473	0.000378425	0.000832554	0.000311401	0.00036123	0.000519758	0.000801947	0.000185141	7.04575e-05	0.000331912	0.000315502	0.00028462	0	0	0						0			112.242	3.94	3	3		0				0				0			121.008	3.94	3
IPI00915274.1	dyskerin isoform 2	10.81	2	4	4	10	0.000123001	0.000111298	0	0	0.000155499	0	0	0	0.000241565	3.28943e-05	0	0	0	0	0	0		0				0												0
IPI00910728.1	cDNA FLJ57599, moderately similar to Eukaryotic translation initiation factor 3 subunit 1	10.78	2	3	3	7	0.000185936	0.00025651	0.000476543	0.0014456	0.00195922	0.00131163	0	0	0	0.000115349	0.000328994	0	0.000588838	0	0	0		0				0			54.4591	10.78	3	3		0				0				0
IPI00794246.1	36 kDa protein	10.73	5	3	3	3	0	0	0	0	8.0504e-05	0	0	0	9.39458e-05	8.20593e-05	0	4.51828e-05	0.000120216	0.000263221	0	0																		0
IPI00328715.4	Protein LYRIC	10.65	1	5	5	7	0.000637474	0.0010836	0	0	0.000683603	0.000737324	0	0.000191773	0.000814826	0.000764969	0	0	0	0.000610355	0	0		0				0												0				0
24308207	leucine-rich repeat-containing protein 47 [Homo sapiens]	10.29	1	5	5	8	0	0	0	0	0	0	0	0	0	0	0	0	0	0	0	0
IPI00219217.3	L-lactate dehydrogenase B chain	10.18	1	3	3	3	0	0	0.000257208	0.000232658	0	0	0	0	0	0	0.000188377	0.000213041	0	0	0	0										0			56.09	10.18	3	3
IPI00382804.1	EEF1A protein (Fragment)	10.13	7	3	3	3	0	0.00275191	0.000172292	0	0.00152075	0	0	0	0	0	0.000374673	0.000379208	0.000659622	0.000243137	0	0						0				0								0
IPI00025815.2	TDP43	10.1	2	4	4	6	0.000519707	0.000498975	0	0	0	0	0	0	0.000372616	0.000291449	0.000219583	0.000231055	0	0.000415604	0	0		0				0
IPI00006379.1	Nucleolar protein 58	10.02	1	3	3	4	0.00059232	0.000494104	0	0	0.000482966	0.000500414	0	0	0.00021364	0.000237764	0	0	0	0.000190814	0	0		0				0												0				0
IPI00943203.1	cDNA FLJ11695 fis, clone HEMBA1005019, highly similar to Homo sapiens SCC-112 protein (SCC-112), mRNA	9.91	3	3	3	3	0	0.000638694	0	0	0.000308604	0.000200491	0	0	0.000212975	0.000276001	0	0	0	0	0	0						0												0				0
90075792	unnamed protein product [Macaca fascicularis]	9.73	17	3	3	6	0	0	0	0	0	0	0	0	0	0	0	0	0	0	0	0
IPI00220834.8	ATP-dependent DNA helicase 2 subunit 2	9.7	1	6	6	10	0	0	0	0	0	0	0	0	0	0.000821218	0.000377377	0.000425621	0.000603599	0.000274225	0	0
IPI00418471.6	Vimentin	9.66	1	3	3	3	0	0	0	0	4.73071e-05	0	0	0	0	0	0	0	0	0	0	0																		0
IPI00003706.1	RNA-binding motif, single-stranded-interacting protein 2	9.58	2	3	4	4	0	0	0	0	0.000750894	0.000859998	0	0	0.00173062	0.000945978	0	0	0.000966778	0.00220277	0	0																		0				0
30506;IPI00025753.1	desmoglein type 1 [Homo sapiens]	9.53	3	8	8	23	0	0	4.59088e-05	0	0.000130747	4.28628e-05	0.000171937	0.000162923	0.000127122	0.000106216	8.69663e-05	6.12099e-05	6.14989e-05	0	0.000265194	0.000284875										0								0				0				0
IPI00293655.3;4826686	ATP-dependent RNA helicase DDX1	9.46	27	6	6	14	0	0	5.62169e-05	6.39577e-05	0	0	0.000136777	0.000156999	0	0	0.000192162	0.00016754	0.000115781	0	8.86178e-05	9.28568e-05										0				0												0
IPI00909570.1	cDNA FLJ56548, highly similar to Elongation factor 2	9.36	2	4	4	6	0	0	0.000265109	0	0	0	0	0	0	0	9.23245e-05	0.000105428	0	0	0	0									105.652	7.6	3	3		0
IPI00104050.3	Thyroid hormone receptor-associated protein 3	9.32	1	10	10	53	0.00125964	0.000861762	0	0	0.000482529	0.000479908	0	0	0.000576474	0.000564086	5.41866e-05	0	0.000189696	0	0	0		0			72.3494	3.66	3	3									117.502	4.61	4	5		0
119604309	zinc finger CCCH-type, antiviral 1, isoform CRA_b [Homo sapiens]	9.22	8	3	3	3	0	0	0	0	0	0	0	0.000104109	0	0	0	0	0	0	0.000120459	0
IPI00789324.3	cDNA FLJ60424, highly similar to Junction plakoglobin	9.06	1	3	5	11	0.00276441	0.00244324	0.000688099	0.000269449	0.000232583	0.00025584	0.00118977	0	0.00145058	0.00139971	0.00126268	0.00109742	0.00143535	0.00129743	8.79155e-05	0.000180142		0				0				0				0				0				0				0
193787621	unnamed protein product [Homo sapiens]	9.03	6	3	3	3	0	0	0	0	0	0	0.000186255	0.00029449	0	0	0	0	0	0	0	0																										0
IPI00910754.1	lactate dehydrogenase A isoform 2	8.76	6	3	3	3	0	0	0.000344489	0.000771605	0	0	0	0	0	0	0	0.000228428	0	0	0	0									42.9815	8.76	3	3		0
IPI00216953.1	Isoform ADelta10 of Lamin-A/C	8.52	4	4	4	9	0	0	0.000161811	0.000180301	0.000277037	0.000600002	0	0	8.06055e-05	7.79102e-05	0.000151312	5.04174e-05	0.000233643	0.000248992	0	0										0				0				0				0
IPI00329633.5	Threonyl-tRNA synthetase, cytoplasmic	8.02	3	6	6	12	0	0.000105837	0.000858332	0.000518982	0.000607839	0.000497312	0.000439829	0.000510445	0	0	0.000205104	0.000373924	0	0.000274951	0	0						0			72.3416	8.02	6	6	68.9913	4.84	3	3		0				0				0
IPI00413173.3	Isoform Short of Antigen KI-67	7.87	2	15	15	34	0.000343985	0.000629315	0	0	0.000348596	0.000472839	0	0	0.000167291	0.000235215	0	0	0.000108804	0.000173181	0	0		0			33.8294	1.62	3	3									212.815	6.32	11	12	152.03	6.66	11	11
IPI00647720.1	Isoform 1 of Serine/arginine repetitive matrix protein 1	7.63	2	5	5	12	0	0.00150496	0	0	0.000352723	0.000442881	0	0	0	0.000177398	0	0	0	0	0	0						0												0				0
IPI00299254.3	Eukaryotic translation initiation factor 5B	7.3	1	6	6	19	0	0	0	0	0	0	0	0	0	0	0	0	0	0	0	0
164698494	septin-9 isoform a [Homo sapiens]	7.17	2	3	3	3	0	0	5.83428e-05	0	0	0	0.000135768	0.000122952	0	0	0	0	0	0	0	0										0																0
IPI00008449.1	Isoform 3 of Pre-mRNA 3'-end-processing factor FIP1	7.12	3	3	3	3	0.00198899	0	0	0	0.00142918	0.00168798	0	0	0	0.000668419	0	0	0	0	0	0		0																0				0
IPI00030012.4	Putative uncharacterized protein MAP7D1	7.05	4	3	3	3	0.00068799	0.000869395	0	0	0	0	0	0	0.000218458	0	0	0	0	0	0	0		0				0
IPI00797452.2	cDNA FLJ55805, highly similar to Keratin, type II cytoskeletal 4	6.96	2	3	3	3	0.00242108	0.00214683	0.000718299	0.000858303	0.00135761	0.00197447	0	0	0.00359241	0.00338895	0.00105257	0.00128828	0.000610042	0.00125062	0	0.000227047		0				0				0				0				0				0
IPI00472891.2	SWI related protein	6.95	4	5	5	16	0.00217027	0	0	0	0.000328583	0.000995705	0	0	0.00108073	0.000740488	0	0	0.000401583	0.000472736	0	0		0															60.7539	3.64	3	3		0
IPI00386975.3	Isoform 1B of Desmocollin-1	6.9	2	4	4	8	0	0	0	0	0	0	0	0	0	0	0	0	0	0	0	5.89858e-05
IPI00414676.6	Heat shock protein HSP 90-beta	6.22	1	4	4	6	0	0	0	0	0	0	0	0	0	0	0.00011606	9.67347e-05	5.67271e-05	0	0	0
IPI00013933.2	Isoform DPI of Desmoplakin	6.13	1	17	17	26	0	0	0	0	8.79252e-05	0	0	0	7.81815e-05	0	4.87995e-05	4.98331e-05	0	0	0	6.44387e-05																		0
IPI00171127.1	Ubiquitin-associated protein 2	6.08	3	5	5	20	0	0	0	0	0.000656023	0.000330413	0.000147894	0.000183199	0.00053406	0.000495527	7.86607e-05	0	0.000383259	0.000292334	0	0																	160.542	6.08	5	5		0				0
IPI00171217.2	Isoform 1 of A-kinase anchor protein 2	5.94	3	3	3	12	0.000395407	0.000422131	0	0	0	0	0	0	0	0	0	0	0	0	0	0		0				0
IPI00306369.3	tRNA (cytosine-5-)-methyltransferase NSUN2	5.87	1	4	4	6	0	0	0	0	0	0	0	0	0	0	9.73162e-05	7.86314e-05	5.37247e-05	0	0	0
296232891	PREDICTED: LOW QUALITY PROTEIN: interleukin enhancer-binding factor 3-like [Callithrix jacchus]	5.47	53	2	4	12	0	0	0	0	0	0	0	0	0	0	0	0	0	0	0.00117225	0.00111977
26335437	unnamed protein product [Mus musculus]	5.38	17	3	3	6	0	0	0	0	0	0	4.46133e-05	0	0	0	0	0	0	0	0	0																										0
IPI00873244.1	Isoform Short of Cold shock domain-containing protein E1	4.56	3	3	3	3	0	0	0	0	0.000297255	0.00037385	0	0	0.000159406	0	6.66946e-05	7.96977e-05	0.000167972	0.000276754	0	0																		0				0
IPI00908876.1	cDNA FLJ50830, highly similar to Serum albumin	4.21	3	3	3	3	0.00130917	0.000686267	0.000266917	0.00052896	0	0.000488879	0	0	0.000431169	0.000555357	6.41734e-05	0.000221732	0	0.000559826	0	0		0				0				0				0								0
IPI00006025.1	Isoform 1 of Squamous cell carcinoma antigen recognized by T-cells 3	4.05	1	3	3	3	0	0	0	0	0.000315314	9.79034e-05	0	0	0.000558609	0.0012306	0	0	0.000189172	0.000417398	0	0																		0				0
IPI00876984.2	Putative uncharacterized protein AHCTF1 (Fragment)	3.78	4	6	6	14	0.00058761	0.00062549	0	0	0	0	0	0	0	0	0	0	0	0	0	0		0				0
IPI00940155.1	227 kDa protein	3.65	21	4	4	6	0	0	0	0	0.000558194	0.00048238	0	0	0.000296825	0	0	0	0.000551695	0	0	0																	116.017	3.13	3	3		0
IPI00786995.1	similar to protein kinase, DNA-activated, catalytic polypeptide	3.03	3	11	11	41	0.00104113	0.000566035	0	0	0.000373399	0.000184448	0	0	0.000344399	0.000205097	8.87285e-05	5.68741e-05	0	0.000162591	0	0		0			79.6778	1.34	4	4										0				0
IPI00181641.5	Isoform 2 of YLP motif-containing protein 1	2.85	4	3	3	3	0	0.000615084	0	0	0	0	0	0	0	0	0	0	0	0	0	0						0
IPI00220918.1	Isoform 2 of DNA (cytosine-5)-methyltransferase 1	2.57	2	4	4	4	0	0.000675361	0	0.000107113	0.000341521	0.000183214	0	0.000111576	0.000496254	0	4.08677e-05	0	0.000233191	0	0	0						0								0			51.3781	2.57	4	4		0
IPI00936444.2	Mucin-5B	2.33	3	5	5	9	0	0	0	0	0	0	0	0	0	0	0	0	0.000453641	0.000235821	0	0
IPI00782992.3	Isoform 1 of Serine/arginine repetitive matrix protein 2	2.25	1	5	5	10	0	0	0	0	0	0	0	0	0	0	0	0	0	0	0	0
IPI00909642.1	Filamin A	2.03	4	3	3	3	0	0	0	0	0	0	0	0	0	0	0	0	0.000172053	0.000197237	0	0
IPI00221325.3	E3 SUMO-protein ligase RanBP2	1.86	1	3	3	3	0	0	0	0	8.80036e-05	9.13645e-05	0	0	0	0	0	0	4.66672e-05	0	0	0																		0				0
IPI00217709.1	Isoform Beta-1 of DNA topoisomerase 2-beta	1.48	2	3	3	3	0	0	0	0	0	0	0	0	0	0	0	0	0	0	0	0
IPI00902970.1	Isoform 2 of BAT2 domain-containing protein 1	1.32	9	4	4	6	0	0	0	0	0.000225215	0.00053596	0	0	0.000199268	0.000310688	0	0	8.62042e-05	0	0	0																	37.4953	1.21	3	3		0
[truncated: 40 more columns]

## Sheet: normalized median prot
Accession	Description	ΣCoverage	Σ# Proteins	Σ# Unique Peptides	Σ# Peptides	Σ# PSMs	median low (8 samples)	median high (8 samples)	p-value	ratio low/high	Log2 ratio	Log10 p-value
IPI00889541.2;38201710	Isoform 4 of Probable ATP-dependent RNA helicase DDX17	11.25	28	6	8	14	0.00108837	0.000367232	5.84383e-05	2.96371	1.5674	4.2333
IPI00215884.4;5902076	Isoform ASF-1 of Splicing factor, arginine/serine-rich 1	43.95	22	11	12	59	8.12793e-05	0.000587319	0.000968333	0.13839	-2.85318	3.01398
IPI00179700.3;22208967	Isoform HMG-I of High mobility group protein HMG-I/HMG-Y	85.05	6	5	20	286	0.00524639	0.000737872	0.00271668	7.11016	2.82988	2.56596
IPI00554761.2;48255933	Non-histone chromosomal protein HMG-14	39	13	8	8	81	0.00682627	0.00104055	0.00456909	6.56024	2.71375	2.34017
IPI00219365.3;4505257	Moesin	39.86	14	20	28	162	0.00148702	0.000794593	0.00787092	1.87142	0.904136	2.10397
IPI00220834.8	ATP-dependent DNA helicase 2 subunit 2	9.7	1	6	6	10	0	0.000325801	0.0118293	0	#NUM!	1.92704
IPI00021570.1	Isoform 1 of Endothelial differentiation-related factor 1	50	3	8	8	53	0.00117161	0.000247427	0.0160297	4.73517	2.24342	1.79507
IPI00449049.5;156523968	Poly [ADP-ribose] polymerase 1	10.95	12	8	8	27	0.000369828	0.000127799	0.0215889	2.89382	1.53298	1.66577
IPI00016610.2	Poly(rC)-binding protein 1	19.66	1	4	4	4	0	3.12398e-05	0.021859	0	#NUM!	1.66037
IPI00009032.1;10835067	Lupus La protein	50.25	3	26	26	96	0.000175194	0.000632024	0.0231615	0.277196	-1.85102	1.63523
IPI00937615.2;4503481	Elongation factor 1-gamma	17.16	35	6	6	7	0	5.3884e-05	0.0233705	0	#NUM!	1.63133
IPI00012340.1	Splicing factor, arginine/serine-rich 9	58.37	1	14	15	72	0	0.000534051	0.0238947	0	#NUM!	1.6217
IPI00442073.5	Cysteine and glycine-rich protein 1	58.55	1	9	9	25	0.00185654	0.000384641	0.0264924	4.82668	2.27103	1.57688
IPI00100151.4;18860916	Isoform 1 of 5'-3' exoribonuclease 2	19.68	24	17	17	58	0	0.000238358	0.0284497	0	#NUM!	1.54592
IPI00419585.9;10863927	Peptidyl-prolyl cis-trans isomerase A	87.27	45	16	16	99	0.00459815	0.00084293	0.0365511	5.45496	2.44757	1.4371
IPI00020956.1;4758516	Hepatoma-derived growth factor	40.42	22	11	13	84	0.00111159	0.000377261	0.0401549	2.94648	1.55899	1.39626
IPI00021304.1;181402	Keratin, type II cytoskeletal 2 epidermal	46.98	4	10	31	269	0.00321673	0.00442577	0.0419515	0.726818	-0.460335	1.37725
IPI00007063.5	Hepatoma-derived growth factor-related protein 3	19.7	1	3	3	6	0.00050175	7.09467e-05	0.056761	7.07221	2.82216	1.24595
IPI00169383.3;4505763	Phosphoglycerate kinase 1	52.52	11	19	19	78	0.000815669	0.000202418	0.0606214	4.02962	2.01064	1.21737
IPI00794246.1	36 kDa protein	10.73	5	3	3	3	0	6.36211e-05	0.0677108	0	#NUM!	1.16934
IPI00643041.3	GTP-binding nuclear protein Ran	17.13	2	4	4	6	0.000475341	5.6211e-05	0.0798664	8.45637	3.08004	1.09764
IPI00922811.1	cDNA FLJ54222, highly similar to Glycylpeptide N-tetradecanoyltransferase 1	33.58	2	3	3	3	0.000916308	0.000508534	0.0840003	1.80186	0.84949	1.07572
77695912;IPI00644708.1	nucleolysin TIAR isoform 2 [Homo sapiens]	26.79	19	13	13	71	0	0.000342258	0.0863248	0	#NUM!	1.06386
IPI00556173.1;212549555	Isoform 6 of Interleukin enhancer-binding factor 3	16.29	58	7	9	25	0	0.000149017	0.0925957	0	#NUM!	1.03341
IPI00000861.1;5453710	Isoform 1 of LIM and SH3 domain protein 1	26.82	22	6	6	29	0.000353147	0.000167645	0.0955024	2.10652	1.07486	1.01999
IPI00177716.7	Isoform HMG-Y of High mobility group protein HMG-I/HMG-Y	79.17	1	3	18	207	0.00201445	0.000624398	0.099952	3.22623	1.68985	1.00021
IPI00396171.3;641916	Isoform 1 of Microtubule-associated protein 4	20.31	22	19	19	145	0.000880381	0.000581801	0.105195	1.5132	0.597602	0.978004
IPI00217477.5	High mobility group protein B3	72	4	16	16	55	0.00102277	0.000410363	0.114547	2.49235	1.31751	0.941015
IPI00293434.2;149999611	Signal recognition particle 14 kDa protein	63.24	1	11	11	61	0.00162648	0.00115883	0.117259	1.40356	0.489089	0.930855
IPI00060627.2;19923969	Coiled-coil domain-containing protein 124	25.11	3	7	7	31	0.000582308	0.000238027	0.120689	2.4464	1.29066	0.918333
IPI00304596.3;34932414	Non-POU domain-containing octamer-binding protein	38.22	20	16	16	155	0.00110835	0.000874235	0.12108	1.26779	0.342315	0.916927
IPI00903145.1;4506467	Radixin	28.99	21	9	21	154	0.00188712	0.000785111	0.121461	2.40363	1.26521	0.915563
IPI00465439.5;4557305	Fructose-bisphosphate aldolase A	42.58	33	15	15	105	0.000802663	0.000473085	0.124343	1.69666	0.762694	0.90538
IPI00375441.2;17402900	Isoform 1 of Far upstream element-binding protein 1	75.62	2	6	68	986	0.0363704	0.0445524	0.126865	0.81635	-0.29274	0.896657
IPI00465044.2;29789090	Protein RCC2	24.71	2	11	11	104	0.0022341	0.000543501	0.13124	4.11058	2.03934	0.881934
IPI00299024.9	Isoform 1 of Brain acid soluble protein 1	29.52	1	3	3	3	0.00116974	0.000670891	0.132078	1.74356	0.802039	0.879171
IPI00845305.2;194376026	cDNA FLJ57962, highly similar to Homo sapiens eukaryotic translation initiation factor (eIF) 2A (eIF2A), mRNA	15.46	16	6	6	66	0.00115746	0.000730797	0.132989	1.58383	0.663416	0.876183
IPI00215911.3;18375501	DNA-(apurinic or apyrimidinic site) lyase	42.77	10	21	21	300	0.0112009	0.00394703	0.134063	2.83781	1.50478	0.872691
IPI00003706.1	RNA-binding motif, single-stranded-interacting protein 2	9.58	2	3	4	4	0	0.000472989	0.139199	0	#NUM!	0.856365
IPI00006025.1	Isoform 1 of Squamous cell carcinoma antigen recognized by T-cells 3	4.05	1	3	3	3	0	9.4586e-05	0.140215	0	#NUM!	0.853207
IPI00217963.3	Keratin, type I cytoskeletal 16	42.07	1	9	18	61	0.000861573	0.00155921	0.14698	0.55257	-0.855771	0.83274
IPI00217950.5	Non-histone chromosomal protein HMG-17	60	1	3	4	6	0.0110971	0.00181716	0.15529	6.10687	2.61043	0.808856
IPI00646304.4	Peptidyl-prolyl cis-trans isomerase B	60.19	2	13	13	67	0.000773971	0.000601546	0.167505	1.28664	0.363606	0.775973
IPI00927677.1;123123581	34 kDa protein	78.3	21	37	51	571	0.00892599	0.0139299	0.16763	0.640779	-0.6421	0.775648
IPI00450768.7	Keratin, type I cytoskeletal 17	19.91	1	5	10	18	0.000592377	0.00152599	0.170952	0.388192	-1.36516	0.767125
IPI00027834.3;52632383	Heterogeneous nuclear ribonucleoprotein L	44.65	16	16	22	133	0.00171622	0.00274218	0.171659	0.625862	-0.676084	0.765332
IPI00413173.3	Isoform Short of Antigen KI-67	7.87	2	15	15	34	0.000171992	5.4402e-05	0.173107	3.16151	1.66061	0.761684
IPI00293254.1	Isoform EWS-B of RNA-binding protein EWS	12.01	7	7	7	42	0.000695941	0.000378225	0.178215	1.84002	0.879722	0.749056
IPI00377261.1;100816392	Isoform 1 of Far upstream element-binding protein 3	46.5	8	16	22	168	0.00280238	0.00430674	0.179651	0.650697	-0.619942	0.74557
IPI00419258.4	High mobility group protein B1	67.91	3	20	28	295	0.00406348	0.00223854	0.182793	1.81524	0.860158	0.73804
IPI00942979.1;4507521	Transketolase	18.94	15	10	10	21	0.000117144	7.73131e-05	0.191602	1.51519	0.599497	0.7176
IPI00643781.1;71052048	PSIP1 protein	52.89	42	14	22	199	0.00298363	0.00114511	0.192073	2.60554	1.38158	0.716534
IPI00006378.3	Coiled-coil domain-containing protein 72	46.88	1	5	5	28	0.000884591	0.000140384	0.196886	6.30123	2.65563	0.705785
IPI00843975.1	Ezrin	27.99	2	14	19	87	0.000680447	0.000608092	0.198892	1.11899	0.162193	0.701382
IPI00419919.5	60S ribosomal protein L29	13.84	2	3	3	6	0.00263129	0.00138912	0.210571	1.89422	0.921602	0.676601
IPI00024320.1;5803137	Putative RNA-binding protein 3	70.7	3	9	9	206	0.00514862	0.0142795	0.210884	0.36056	-1.47169	0.675956
IPI00909208.1;194388148	cDNA FLJ58832, highly similar to Heterogeneous nuclear ribonucleoprotein A3	30.34	12	4	14	42	0.00613933	0.0136454	0.214716	0.449919	-1.15226	0.668135
IPI00219097.4	High mobility group protein B2	54.07	1	16	24	254	0.00368713	0.00262289	0.232994	1.40575	0.491344	0.632655
30506;IPI00025753.1	desmoglein type 1 [Homo sapiens]	9.53	3	8	8	23	4.43858e-05	9.65914e-05	0.235244	0.459522	-1.1218	0.628481
IPI00021266.1	60S ribosomal protein L23a	17.31	2	4	4	6	0.000172528	1.74841e-05	0.237504	9.86776	3.30272	0.624329
IPI00549248.4	Isoform 1 of Nucleophosmin	38.78	3	15	15	142	0.00555366	0.00130211	0.237672	4.26513	2.09259	0.624021
IPI00843996.1;224084730	Splicing factor, arginine/serine-rich 3, isoform CRA_a	63.71	14	9	9	62	0.00291941	0.00163726	0.245655	1.78311	0.834393	0.609675
IPI00172474.3	Isoform 2 of Zinc finger protein 91 homolog	11.15	2	3	3	9	0.000916774	0.000303794	0.251607	3.01775	1.59347	0.599277
IPI00013933.2	Isoform DPI of Desmoplakin	6.13	1	17	17	26	0	2.43997e-05	0.25527	0	#NUM!	0.593001
IPI00786995.1	similar to protein kinase, DNA-activated, catalytic polypeptide	3.03	3	11	11	41	9.22242e-05	7.28013e-05	0.262719	1.26679	0.341182	0.580508
IPI00384444.6	Keratin, type I cytoskeletal 14	27.33	1	2	13	63	0.000952992	0.00138528	0.270519	0.68794	-0.539645	0.567803
IPI00883857.2	Isoform Long of Heterogeneous nuclear ribonucleoprotein U	34.06	5	32	32	117	0.000126022	0.000268127	0.271913	0.470009	-1.08924	0.565571
IPI00386120.3;295842307	Isoform 6 of Splicing factor 1	47.46	37	18	38	625	0.0297989	0.0270881	0.273536	1.10007	0.137597	0.562986
IPI00719622.1	40S ribosomal protein S28	56.52	1	5	5	9	7.4242e-05	0.000263089	0.279312	0.282194	-1.82524	0.55391
IPI00219018.7	Glyceraldehyde-3-phosphate dehydrogenase	48.96	3	14	15	120	0.00191495	0.00105433	0.279395	1.81628	0.860985	0.553782
IPI00104050.3	Thyroid hormone receptor-associated protein 3	9.32	1	10	10	53	0.000239954	2.70933e-05	0.285998	8.85659	3.14675	0.543638
IPI00009865.3	Keratin, type I cytoskeletal 10	47.6	3	9	29	257	0.00214242	0.00365923	0.28856	0.585483	-0.7723	0.539764
IPI00002501.1	Cyclic AMP-dependent transcription factor ATF-1	17.34	1	3	4	7	0.000133308	3.60762e-05	0.299128	3.69517	1.88564	0.524143
IPI00012011.6;5031635	Cofilin-1	27.11	15	5	5	36	0.000505999	0.000294606	0.304381	1.71754	0.780347	0.516582
IPI00334713.1;55956921	Isoform 3 of Heterogeneous nuclear ribonucleoprotein A/B	68.07	17	46	48	752	0.0162311	0.021494	0.308215	0.755146	-0.405173	0.511147
IPI00014938.3;32129199	SAP domain-containing ribonucleoprotein	55.71	18	15	15	99	0.000688175	0.000384193	0.314567	1.79122	0.840944	0.502287
IPI00045498.4;15010818	Isoform 3 of Heterogeneous nuclear ribonucleoprotein D-like	82.38	6	34	51	884	0.0295843	0.0452801	0.315661	0.653361	-0.614049	0.500778
IPI00642816.2	Signal recognition particle 9 kDa protein	48.84	3	5	5	11	0.00123777	0.000705518	0.319403	1.75442	0.810992	0.495661
IPI00604620.3;55956788	Nucleolin	45.92	9	46	46	285	0.0020867	0.00367004	0.33487	0.568577	-0.814573	0.475124
IPI00909232.1	cDNA FLJ53542, highly similar to Heterogeneous nuclear ribonucleoproteins C	31.25	9	11	11	57	5.28962e-05	0.00013305	0.337277	0.397567	-1.33073	0.472013
IPI00908876.1	cDNA FLJ50830, highly similar to Serum albumin	4.21	3	3	3	3	0.000377898	0.000142953	0.338933	2.64352	1.40246	0.469886
IPI00291608.4;9966827	Isoform 1 of PEST proteolytic signal-containing nuclear protein	76.97	28	15	15	78	0.000442675	0.00018595	0.343324	2.38061	1.25133	0.464296
IPI00010740.1	Isoform Long of Splicing factor, proline- and glutamine-rich	29.28	1	24	24	114	0.00200849	0.000530213	0.349864	3.78808	1.92147	0.456101
IPI00478896.3	Ribosomal protein L7a	19.37	3	5	5	26	0.000320851	0.000101271	0.352069	3.16825	1.66369	0.453372
IPI00853059.2	Isoform 2 of Far upstream element-binding protein 1	68.04	1	1	55	711	0.0224461	0.0346361	0.353987	0.648056	-0.62581	0.451012
IPI00470497.3;66346681	Isoform 2 of Plasminogen activator inhibitor 1 RNA-binding protein	34.08	33	14	14	107	0.00153181	0.000990886	0.360109	1.5459	0.628446	0.443566
IPI00017448.1;4506699	40S ribosomal protein S21	79.52	25	8	8	53	0.000224691	0.000206563	0.360949	1.08776	0.121356	0.442554
IPI00382804.1	EEF1A protein (Fragment)	10.13	7	3	3	3	0	0.000121569	0.36859	0	#NUM!	0.433457
IPI00641351.1	RNA binding protein, autoantigenic	29.83	5	5	5	32	0	0.000251638	0.376484	0	#NUM!	0.424254
7657015;IPI00550689.3	tRNA-splicing ligase RtcB homolog [Homo sapiens]	31.68	10	17	17	103	0.000279188	0.000216121	0.377698	1.29181	0.369395	0.422855
IPI00645329.1	46 kDa protein	13.9	2	4	4	7	4.17341e-05	0.000105427	0.385033	0.395858	-1.33695	0.414503
IPI00909890.1;194386744	cDNA FLJ58049, highly similar to RNA-binding protein FUS	25.41	37	8	11	112	0.000935817	0.000624032	0.390088	1.49963	0.584606	0.408837
IPI00397024.1	Isoform 2 of YTH domain family protein 2	13.61	3	7	8	12	0.000437878	0.000757561	0.392871	0.57801	-0.790835	0.40575
IPI00004655.1	Protein FRG1	12.79	1	4	4	9	0	3.6047e-05	0.393211	0	#NUM!	0.405375
IPI00027798.1;13899289	Protein FAM103A1	34.75	1	5	5	32	0.000318217	0.000265483	0.400481	1.19863	0.261387	0.397418
IPI00293655.3;4826686	ATP-dependent RNA helicase DDX1	9.46	27	6	6	14	2.81085e-05	9.07373e-05	0.405102	0.309778	-1.69069	0.392436
IPI00794875.1	41 kDa protein	12.63	2	5	5	20	0.000157909	0.000155518	0.407974	1.01538	0.0220129	0.389368
IPI00019359.4	Keratin, type I cytoskeletal 9	56.5	1	18	30	263	0.00574184	0.00380917	0.409816	1.50737	0.592037	0.387411
IPI00061178.1	RNA binding motif protein, X-linked-like 1	23.85	1	4	14	65	0.000898254	0.00241608	0.413933	0.371781	-1.42747	0.38307
IPI00798375.2	cDNA FLJ59357, highly similar to Probable ATP-dependent RNA helicase DDX5	19.67	2	10	12	24	4.65306e-05	4.8957e-05	0.427858	0.950438	-0.0733355	0.368701
IPI00328840.9	THO complex 4	21.59	1	4	4	52	0.000717294	0.000435885	0.433495	1.64561	0.718619	0.363016
IPI00414963.2;114652134	Isoform 2 of Polyadenylate-binding protein 2	32.43	12	7	7	40	0.000397987	0.000257665	0.437231	1.54459	0.627228	0.359289
IPI00179964.5;14165466	Isoform 1 of Polypyrimidine tract-binding protein 1	18.83	17	10	10	100	0.00454656	0.00640163	0.44425	0.710219	-0.493664	0.352373
IPI00736859.1	Isoform 4 of Heterogeneous nuclear ribonucleoprotein U-like protein 1	26.46	4	20	20	122	0.000823908	0.000788547	0.448025	1.04484	0.0632873	0.348697
IPI00020194.1	Isoform Short of TATA-binding protein-associated factor 2N	17.32	2	6	9	45	0.000744405	0.000554766	0.470785	1.34183	0.424207	0.327177
IPI00003362.2	HSPA5 protein	14.05	1	5	7	12	0	0.000108241	0.474375	0	#NUM!	0.323878
IPI00796848.1	cDNA FLJ52570, highly similar to Splicing factor, arginine/serine-rich 2	43.06	3	13	13	101	0.000945787	0.00191119	0.481254	0.494867	-1.01489	0.317626
IPI00221222.7;197098442	Activated RNA polymerase II transcriptional coactivator p15	86.61	13	29	29	349	0.005991	0.00483632	0.488719	1.23875	0.308887	0.310941
433344;IPI00903278.1	p37 AUF1 [Homo sapiens]	66.43	33	4	46	144	0.045389	0.0641576	0.508988	0.707461	-0.499278	0.293292
IPI00220684.1;14110414	Isoform 3 of Heterogeneous nuclear ribonucleoprotein D0	68.3	31	6	48	670	0.045389	0.0641576	0.509813	0.707461	-0.499278	0.292589
IPI00033611.5	Isoform 2 of RNA-binding motif, single-stranded-interacting protein 1	18.36	3	6	7	37	3.21412e-05	0.000505826	0.536288	0.0635421	-3.97614	0.270602
IPI00014263.1	Isoform Long of Eukaryotic translation initiation factor 4H	48.39	1	15	15	104	0.00208316	0.00160965	0.540983	1.29417	0.372031	0.266816
IPI00550906.6	Cleavage stimulation factor 64 kDa subunit, tau variant	13.31	1	1	7	13	0.000270906	0.000217782	0.544611	1.24393	0.314908	0.263913
IPI00025815.2	TDP43	10.1	2	4	4	6	0	0.000225319	0.544853	0	#NUM!	0.263721
IPI00909622.1;194373969	cDNA FLJ58787, highly similar to Cleavage stimulation factor 64 kDa subunit	28.93	10	6	12	53	0.000521994	0.000552578	0.545582	0.944652	-0.0821445	0.26314
IPI00165230.1;25470886	Isoform 1 of DAZ-associated protein 1	50.61	7	25	25	411	0.0254712	0.0254614	0.557742	1.00039	0.000556269	0.253567
IPI00514561.1	Heterogeneous nuclear ribonucleoprotein K	27.57	7	12	12	74	0.000176208	0.000257409	0.561988	0.684545	-0.546783	0.250273
IPI00219147.4;224586884	Isoform 2 of DNA-binding protein A	82.18	5	9	20	157	0.0015807	0.00307296	0.566208	0.514388	-0.959071	0.247024
IPI00940851.1;38201714	ELAV-like protein 1	36.2	19	11	11	47	0.00035984	0.000435013	0.567844	0.827194	-0.273703	0.245771
IPI00013297.1	28 kDa heat- and acid-stable phosphoprotein	36.46	1	12	12	36	0.000320585	0.000227793	0.570064	1.40735	0.492984	0.244077
IPI00216953.1	Isoform ADelta10 of Lamin-A/C	8.52	4	4	4	9	8.09055e-05	7.92578e-05	0.574793	1.02079	0.0296836	0.240489
IPI00304925.5;167466173	Heat shock 70 kDa protein 1	31.36	30	13	15	61	0.000504285	0.000422967	0.57763	1.19226	0.253696	0.23835
IPI00003438.2	DnaJ homolog subfamily C member 8	15.02	1	4	4	6	4.42224e-05	2.54084e-05	0.584332	1.74047	0.799474	0.23334
IPI00012442.1	Ras GTPase-activating protein-binding protein 1	15.45	2	7	7	72	0.000320533	0.000448629	0.586071	0.714473	-0.48505	0.23205
45827706;IPI00514277.2	protein quaking isoform HQK-5 [Homo sapiens]	32.26	57	9	9	56	0.000186148	0.000357901	0.609465	0.52011	-0.943112	0.215051
IPI00221345.1	Isoform 1 of YTH domain family protein 1	13.77	2	4	5	5	0	0.000454824	0.616066	0	#NUM!	0.210373
IPI00909059.3;194387918	cDNA FLJ53910, highly similar to Keratin, type II cytoskeletal 6A	38.13	9	4	23	78	0.000909614	0.0011485	0.61876	0.792004	-0.33642	0.208478
IPI00909647.1;194385508	cDNA FLJ55159	25.44	4	6	6	9	0.000271288	0.000302797	0.621758	0.895941	-0.158525	0.206379
IPI00171127.1	Ubiquitin-associated protein 2	6.08	3	5	5	20	7.3947e-05	0.000185497	0.622214	0.398642	-1.32684	0.20606
IPI00893062.1	X-ray repair complementing defective repair in Chinese hamster cells 6	17.17	3	11	11	33	0.000144358	0.000728978	0.656053	0.198028	-2.33622	0.183061
IPI00220327.4;119395750	Keratin, type II cytoskeletal 1	59.32	5	39	43	457	0.00559576	0.00839387	0.674085	0.666649	-0.585001	0.171286
IPI00797452.2	cDNA FLJ55805, highly similar to Keratin, type II cytoskeletal 4	6.96	2	3	3	3	0.00110795	0.0011516	0.685375	0.962102	-0.0557386	0.164072
IPI00011726.1;4506589	Isoform 1 of RNA 3'-terminal phosphate cyclase	25.41	5	8	8	18	0	1.519e-05	0.704305	0	#NUM!	0.152239
IPI00031812.3;27807361	Nuclease-sensitive element-binding protein 1	79.32	51	14	25	204	0.00490387	0.00479595	0.707195	1.0225	0.0321036	0.150461
IPI00013396.3;4507127	U1 small nuclear ribonucleoprotein C	20.75	32	4	4	17	0.000335851	0.000248856	0.71603	1.34958	0.43251	0.145069
IPI00009867.3;119395754	Keratin, type II cytoskeletal 5	34.58	4	16	24	133	0.00136646	0.000944333	0.71931	1.44701	0.533072	0.143084
IPI00479786.5;154355000	KH-type splicing regulatory protein	79.32	6	59	67	1343	0.0397447	0.0359727	0.720274	1.10486	0.14386	0.142502
IPI00910614.1	heterogeneous nuclear ribonucleoprotein R isoform 4	21.24	5	6	11	20	0.000605486	0.00123844	0.723435	0.48891	-1.03236	0.140601
IPI00411329.4	Putative uncharacterized protein HNRNPA1P4 (Fragment)	76.38	1	4	26	74	0.0154831	0.0158115	0.740313	0.979232	-0.030278	0.130584
IPI00472891.2	SWI related protein	6.95	4	5	5	16	0	0.000200791	0.754135	0	#NUM!	0.122551
IPI00215965.2	Isoform A1-B of Heterogeneous nuclear ribonucleoprotein A1	78.49	2	3	51	852	0.0800461	0.0948263	0.754713	0.844134	-0.244456	0.122218
IPI00029631.1	Enhancer of rudimentary homolog	37.5	1	4	4	8	0	0.000207813	0.759438	0	#NUM!	0.119508
IPI00007797.3	Fatty acid-binding protein, epidermal	22.96	1	4	4	4	0	1.93655e-05	0.770571	0	#NUM!	0.113187
IPI00020991.2;8923040	CDKN2A interacting protein	26.9	5	12	12	96	0.00052762	0.000529958	0.780099	0.995588	-0.00637909	0.10785
IPI00003865.1;5729877	Isoform 1 of Heat shock cognate 71 kDa protein	53.1	45	28	35	258	0.00104165	0.000884363	0.785521	1.17785	0.236156	0.104842
IPI00031526.3;13128992	Uncharacterized protein C19orf43	42.05	3	13	13	36	0.000427619	0.000560945	0.802936	0.76232	-0.391532	0.0953192
IPI00383296.5;157412270	Isoform 2 of Heterogeneous nuclear ribonucleoprotein M	34.73	38	6	20	83	0.000170052	0.000161394	0.807991	1.05365	0.0753894	0.0925936
IPI00011913.1	Heterogeneous nuclear ribonucleoprotein A0	32.79	1	8	9	44	0.0012228	0.00185215	0.822443	0.660208	-0.599008	0.0848941
IPI00304692.1	Heterogeneous nuclear ribonucleoprotein G	31.46	1	14	24	271	0.010403	0.0105522	0.843311	0.985863	-0.0205407	0.0740121
IPI00930205.1;228008293	synaptotagmin binding, cytoplasmic RNA interacting protein isoform 5	38.15	19	13	18	106	0.00194956	0.001974	0.843953	0.987617	-0.0179764	0.0736817
IPI00465365.4;4504445	Isoform A1-A of Heterogeneous nuclear ribonucleoprotein A1	95.63	3	2	48	499	0.117302	0.127058	0.87899	0.923211	-0.115268	0.056016
IPI00873244.1	Isoform Short of Cold shock domain-containing protein E1	4.56	3	3	3	3	0	7.31961e-05	0.882222	0	#NUM!	0.0544221
IPI00180954.4;4502847	Cold-inducible RNA-binding protein	75	6	17	17	182	0.00130749	0.00245291	0.882252	0.533038	-0.90769	0.0544073
IPI00021536.2	Calmodulin-like protein 5	15.75	1	4	4	13	0.000470585	0.00060709	0.895358	0.775148	-0.367456	0.0480032
IPI00305092.7;14150139	Isoform 1 of Partner of Y14 and mago	57.84	5	1	13	106	0.000490175	0.000257522	0.907827	1.90343	0.928601	0.0419969
IPI00789324.3	cDNA FLJ60424, highly similar to Junction plakoglobin	9.06	1	3	5	11	0.000478774	0.00128005	0.915821	0.374026	-1.41879	0.0381894
IPI00012382.3;4759156	U1 small nuclear ribonucleoprotein A	28.01	2	7	7	73	0.000488926	0.000724989	0.918283	0.674392	-0.568341	0.0370237
IPI00396378.3;14043072	Isoform B1 of Heterogeneous nuclear ribonucleoproteins A2/B1	83.29	6	48	52	1209	0.0393412	0.0618714	0.924276	0.635855	-0.65323	0.0341981
IPI00790634.2;219803946	Isoform 2 of Partner of Y14 and mago	63.55	5	2	14	116	0.000490175	0.000257522	0.940087	1.90343	0.928601	0.026832
38569421;IPI00021290.5	ATP-citrate synthase isoform 1 [Homo sapiens]	15.35	18	13	13	59	0	0.000270689	0.944085	0	#NUM!	0.0249887
IPI00013881.6;5031753	Heterogeneous nuclear ribonucleoprotein H	39.64	15	17	17	138	0.000174071	0.000332355	0.975995	0.523749	-0.933053	0.0105526
IPI00293665.9;119703753	Keratin, type II cytoskeletal 6B	39.36	8	4	26	115	0.00192184	0.00213743	0.980312	0.899137	-0.153388	0.00863585
IPI00876879.1	cAMP responsive element modulator isoform g	61.11	1	3	4	4	0	2.45771e-05	0.986781	0	#NUM!	0.0057793
IPI00746438.2	Isoform 2 of 60S ribosomal protein L11	18.64	2	3	3	3	0	7.82402e-05	0.988772	0	#NUM!	0.00490376

## Sheet: Candidate interactors of OLR1
Accession	Gene name	Σ# PSMs	low/high	p-value
IPI00179700.3;22208967	HMGA1	286	7.11016	0.00271668
IPI00554761.2;48255933	HMGN1	81	6.56024	0.00456909
IPI00006378.3	CCDC72	28	6.30123	0.196886
IPI00217950.5	HMGN2	6	6.10687	0.15529
IPI00419585.9;10863927	PPIA	99	5.45496	0.0365511
IPI00021570.1	EDF1	53	4.73517	0.0160297
IPI00465044.2;29789090	RCC2	104	4.11058	0.13124
IPI00010740.1	SFPQ	114	3.78808	0.349864
IPI00889541.2;38201710	DDX17	14	2.96371	5.84383e-05
IPI00020956.1;4758516	HDGF	84	2.94648	0.0401549
IPI00449049.5;156523968	PARP1	27	2.89382	0.0215889
IPI00643781.1;71052048	PSIP1	199	2.60554	0.192073
IPI00060627.2;19923969	CCDC124	31	2.4464	0.120689
IPI00293254.1	EWS	42	1.84002	0.759438
IPI00843996.1;224084730	SFRS3	62	1.78311	0.245655
IPI00013396.3;4507127	SNRPC	17	1.34958	0.71603
IPI00304596.3;34932414	NONO	155	1.26779	0.12108
Accession	Gene name	Σ# PSMs	low/high	p-value
IPI00179964.5;14165466	PTBP1	100	0.710219	0.44425
IPI00940851.1;38201714	ELAV1	47	0.827194	0.567844
IPI00334713.1;55956921	HNRNPAB	752	0.755146	0.308215
IPI00396378.3;14043072	HNRNPA2B1	1209	0.635855	0.924276
IPI00180954.4;4502847	CIRBP	182	0.533038	0.882252
IPI00061178.1	RBMXL1	65	0.371781	0.413933
IPI00293655.3;4826686	DDX1	14	0.309778	0.405102
IPI00009032.1;10835067	SSB	96	0.277196	0.0231615
IPI00215884.4;5902076	SFRS1	59	0.13839	0.000968333
IPI00012340.1	SFRS9	72	0	0.0238947
77695912;IPI00644708.1	TIA1	71	0	0.0863248
